# Supplementary material for: Differences in rates and odds for emergency caesarean section in six Palestinian hospitals: a population-based birth cohort study
Source: PubMed Central journal article supplement — BMJ Open. 2018 Mar 2;8(3):e019509. doi: 10.1136/bmjopen-2017-019509 (PMC5855207; doi:10.1136/bmjopen-2017-019509), 2018-03-02
Supplement: bmjopen-2017-019509.draft_revisions.pdf [file bmjopen-2017-019509.draft_revisions.pdf]

# BMJ Open

BMJ Open is committed to open peer review. As part of this commitment we make the peer review history of every article we publish publicly available.

When an article is published we post the peer reviewers' comments and the authors' responses online. We also post the versions of the paper that were used during peer review. These are the versions that the peer review comments apply to.

The versions of the paper that follow are the versions that were submitted during the peer review process. They are not the versions of record or the final published versions. They should not be cited or distributed as the published version of this manuscript.

BMJ Open is an open access journal and the full, final, typeset and author-corrected version of record of the manuscript is available on our site with no access controls, subscription charges or pay-per-view fees (<http://bmjopen.bmj.com>).

If you have any questions on BMJ Open's open peer review process please email [info.bmjopen@bmj.com](mailto:info.bmjopen@bmj.com)

# BMJ Open

## Differences in rates and risks for emergency caesarean section in six Palestinian hospitals: a population based birth cohort study

|                                 |                                                                                                                                                                                                                                                                                                                                                                                                                                                                                                                                                                                                                                                                                                                                                                                                                                                                                                                                                                                                                                                                                                                                                                                                                                                                                                                                                                                                                                                                                                     |
|---------------------------------|-----------------------------------------------------------------------------------------------------------------------------------------------------------------------------------------------------------------------------------------------------------------------------------------------------------------------------------------------------------------------------------------------------------------------------------------------------------------------------------------------------------------------------------------------------------------------------------------------------------------------------------------------------------------------------------------------------------------------------------------------------------------------------------------------------------------------------------------------------------------------------------------------------------------------------------------------------------------------------------------------------------------------------------------------------------------------------------------------------------------------------------------------------------------------------------------------------------------------------------------------------------------------------------------------------------------------------------------------------------------------------------------------------------------------------------------------------------------------------------------------------|
| Journal:                        | <i>BMJ Open</i>                                                                                                                                                                                                                                                                                                                                                                                                                                                                                                                                                                                                                                                                                                                                                                                                                                                                                                                                                                                                                                                                                                                                                                                                                                                                                                                                                                                                                                                                                     |
| Manuscript ID                   | bmjopen-2017-019509                                                                                                                                                                                                                                                                                                                                                                                                                                                                                                                                                                                                                                                                                                                                                                                                                                                                                                                                                                                                                                                                                                                                                                                                                                                                                                                                                                                                                                                                                 |
| Article Type:                   | Research                                                                                                                                                                                                                                                                                                                                                                                                                                                                                                                                                                                                                                                                                                                                                                                                                                                                                                                                                                                                                                                                                                                                                                                                                                                                                                                                                                                                                                                                                            |
| Date Submitted by the Author:   | 06-Sep-2017                                                                                                                                                                                                                                                                                                                                                                                                                                                                                                                                                                                                                                                                                                                                                                                                                                                                                                                                                                                                                                                                                                                                                                                                                                                                                                                                                                                                                                                                                         |
| Complete List of Authors:       | Zimmo, Mohammed; Department of Obstetrics, Al Shifa Hospital, Gaza, Palestine, obstetrics and gynaecology; Institute for clinical medicine, Faculty of Medicine, University of Oslo, Oslo, Norway, Department of Obstetrics<br>Laine, Katariina; Oslo University Hospital, Department of Obstetrics; University of Oslo, Department of Health Management and Health Economics, Institute of Health and Society<br>Hassan, Sahar; Institute of Community and Public Health, Birzeit University, Palestine; Faculty of Nursing, Pharmacy and Health Professions, Birzeit University, Palestine<br>Fosse, Erik; The Intervention Centre, Oslo University Hospital Rikshospitalet, Oslo, Norway; Institute for clinical medicine, Faculty of Medicine, University of Oslo, Oslo, Norway<br>Lieng, Marit; Oslo University Hospital, Ullevål, Department of Obstetrics<br>Ali, Hadil; Department of Obstetrics, Palestine Medical Complex hospital, Ramallah, Palestine; Institute for clinical medicine, Faculty of Medicine, University of Oslo, Oslo, Norway<br>zimmo, kaled; Al Aqsa Hospital, Obstetrics Department; Intervention Centre, Oslo University Hospital Rikshospitalet<br>Anti, Marit; Hoyskolen Campus Kristiania Markedshoyskolen<br>Bottcher, Bettina.; Faculty of Medicine<br>Sørum Falk, Ragnhild; Research Support Services, Oslo University Hospital, Oslo Centre for Biostatistics and Epidemiology<br>Vikanes, Åse; Intervention Centre, Oslo University Hospital Rikshospitalet |
| <b>Primary Subject Heading</b>: | Obstetrics and gynaecology                                                                                                                                                                                                                                                                                                                                                                                                                                                                                                                                                                                                                                                                                                                                                                                                                                                                                                                                                                                                                                                                                                                                                                                                                                                                                                                                                                                                                                                                          |
| Secondary Subject Heading:      | Health services research, Obstetrics and gynaecology                                                                                                                                                                                                                                                                                                                                                                                                                                                                                                                                                                                                                                                                                                                                                                                                                                                                                                                                                                                                                                                                                                                                                                                                                                                                                                                                                                                                                                                |
| Keywords:                       | Maternal medicine < OBSTETRICS, OBSTETRICS, Prenatal diagnosis < OBSTETRICS                                                                                                                                                                                                                                                                                                                                                                                                                                                                                                                                                                                                                                                                                                                                                                                                                                                                                                                                                                                                                                                                                                                                                                                                                                                                                                                                                                                                                         |
|                                 |                                                                                                                                                                                                                                                                                                                                                                                                                                                                                                                                                                                                                                                                                                                                                                                                                                                                                                                                                                                                                                                                                                                                                                                                                                                                                                                                                                                                                                                                                                     |

SCHOLARONE™  
Manuscripts

## Differences in rates and risks for emergency caesarean section in six

### Palestinian hospitals: a population-based birth cohort study

Mohammed W. Zimmo, MD, MD, PhD candidate,<sup>1-3</sup> Katariina Laine, MD, PhD,<sup>4,5</sup> Sahar Hassan, PhD,<sup>6</sup> Erik Fosse, MD, PhD,<sup>2,3</sup> Marit Lieng, MD, PhD,<sup>2,7</sup> Hadil Ali-Masri, MD, PhD candidate,<sup>2,3,8</sup> Kaled Zimmo, MD, PhD candidate,<sup>2,3,9</sup> Marit Anti, PhD,<sup>10</sup> Bettina Bottcher, PhD,<sup>11</sup> Ragnhild Sørnum Falk, PhD,<sup>12</sup> Åse Vikanes, PhD<sup>3</sup>

#### Addresses:

<sup>1</sup>Obstetrics Department, Al Shifa Hospital, Gaza, Palestine

<sup>2</sup>Institute for Clinical Medicine, Faculty of Medicine, University of Oslo, Norway

<sup>3</sup>Intervention Centre, Oslo University Hospital Rikshospitalet, Oslo, Norway

<sup>4</sup>Department of Obstetrics, Oslo University Hospital, Ullevål, Oslo, Norway

<sup>5</sup>Department of Health Management and Health Economics, Institute of Health and Society, University of Oslo, Norway

<sup>6</sup>Faculty of Pharmacy, Nursing, and Health Professions, Birzeit University, Palestine

<sup>7</sup>Department of Gynaecology, Oslo University Hospital, Ullevål, Oslo, Norway

<sup>8</sup>Obstetrics Department, Palestine Medical complex, West Bank, Palestine

<sup>9</sup>Obstetrics Department, Al Aqsa Hospital, Gaza, Palestine

<sup>10</sup>Oslo School of Management, Oslo, Norway

<sup>11</sup>Faculty of Medicine, Islamic University, Gaza, Palestine

<sup>12</sup>Oslo Centre for Biostatistics and Epidemiology, Research Support Services, Oslo University Hospital, Oslo, Norway

#### Corresponding author:

Mohammed Walid Zimmo

Word count: 3289

241/47 Gaza, Palestine

Tables No.: 5

Mobile No.: +972595325896

Supplementary figure: 1

E-mail address: [mohammedzimmo1983@gmail.com](mailto:mohammedzimmo1983@gmail.com)

References No.: 28

**Keywords:** caesarean section, emergency, Palestine, rate, risk factor.

### **Abstract**

**Objective:** To assess the differences in rates and risks for emergency caesarean section in six governmental Palestinian hospitals.

**Design:** A prospective population-based birth cohort study.

**Setting:** Obstetric departments in six governmental Palestinian hospitals.

**Participants:** 32 321 women with scheduled to deliver vaginally from 1 March 2015, until 29 February 2016.

**Methods:** To assess differences in sociodemographic and antenatal obstetric characteristics by hospital, chi-square test and ANOVA analysis were applied. Logistic regression was used to estimate differences in risk for emergency caesarean section, odds ratios (OR) with 95% confidence intervals (CI) were assessed.

### **Main outcome measures**

The primary outcome was the rate and risk of emergency caesarean section according to hospitals where the women delivered.

**Results:** The prevalence of emergency caesarean section varied across hospitals, ranging from 5.8% and 22.6% among primiparous women, and between 4.8% and 13.1% among parous women. Compared to the reference hospital the risks for emergency caesarean section were increased in all other hospitals; crude ORs ranging from 1.95 (95% CI 1.42–2.67) to 4.75 (95% CI 3.49–6.46) among primiparous women. For parous women these differences were less pronounced; crude ORs ranging from 1.37 (95% CI 1.13–1.67) to 2.99 (95% CI 2.44–3.65). After adjustment for potential confounders, the ORs were reduced but still statistically significant, except for one hospital among parous women.

1  
2  
3 **Conclusion:** Substantial differences in risk for emergency caesarean section between the six  
4  
5 Palestinian governmental hospitals were observed. These could not be explained by the  
6  
7 studied sociodemographic or antenatal obstetric characteristics.  
8

9 *Strength and limitation of the study*  
10

- 11 • This study is the largest, population-based, prospective birth cohort study in Palestine,  
12 which include both Gaza and West Bank hospitals  
13
  - 14 • All women aiming to give birth vaginally in the six study hospitals were included,  
15  
16 reducing the risk for selection bias.  
17
  - 18 • The main limitation of this study was the large proportion of missing data on deliveries  
19  
20 in one of the study hospitals. The missing data were expected to be random, and  
21  
22 therefore not influencing the exposure-outcome associations studied.  
23  
24
  - 25 • Data on diabetes before and during pregnancy were not registered accurately and could  
26  
27 therefore not be used for analyses.  
28
  - 29 • Inaccurate registration of maternal weight and place of residence in some hospitals.  
30  
31
- 32  
33  
34  
35  
36  
37  
38  
39  
40  
41  
42  
43  
44  
45  
46  
47  
48  
49  
50  
51  
52  
53  
54  
55  
56  
57  
58  
59  
60

## Introduction

Caesarean section is one of the most common surgical procedures worldwide.<sup>1</sup> The rate of caesarean section has increased globally from 7% in 1990 to 19% in 2014.<sup>2</sup> This increase in caesarean section rates is, however, not associated with improved outcomes for mothers and newborns.<sup>3</sup> Although delivery by caesarean section is considered safe, it is associated with adverse short term as well as long term consequences for mothers and children.<sup>4</sup> The most worrying rise in caesarean section rate is therefore seen among healthy primiparous women with singleton pregnancies at term, who were having a low risk of caesarean section.<sup>5</sup> Despite international evidence-based guidelines for indications of caesarean section, the caesarean section rates vary between countries (from 5% in Sub-Saharan Africa to around 40% in Latin America) and even between hospitals within the same countries.<sup>2,6</sup> A study found that different caesarean section rates in National Health Service (NHS) Trusts in the UK were mainly restricted to emergency caesarean section and not to planned caesarean sections.<sup>6</sup> Other study has reported that differences in maternal or fetal risk factors do not explain the variations in caesarean sections rates.<sup>7</sup> Health personnel's decision to perform caesarean section is known to be influenced by cultural factors, legal liability as well as medical evidence.<sup>8</sup>

In Palestine, two previous studies on caesarean section rates have been published.<sup>9,10</sup> A study from Makassed Charitable Hospital in East Jerusalem, including 6804 women showed that the caesarean section rate increased from 4.4% to 12.6% between 1993 and 2002.<sup>10</sup> Another study in 2006, using data from the Palestinian Family Health Survey of 6113 women from Gaza and the West Bank, reported an increase in caesarean section rates from 6.0% in 1996 to 14.6% in 2006.<sup>9</sup> Both studies lacked information on potential confounders. According to the Palestinian Ministry of Health in 2015, the overall caesarean section rate was 23.2%.<sup>11</sup> Since these studies

1  
2  
3 were published, the political situation in the occupied Palestinian Territories has become more  
4  
5 challenging given the siege on Gaza, which is recently reported to influence health services.<sup>12</sup>  
6

7 The main aim of this study was to explore any differences in rates and risks for emergency  
8  
9 caesarean section in six governmental hospitals in Palestine.  
10

## 11 **Methods**

12  
13 The data were obtained from a population-based birth cohort study in six Palestinian  
14  
15 governmental hospitals from 1 March 2015, until 29 February 2016. Three hospitals (1, 2 and  
16  
17 3) were located in Gaza and three (4, 5 and 6) in the West Bank. All hospitals were teaching  
18  
19 hospitals except one (Hospital 2). Teaching hospitals in Palestine had educational programs  
20  
21 for health personnel; such as nurses, midwives and medical doctors. All were referral  
22  
23 hospitals, except one (Hospital 1). Referral hospitals in Palestine received patients from other  
24  
25 governmental or private hospitals in the neighbouring areas. Hospital 1, being non-referral,  
26  
27 was the only one without a maternal intensive care unit.  
28  
29

30  
31 All women planned for vaginal delivery were included in the study. Women planned for  
32  
33 elective caesarean section, those with two or more previous caesarean sections, multiple  
34  
35 gestations and those with missing information about mode of delivery were excluded (see  
36  
37 online supplementary figure 1).  
38

### 39 *Data collection and entry*

40  
41  
42 A case registration form, developed by Palestinian and Norwegian obstetricians and  
43  
44 midwives, was used to collect data on maternal sociodemographic, antenatal obstetric  
45  
46 characteristics and mode of delivery prospectively. Before the data collection started, research  
47  
48 teams in each hospital were established, comprising the heads of obstetric departments,  
49  
50 medical doctors and midwives working in the labour wards. The case registration form was  
51  
52 filled in by doctors and midwives attending the births. The registered data were entered by  
53  
54 research teams into a tailor made version of District Health Information Software 2 (DHIS2,  
55  
56  
57  
58  
59  
60

1  
2  
3 version 2.24). DHIS 2 has been created by the Department of Global Infrastructure at the  
4 University of Oslo. It is a free, adaptable web-based open-source information system tool  
5 developed with support from the Norwegian Agency for Development (NORAD). Data were  
6 transferred from DHIS2 to be stored in Service for Sensitive Data (TSD) platform which is  
7 developed and operated by the University of Oslo for researchers to collect, store, analyse and  
8 share sensitive data in compliance with the Norwegian regulations regarding individuals'  
9 privacy (tsd-drift@usit.uio.no).

### 17 *Risk factors*

18  
19 Data on maternal pre-pregnancy weight and height were obtained from the mother and child  
20 health handbook and if the booklet was unavailable, the medical teams obtained this  
21 information by asking the women.

22  
23 Maternal age was categorized into five-year age groups (table 1). Place of residence was  
24 dichotomised into camp or urban-rural area. Maternal education was categorised into three  
25 groups according to length of education (table 1). Pre-pregnancy body mass index was  
26 categorised according to the World Health Organization classification:  $\leq 18.5$ , 18.5-24.9, 25.0-  
27 29.9 and  $\geq 30.0$  kg/m<sup>2</sup>.<sup>14</sup> Mode of delivery was dichotomised into vaginal (normal and assisted  
28 vaginal) and emergency caesarean section.

29  
30 Parity was dichotomised into primiparous and parous women. Previous caesarean section was  
31 dichotomised into no/yes. Number of antenatal visits was categorised into four groups: <3, 4-  
32 7, 8-12 and 13-20 visits. In vitro fertilisation treatment was dichotomised into no/yes.

33  
34 Hypertensive disorder, which included hypertension before as well as during pregnancy and  
35 preeclampsia, was dichotomised into no/yes. Induction of labour, by misoprostol or balloon  
36 catheter, was dichotomised into no/yes. Unknown information of hypertensive disorder and  
37 induction of labour were considered as no disorder/induction.

### 38 *Outcomes*



1  
2  
3 The primary outcome for this study was rates and risks of emergency caesarean section  
4 according to hospitals where the women delivered.

5  
6  
7 Emergency caesarean section covered a wide range of clinical situations from an immediate  
8 threat to the mother or baby to conditions requiring early delivery. The criteria for emergency  
9 caesarean section in this study reflect Lucas urgency classification one, two and three.<sup>15</sup>  
10  
11  
12

### 13 *Statistical analysis*

14  
15 Descriptive analyses were conducted for the baseline characteristics of the women. To assess  
16 differences by hospitals, comparison of proportions was tested by chi-square test and  
17 differences in means by one-way ANOVA analysis.  
18  
19  
20

21  
22 In order to study the effect of the hospital on the risk of emergency caesarean section, logistic  
23 regression analyses were applied; stratified according to parity. Age, place of residence,  
24 education, body mass index, number of children alive, previous caesarean section, number of  
25 antenatal visits, in vitro fertilisation treatment, hypertensive disorder and induction of labour  
26 were included as potential confounders. The strength of the association between each variable  
27 and the risk of emergency caesarean section was estimated by odds ratios (ORs) with 95%  
28 confidence intervals (CIs). Due to low numbers in categories,  $\leq 18.5$  and  $18.5-24.9$  kg/m<sup>2</sup> of  
29 body mass index, they merged into one group in regression analyses.  
30  
31  
32

33  
34 For primiparous women, education had to be excluded due to multicollinearity. We found no  
35 multicollinearity among parous women. Interaction between hospital and the adjusting  
36 variables were explored by entering product terms, one at a time, into the model. Interactions  
37 with  $p < 0.001$  were reported in the text.  
38  
39  
40

41  
42 P values  $< 0.05$  were considered statistically significant. All statistical analyses were  
43 performed using SPSS 22 (SPSS Inc., Chicago, IL, USA).  
44  
45  
46  
47

## 48 **Results**

49  
50  
51  
52  
53  
54  
55  
56  
57  
58  
59  
60

During the study period 35 109 women gave birth. In total 32 321 pregnant women were planned for vaginal birth and included in this study. Of these women, 2932 (9.1%) were delivered by emergency caesarean section. Emergency caesarean section prevalence varied significantly between the hospitals, ranging from 5.0% to 15.7% (table 3).

Significant differences were found between the hospitals for maternal age, place of residence, education and body mass index; all p-values <0.001. Hospital 3 had the largest proportion of the youngest women giving birth where 17.3% was being 20 years old or younger. In contrast, Hospital 2 had the largest proportion of the oldest women delivering, where approximately 2% were aged 40 years or more.

There were significant differences between hospitals regarding women living in refugee camps ranging from 0.3% in Hospital 4 to 41.2% in Hospital 3. Almost 60% had between 10-12 years of education, ranging from 34.6% in Hospital 6 to 64.6% in Hospital 3. More than 80% (27 172) of the women had a body mass index  $\geq 25$  kg/m<sup>2</sup> (table 1).

Table 1: Sociodemographic characteristics of the study population (N=32 321)

|                           | Gaza                            |                                 |                                   | West Bank                       |                                 |                                 | p value* |
|---------------------------|---------------------------------|---------------------------------|-----------------------------------|---------------------------------|---------------------------------|---------------------------------|----------|
|                           | Hospital 1<br>(N=4674)<br>N (%) | Hospital 2<br>(N=4895)<br>N (%) | Hospital 3<br>(N=10 849)<br>N (%) | Hospital 4<br>(N=5519)<br>N (%) | Hospital 5<br>(N=3626)<br>N (%) | Hospital 6<br>(N=2758)<br>N (%) |          |
| <b>Maternal age</b>       |                                 |                                 |                                   |                                 |                                 |                                 |          |
| ≤20                       | 519 (11.8)                      | 472 (9.9)                       | 1823 (17.3)                       | 839 (15.2)                      | 380 (10.5)                      | 305 (11.3)                      | <0.001   |
| 21-25                     | 1669 (37.9)                     | 1570 (32.9)                     | 4058 (38.5)                       | 1845 (33.5)                     | 1367 (37.9)                     | 1067 (39.6)                     |          |
| 26-30                     | 1230 (28.0)                     | 1440 (30.2)                     | 2616 (24.8)                       | 1401 (25.4)                     | 1021 (28.3)                     | 708 (26.3)                      |          |
| 31-35                     | 628 (14.3)                      | 818 (17.2)                      | 1293 (12.3)                       | 849 (15.4)                      | 562 (15.6)                      | 395 (14.7)                      |          |
| 36-40                     | 285 (6.5)                       | 369 (7.7)                       | 590 (5.6)                         | 481 (8.7)                       | 218 (6.0)                       | 179 (6.6)                       |          |
| >40                       | 69 (1.6)                        | 98 (2.1)                        | 158 (1.5)                         | 98 (1.8)                        | 58 (1.6)                        | 40 (1.5)                        |          |
| Missing                   | 274                             | 128                             | 311                               | 6                               | 20                              | 64                              |          |
| <b>Place of residence</b> |                                 |                                 |                                   |                                 |                                 |                                 |          |
| Urban/rural               | 3636 (84.4)                     | 4640 (97.0)                     | 6333 (58.8)                       | 5498 (99.7)                     | 3516 (97.2)                     | 2548 (93.6)                     | <0.001   |
| Camp                      | 673 (15.6)                      | 144 (3.0)                       | 4436 (41.2)                       | 14 (0.3)                        | 100 (2.8)                       | 175 (6.4)                       |          |
| Missing                   | 365                             | 111                             | 80                                | 7                               | 10                              | 35                              |          |
| <b>Education,</b>         |                                 |                                 |                                   |                                 |                                 |                                 |          |

|                        |             |             |             |             |             |             |        |
|------------------------|-------------|-------------|-------------|-------------|-------------|-------------|--------|
| <b>(years)</b>         |             |             |             |             |             |             |        |
| ≤9                     | 553 (11.8)  | 190 (3.9)   | 448 (4.1)   | 839 (15.2)  | 534 (14.7)  | 1111 (40.3) | <0.001 |
| 10-12                  | 2791 (59.8) | 2885 (59.0) | 6995 (64.6) | 3075 (55.8) | 1748 (48.2) | 954 (34.6)  |        |
| ≥13                    | 1327 (28.4) | 1818 (37.2) | 3389 (31.3) | 1598 (29.0) | 1342 (37.0) | 692 (25.1)  |        |
| Missing                | 3           | 2           | 17          | 7           | 2           | 1           |        |
| <b>Body Mass Index</b> |             |             |             |             |             |             |        |
| ≤18.5                  | 2 (0.0)     | 2 (0.0)     | 3 (0.0)     | 4 (0.1)     | 4 (0.1)     | 1 (0.1)     | <0.001 |
| 18.5-24.9              | 514 (12.3)  | 393 (8.1)   | 533 (4.9)   | 978 (17.9)  | 766 (21.3)  | 344 (18.6)  |        |
| 25-29.9                | 2400 (57.5) | 2811 (58.0) | 2325 (21.6) | 2597 (47.4) | 1711 (47.5) | 980 (53.0)  |        |
| ≥30                    | 1256 (30.1) | 1638 (33.8) | 7915 (73.5) | 1898 (34.7) | 1118 (31.1) | 523 (28.3)  |        |
| Missing                | 502         | 51          | 73          | 42          | 27          | 910         |        |

p-value from chi-square test is used to test the difference between hospitals

Table 2 describes the antenatal obstetric characteristics of all births. About 25% of women were primiparous. Furthermore, women in Hospitals 4 and 5 had significantly more induction of labour than other Hospitals (table 2). There were significant differences in hypertensive disorders between hospitals ranging from 0.9% in Hospital 6 to 4.4% in Hospital 3. The numbers of antenatal visits varied between hospitals. The women in Hospitals 1, 2 and 3 in Gaza had around 5 antenatal visits (SD 2.0; range 0–24) compared to nine (SD 2.9; range 0–29) in Hospitals 4, 5 and 6 in the West Bank (table 2). Less than 1% of women in all hospitals had undergone in vitro fertilization treatment.

Table 2: Antenatal obstetric characteristics of the study population (N=32 321)

|                                            | Hospital 1<br>(N=4674)<br>N (%) | Hospital 2<br>(N=4895)<br>N (%) | Hospital 3<br>(N=10 849)<br>N (%) | Hospital 4<br>(N=5519)<br>N (%) | Hospital 5<br>(N=3626)<br>N (%) | Hospital 6<br>(N=2758)<br>N (%) | p value  |
|--------------------------------------------|---------------------------------|---------------------------------|-----------------------------------|---------------------------------|---------------------------------|---------------------------------|----------|
|                                            | Gaza                            |                                 |                                   | West Bank                       |                                 |                                 |          |
| <b>Parity</b>                              |                                 |                                 |                                   |                                 |                                 |                                 |          |
| Primiparous                                | 1072 (22.9)                     | 1223 (25.0)                     | 2846 (26.2)                       | 1217 (22.1)                     | 1002 (27.6)                     | 749 (27.2)                      | <0.001*  |
| Parous                                     | 3600 (77.1)                     | 3672 (75.0)                     | 8001 (73.8)                       | 4302 (77.9)                     | 2624 (72.4)                     | 2008 (72.8)                     |          |
| Missing                                    | 2                               | 0                               | 2                                 | 0                               | 0                               | 1                               |          |
| <b>Number of children alive, mean (SD)</b> | 2.93 (1.92)                     | 2.90 (1.94)                     | 2.75 (2.06)                       | 2.94 (1.92)                     | 2.48 (1.64)                     | 2.53 (1.66)                     | <0.001** |

|                                              |             |             |               |             |             |             |          |
|----------------------------------------------|-------------|-------------|---------------|-------------|-------------|-------------|----------|
| <b>Previous caesarean among parous women</b> |             |             |               |             |             |             |          |
| 0                                            | 3419 (95.0) | 3393 (92.4) | 7161 (89.5)   | 3704 (86.1) | 2295 (87.5) | 1869 (93.1) | <0.001*  |
| 1                                            | 181 (5.0)   | 279 (7.6)   | 840 (10.5)    | 598 (13.9)  | 329 (12.5)  | 139 (6.9)   |          |
| <b>Number of antenatal visits, mean (SD)</b> | 5.12 (1.97) | 5.75 (1.98) | 5.53 (1.97)   | 9.06 (3.06) | 8.60 (2.16) | 9.64 (3.42) | <0.001** |
| <b>Antenatal visits</b>                      |             |             |               |             |             |             |          |
| ≤3                                           | 947 (20.3)  | 181 (3.7)   | 1358 (12.5)   | 221 (4.0)   | 84 (2.3)    | 103 (3.7)   | <0.001*  |
| 4-7                                          | 3171 (67.9) | 3783 (77.4) | 7334 (67.7)   | 1068 (19.4) | 677 (18.7)  | 439 (16.0)  |          |
| 8-12                                         | 550 (11.8)  | 919 (18.8)  | 2132 (19.7)   | 3648 (66.3) | 2762 (76.3) | 1845 (67.1) |          |
| 13-20                                        | 3 (0.1)     | 4 (0.1)     | 14 (0.1)      | 564 (10.3)  | 97 (2.7)    | 364 (13.2)  |          |
| Missing                                      | 3           | 8           | 11            | 18          | 6           | 7           |          |
| <b>In vitro fertilization treatment</b>      |             |             |               |             |             |             |          |
| Yes                                          | 26 (0.6)    | 13 (0.3)    | 35 (0.3)      | 32 (0.6)    | 19 (0.5)    | 14 (0.5)    | <0.043*  |
| No                                           | 4476 (99.4) | 4809 (99.7) | 10 507 (99.7) | 5471 (99.4) | 3592 (99.5) | 2723 (99.5) |          |
| Missing                                      | 172         | 73          | 307           | 16          | 15          | 21          |          |
| <b>Hypertensive disorder</b>                 |             |             |               |             |             |             |          |
| Yes                                          | 155 (3.3)   | 147 (3.0)   | 473 (4.4)     | 158 (2.9)   | 68 (1.9)    | 26 (0.9)    | <0.001*  |
| No/unknown                                   | 4519 (96.7) | 4748 (97.0) | 10 376 (95.6) | 5361 (97.1) | 3558 (98.1) | 2732 (99.1) |          |
| <b>Induction of labour</b>                   |             |             |               |             |             |             |          |
| Yes                                          | 373 (8.0)   | 549 (11.2)  | 1424 (13.1)   | 1027 (18.6) | 601 (16.6)  | 324 (11.7)  | <0.001*  |
| No/Unknown                                   | 4301 (92.0) | 4346 (88.8) | 9425 (86.9)   | 4492 (81.4) | 3025 (83.4) | 2434 (88.3) |          |

SD= standard deviation.

\*p-value from chi-square test is used to test the difference between hospitals.

\*\*p-value from analysis of variance by ANOVA test is used to test the difference between hospitals.

Significant differences in the prevalence of emergency caesarean section between hospitals were observed, for primiparous as well as parous women. Among primiparous women, the prevalence was 12.4% ranging from 5.8 in Hospital 1 to 22.6% in Hospital 6. Likewise for parous women, the prevalence was 7.9% ranging from 4.8 in Hospital 1 to 13.1% in Hospital 6 (table 3).

Table 3: Prevalence of emergency caesarean section in the study hospitals

|                                    | Hospital 1<br>(N=4674) | Hospital 2<br>(N=4895) | Hospital 3<br>(N=10 849) | Hospital 4<br>(N=5519) | Hospital 5<br>(N=3626) | Hospital 6<br>(N=2758) | p<br>value*** |
|------------------------------------|------------------------|------------------------|--------------------------|------------------------|------------------------|------------------------|---------------|
|                                    | Gaza                   |                        |                          | West Bank              |                        |                        |               |
| <b>Emergency caesarean section</b> | % (N)*                 | % (N)*                 | % (N)*                   | % (N)*                 | % (N)*                 | % (N)*                 |               |
| All women                          | 5.0<br>(235/4674)      | 8.0<br>(391/4895)      | 9.4<br>(1015/10 849)     | 7.4<br>(409/5519)      | 12.4<br>(450/3626)     | 15.7<br>(432/2758)     | <0.001        |
| <b>Parity</b>                      | % (N)**                | % (N)**                | % (N)**                  | % (N)**                | % (N)**                | % (N)**                |               |
| Primiparous women                  | 5.8<br>(62/1072)       | 10.9<br>(133/1223)     | 12.8<br>(365/2846)       | 10.7<br>(130/1217)     | 15.0<br>(150/1002)     | 22.6<br>(169/749)      | <0.001        |
| Parous women                       | 4.8<br>(173/3600)      | 7.0<br>(258/3672)      | 8.1<br>(650/8001)        | 6.5<br>(279/4302)      | 11.4<br>(300/2624)     | 13.1<br>(263/2008)     | <0.001        |

\*N=number of emergency caesarean section/ total number of deliveries in the hospital.

\*\*N=number of emergency caesarean section/ total number of deliveries among women group in the hospital.

\*\*\*p-value from chi-square test.

Among primiparous women, the odds ratio (ORs) for emergency caesarean section differed by hospital (table 4). Hospital 1 had the lowest prevalence of emergency caesarean section, and was thus considered the reference hospital. The largest difference was found for Hospital 6, crude OR 4.75 (95% CI 3.49 to 6.46). When adjusting for potential confounders, the ORs for different hospitals were reduced, but still statistically significant (table 4, model 3). When checking for interaction, the body mass index modified the effect of hospitals. In Hospital 3, the OR decreased with increasing body mass index (body mass index  $\geq 30$ : OR 0.31, 95% CI 0.11 to 0.90), whereas the other hospitals had increased ORs with increasing body mass index.

Table 4: Logistic regression analysis of the association between sociodemographic and antenatal obstetric characteristics and the risk of emergency caesarean section among primiparous in the participating hospitals (N=8109)

|  | Crude OR | Model 1* | Model 2** | Model 3** |
|--|----------|----------|-----------|-----------|
|--|----------|----------|-----------|-----------|

|                                           | (95% CI)            | OR (95% CI)         | OR (95% CI)          | OR (95% CI)          |
|-------------------------------------------|---------------------|---------------------|----------------------|----------------------|
| <b>Hospitals</b>                          |                     |                     |                      |                      |
| Hospital 1                                | REF                 | REF                 | REF                  | REF                  |
| Hospital 2                                | 1.99 (1.45 to 2.72) | 1.90 (1.34 to 2.70) | 1.99 (1.44 to 2.75)  | 1.87 (1.30 to 2.68)  |
| Hospital 3                                | 2.40 (1.81 to 3.17) | 2.40 (1.73 to 3.33) | 2.43 (1.82 to 3.24)  | 2.47 (1.77 to 3.46)  |
| Hospital 4                                | 1.95 (1.42 to 2.67) | 2.33 (1.64 to 3.31) | 1.58 (1.11 to 2.25)  | 1.84 (1.24 to 2.73)  |
| Hospital 5                                | 2.87 (2.11 to 3.91) | 2.99 (2.12 to 4.22) | 2.49 (1.77 to 3.50)  | 2.53 (1.74 to 3.70)  |
| Hospital 6                                | 4.75 (3.49 to 6.46) | 4.28 (2.94 to 6.22) | 4.11 (2.87 to 5.90)  | 3.54 (2.29 to 5.47)  |
| <b>Maternal age (years)</b>               | 1.12 (1.10 to 1.13) | 1.12 (1.10 to 1.14) |                      | 1.12 (1.10 to 1.14)  |
| <b>Place of residence</b>                 |                     |                     |                      |                      |
| Urban/rural                               | REF                 | REF                 |                      | REF                  |
| Camp                                      | 1.22 (1.04 to 1.44) | 1.32 (1.08 to 1.61) |                      | 1.24 (1.01 to 1.53)  |
| <b>Education (years)</b>                  |                     |                     |                      |                      |
| ≤9                                        | REF                 | N/A****             |                      | N/A****              |
| 10 to 12                                  | 0.50 (0.41 to 0.62) |                     |                      |                      |
| ≥13                                       | 0.58 (0.47 to 0.72) |                     |                      |                      |
| <b>Body Mass Index (kg/m<sup>2</sup>)</b> |                     |                     |                      |                      |
| ≤24.9                                     | REF                 | REF                 |                      | REF                  |
| 25 to 29.9                                | 1.15 (0.91 to 1.46) | 1.17 (0.92 to 1.50) |                      | 1.12 (0.88 to 1.44)  |
| ≥30                                       | 1.50 (1.20 to 1.89) | 1.41 (1.10 to 1.81) |                      | 1.30 (1.01 to 1.68)  |
| <b>Antenatal visits (no)</b>              | 1.07 (1.05 to 1.10) |                     | 1.04 (1.01 to 1.07)  | 1.04 (1.01 to 1.07)  |
| <b>In vitro fertilization treatment</b>   |                     |                     |                      |                      |
| No                                        | REF                 |                     | REF                  | REF                  |
| Yes                                       | 5.93 (3.61 to 9.75) |                     | 6.62 (3.97 to 10.05) | 4.64 (2.66 to 8.08)  |
| <b>Hypertensive disorder</b>              |                     |                     |                      |                      |
| Yes                                       | REF                 |                     | REF                  | REF                  |
| No/unknown                                | 3.62 (2.75 to 4.77) |                     | 3.95 (2.96 to 5.28)  | 3.56 (2.61 to 4.86)  |
| <b>Induction of labour</b>                |                     |                     |                      |                      |
| Yes                                       | REF                 |                     | REF                  | REF                  |
| No/unknown                                | 1.49 (1.27 to 1.75) |                     | 1.33 (1.12 to 1.57)  | 1.32 (1.10 to 1.57)] |

\* Adjusted for sociodemographic characteristics (maternal age, place of residence, education and body mass index).

\*\* Adjusted for obstetric characteristics (antenatal visits, in vitro fertilization treatment, hypertensive disorder and induction of labour).

1  
2  
3 \*\*\* Adjusted for sociodemographic characteristics (age, place of  
4 residence, education, body mass index) and obstetric  
5 characteristics (antenatal visits, in vitro fertilization treatment,  
6 hypertensive disorder and induction of labour).  
7  
8  
9

10 \*\*\*\*N/A= not applicable due to multicollinearity.  
11  
12  
13  
14

15 A similar trend was found among parous women, but the differences between hospitals were  
16 less pronounced compared to primiparous women (table 5). After including sociodemographic  
17 and antenatal obstetric confounders in the model, the difference between the hospitals was  
18 less clear but still statistically significant for all hospitals, except Hospital 4. The strongest  
19 risk factor for emergency caesarean section was previous caesarean section (OR 6.26, 95%  
20 CI 5.57 to 7.05).  
21  
22  
23  
24  
25  
26  
27

28 Table 5: Logistic regression analysis of the association between sociodemographic and  
29 obstetric characteristics and the risk of emergency caesarean section among parous in the  
30 participating hospitals (N=24 210)  
31  
32  
33  
34

|                             | Crude OR<br>(95% CI) | Model 1*<br>OR (95% CI) | Model 2**<br>OR (95% CI) | Model 3**<br>OR (95% CI) |
|-----------------------------|----------------------|-------------------------|--------------------------|--------------------------|
| <b>Hospitals</b>            |                      |                         |                          |                          |
| Hospital 1                  | REF                  | REF                     | REF                      | REF                      |
| Hospital 2                  | 1.50 (1.23 to 1.83)  | 1.48 (1.19 to 1.84)     | 1.38 (1.12 to 1.70)      | 1.30 (1.04 to 1.63)      |
| Hospital 3                  | 1.75 (1.47 to 2.08)  | 1.80 (1.48 to 2.20)     | 1.50 (1.25 to 1.80)      | 1.53 (1.25 to 1.89)      |
| Hospital 4                  | 1.37 (1.13 to 1.67)  | 1.39 (1.12 to 1.72)     | 0.87 (0.70 to 1.09)      | 0.81 (0.64 to 1.04)      |
| Hospital 5                  | 2.56 (2.11 to 3.11)  | 2.61 (2.11 to 3.23)     | 1.89 (1.52 to 2.34)      | 1.70 (1.34 to 2.15)      |
| Hospital 6                  | 2.99 (2.44 to 3.65)  | 2.28 (1.78 to 2.93)     | 2.66 (2.12 to 3.34)      | 1.74 (1.32 to 2.31)      |
| <b>Maternal age</b> (years) | 1.05 (1.04 to 1.06)  | 1.05 (1.04 to 1.06)     |                          | 1.07 (1.05 to 1.08)      |
| <b>Place of residence</b>   |                      |                         |                          |                          |
| Urban/rural                 | REF                  | REF                     |                          | REF                      |
| Camp                        | 1.14 (1.01 to 1.29)  | 1.24 (1.07 to 1.43)     |                          | 1.19 (1.02 to 1.39)      |
| <b>Education</b> (years)    |                      |                         |                          |                          |
| ≤9                          | REF                  | REF                     |                          | REF                      |
| 10 to 12                    | 0.60 (0.53 to 0.68)  | 0.86 (0.74 to 1.01)     |                          | 0.79 (0.67 to 0.93)      |

|                                           |                     |                     |                     |                     |
|-------------------------------------------|---------------------|---------------------|---------------------|---------------------|
| ≥13                                       | 0.52 (0.45 to 0.60) | 0.73 (0.61 to 0.86) |                     | 0.62 (0.52 to 0.75) |
| <b>Body Mass Index (kg/m<sup>2</sup>)</b> |                     |                     |                     |                     |
| ≤24.9                                     | REF                 | REF                 |                     | REF                 |
| 25-29.9                                   | 1.25 (1.04 to 1.49) | 1.27 (1.05 to 1.53) |                     | 1.30 (1.07 to 1.58) |
| ≥30                                       | 1.38 (1.15 to 1.65) | 1.23 (1.02 to 1.49) |                     | 1.18 (0.97 to 1.43) |
| <b>Children alive (no)</b>                | 1.02 (1 to 1.05)    |                     | 1.03 (1 to 1.05)    | 0.90 (0.87 to 0.94) |
| <b>Previous caesarean section</b>         |                     |                     |                     |                     |
| 0                                         | REF                 |                     | REF                 | REF                 |
| 1                                         | 6.65 (5.98 to 7.39) |                     | 6.85 (6.12 to 7.65) | 6.26 (5.57 to 7.05) |
| <b>Antenatal visits (no)</b>              | 1.07 (1.05 to 1.09) |                     | 1.05 (1.03 to 1.07) | 1.06 (1.04 to 1.08) |
| <b>In vitro fertilization treatment</b>   |                     |                     |                     |                     |
| No                                        | REF                 |                     | REF                 | REF                 |
| Yes                                       | 2.69 (1.50 to 4.81) |                     | 2.13 (1.09 to 4.16) | 1.98 (0.98 to 3.99) |
| <b>Hypertensive disorder</b>              |                     |                     |                     |                     |
| Yes                                       | REF                 |                     | REF                 | REF                 |
| No/unknown                                | 2.98 (2.48 to 3.57) |                     | 3.18 (2.60 to 3.89) | 3.02 (2.45 to 3.73) |
| <b>Induction of labour</b>                |                     |                     |                     |                     |
| Yes                                       | REF                 |                     | REF                 | REF                 |
| No/unknown                                | 0.91 (0.78 to 1.05) |                     | 0.97 (0.83 to 1.14) | 0.95 (0.80 to 1.12) |

\* Adjusted for sociodemographic characteristics (maternal age, place of residence, education and body mass index).

\*\* Adjusted for obstetric characteristics (children alive, previous caesarean section, antenatal visits, in vitro fertilization treatment, hypertensive disorder and induction of labour).

\*\*\* Adjusted for sociodemographic characteristics (age, place of residence, education, body mass index) and obstetric characteristics characteristics (children alive, previous caesarean section, antenatal visits, in vitro fertilization treatment, hypertensive disorder and induction of labour).

\*\*\*\* N/A= not applicable due to multicollinearity.

Interactions by hospital were observed for previous caesarean section and for hypertensive disorder among parous women. The risk of emergency caesarean section was 15-17 fold for



1  
2  
3 women with previous caesarean section compared to no previous caesarean section in  
4  
5 Hospitals 2 and 6, whereas the other hospitals had a corresponding four-eightfold risk.  
6  
7 Furthermore, a tenfold risk was observed for women with hypertensive disorder compared to  
8  
9 those without hypertensive disorder in Hospital 1, whereas the other hospitals had a  
10  
11 corresponding two-fourfold risk of emergency caesarean section.  
12

### 13 **Discussion**

14  
15 There were notable variations between study hospitals in rate and risk for emergency caesarean  
16  
17 section among primiparous and parous women. Compared to the hospital with the lowest  
18  
19 prevalence for emergency caesarean section, the crude odds ratios were increased in all other  
20  
21 hospitals by up to almost fivefold for the primiparous and threefold for parous women. The  
22  
23 effect of sociodemographic and maternal antenatal obstetrical characteristics in risk for  
24  
25 emergency caesarean section is in line with previous research, confirming previous caesarean  
26  
27 section, hypertension disorder and in vitro fertilization treatment as the strongest risk factors  
28  
29 for emergency caesarean section.<sup>16,17</sup> So far this is the largest birth cohort study in Palestine,  
30  
31 including 32 321 women, and the first to focus on emergency caesarean section.  
32  
33

34  
35 Caesarean section may be life-saving for both the mother and the newborn, but overuse of  
36  
37 caesarean section does not improve maternal or perinatal health.<sup>4,19</sup> Immediate surgical  
38  
39 complications and adverse effects in future pregnancies, such as increased risk of intrauterine  
40  
41 fetal demise, preterm delivery, uterine abruption and abnormal placentation (praevia, accreta,  
42  
43 increta), are reasons why caesarean section should be performed when clinically indicated  
44  
45 only.<sup>4,20</sup> Increasing numbers of repeat caesarean sections increases the risk of severe  
46  
47 complications on the individual level. Knowing that a previous caesarean section increases the  
48  
49 risk for repeat caesarean section in the next pregnancy,<sup>21</sup> makes the management of the  
50  
51 delivery of a primiparous woman a true challenge in obstetrics.  
52  
53  
54  
55  
56  
57  
58  
59  
60

1  
2  
3 Large differences in caesarean section rates between hospitals may reflect varying skills and  
4 working methods. There are few previous studies on differences in caesarean section rates and  
5 risks between hospitals within the same country. A large study from England, compared 146  
6 National Health Service (NHS) trusts, including 620 604 singleton births.<sup>6</sup> The study showed  
7 that unadjusted rates of caesarean sections among the NHS trusts differed notably, ranging  
8 from 13.6% to 31.9%. After adjustment for maternal characteristics, the caesarean section rate  
9 still varied from 14.9% to 32.1%. The main differences in caesarean section rates between  
10 trusts appeared with emergency caesarean section; ranging from 10.7% to 18.9%, compared to  
11 elective caesarean section; ranging from 7.8% to 11.2%.<sup>6</sup> The authors suggested that the  
12 remaining differences in emergency caesarean section across NHS trusts could be due to lack  
13 of precise criteria for indications or differences in management practice, which could also be  
14 the case in this study.  
15  
16  
17  
18  
19  
20  
21  
22  
23  
24  
25  
26  
27

28 All hospitals in our study have a neonatal intensive care unit and five of six also have a  
29 maternal intensive care unit. Hospital 1 is not a referral hospital, and does not have a maternal  
30 intensive care unit for the delivering women. Thus, the lowest emergency caesarean section  
31 rate in this hospital may reflect a population with lower risk for complications. All six  
32 hospitals were governmental and five of the six were teaching hospitals. The non-teaching one,  
33 Hospital 2, had no educational program for the non-specialist doctors, which may lead to less  
34 qualified maternal care. However, this did not increase the risk for emergency caesarean  
35 section in this hospital.  
36  
37  
38  
39  
40  
41  
42  
43  
44  
45

46 A previous study from Norway showed that decision making for caesarean section delivery by  
47 consultants lowered the caesarean section rates.<sup>22</sup> On call arrangements for each hospital were  
48 not explored in this study and the decision making process for emergency caesarean section  
49 may vary across the study hospitals due to varying involvement of a specialist in obstetrics  
50 during non-office hours. In some of the study hospitals, a specialist in obstetrics is present in  
51  
52  
53  
54  
55  
56  
57  
58  
59  
60

1  
2  
3 the hospital all the time, whereas in others the specialists are available for consultations only,  
4  
5 and not present in the hospital during the evening and night. Differences in number of  
6  
7 consultations, residents and midwives may also affect the decision-making process. However,  
8  
9 numbers of consultant, residents and midwives, recorded in the previous study in these  
10  
11 hospitals, do not reflect a consistent effect on emergency caesarean section rates.<sup>13</sup>  
12  
13 In Palestine, there are common national guidelines for obstetrics and gynaecology,<sup>23</sup> but the  
14  
15 practical training of midwives and doctors may vary between hospitals. Given the large  
16  
17 differences in risk for emergency caesarean section, these guidelines may be applied  
18  
19 differently across hospitals due to differences in skills of medical staff causing different use of  
20  
21 caesarean section instead of operative vaginal delivery.<sup>24</sup> A study from the UK, including 216  
22  
23 maternity units, examined the variation in caesarean section rates between delivery units. The  
24  
25 study concluded that organizational factors and staffing levels, women's preferences for  
26  
27 delivery mode and the clinician's attitudes may explain the variations.<sup>25</sup> Medical doctors in  
28  
29 Palestine are neither insured by their employer nor by the Palestinian Ministry of Health, and  
30  
31 may therefore be sued privately if a pregnancy complication occurs. This may also affect their  
32  
33 use of emergency caesarean section. It is well known that the decision makers are affected by  
34  
35 their own fear, cultural factors, legal liability and medical evidence.<sup>26</sup> Also the fear of  
36  
37 perceived risk for complaints and malpractice litigation is associated with requested caesarean  
38  
39 section delivery.<sup>27</sup> In Sweden, caesarean section deliveries for non-medical reasons are 18% of  
40  
41 all caesarean sections, and this rate increased by 80% from 1990 to 2001.<sup>28</sup> Physicians'  
42  
43 attitudes are known to influence the parents' choice.<sup>26</sup> However, in governmental Palestinian  
44  
45 hospitals maternal request without medical reason is not a justified indication for caesarean  
46  
47 section.  
48  
49  
50  
51

### 52 *Strength and limitation of the study*

#### 54 *Strength*

1  
2  
3 The strength of this study is the population-based and prospective design. The data were  
4 collected for research purpose in a prospective manner. All women aiming to give birth  
5 vaginally in the six study hospitals were included, reducing the risk for selection bias. A large  
6 number of deliveries were included and six different hospitals were compared in Gaza and  
7 West Bank for the first time.  
8  
9  
10  
11  
12

### 13 *Limitation*

14  
15 The main limitation of this study was the missing data on some deliveries from March 2015  
16 until December 2015. In five of the six study hospitals less than 4% of data were missing, but  
17 in one hospital, Hospital 6, data was missing for 28% of its deliveries.<sup>13</sup> The missing data were  
18 expected to be random, not influencing the exposure-outcome associations studied. Data on  
19 diabetes before and during pregnancy, known to be associated with increased risk of  
20 emergency caesarean section,<sup>18</sup> were not registered accurately and could therefore not be used  
21 for analyses. Additionally, the effect of pre-pregnancy body mass index increased the risk for  
22 emergency caesarean section for primiparous women in hospitals except in Hospital 3, which  
23 could be due to inaccurate registration of maternal weight. Furthermore, inaccuracies could  
24 have affected the categorisation of place of residence.  
25  
26  
27  
28  
29  
30  
31  
32  
33  
34  
35  
36

### 37 **Conclusion**

38  
39 Major differences in rates and risks for emergency caesarean section were observed between  
40 the six governmental Palestinian hospitals. These could not be explained by differences in the  
41 studied sociodemographic or antenatal obstetrical characteristics. These findings may imply  
42 that factors related to doctors and their working environments are important in the decision to  
43 deliver by emergency caesarean section.  
44  
45  
46  
47  
48  
49

### 50 **Acknowledgements**

1  
2  
3 The Author would like to extend the best thanks and gratitude to the Norwegian Research  
4 Council for funding this study. We do thank the Palestinian Ministry of Health for supporting  
5 the study. We also appreciate the effort and time spent by research teams for data collection.  
6  
7

8  
9 **Contribution to authorship:**

10  
11 M. Zimmo: Charge of data collection, participated in staff training on data registration and  
12 entry, statistical analysis for the data set and drafted the manuscript.  
13

14  
15 K. Laine: Study design, protocol and research tool development, participated in staff training  
16 on data registration and entry and drafted the manuscript.  
17

18  
19 S. Hassan: Study design, collaborated in the preparation of the protocol and research tool  
20 development, data collection, participated in staff training on data registration and entry and  
21 commented on the manuscript.  
22  
23

24  
25 E. Fosse: Study design, protocol development and commented on the manuscript.  
26

27  
28 M. Lieng: commented on the manuscript.  
29

30  
31 K. Zimmo and H. Ali-Masri: Data collection, participated in staff training on data registration  
32 and entry and commented on the manuscript.  
33  
34

35  
36 M. Anti: commented on the manuscript.

37  
38 B. Bottcher: revise the medical English language and commented on the manuscript.

39  
40 R. Sørum Falk: Statistical analysis for the data set and commented on the manuscript.

41  
42 A. Vikanes: Study design, protocol and research tool development and participated in staff  
43 training on data registration and entry and commented on the manuscript.  
44

45  
46 All authors approved the final version.

47  
48 **Funding:** This work was supported by the Norwegian Research Council through Oslo  
49 University Hospital (234452/14). The funding source had no role in the study design, data  
50 collection, data analysis, data interpretation, or writing of the manuscript. All authors had full  
51  
52  
53  
54  
55  
56  
57  
58  
59  
60

1  
2  
3 access to all the data in the study and can take responsibility for the integrity and accuracy of  
4 the data analysis and they had final responsibility for the decision to submit for publication.

5  
6  
7 **Competing interest:** All authors have completed the ICMJE uniform disclosure form and  
8 have no conflict of interest to declare.

9  
10  
11 **Ethical approval:** This study was approved by the Norwegian Data Inspectorate (17/00082-  
12 2/GRA) and the Regional Committee for Medical and Health Research Ethics in South-Eastern  
13 Norway and was considered as health quality research (REK 2014/1727). Oslo University  
14 Hospital signed an agreement with the Palestinian Ministry of Health which approved  
15 conducting the study within their facilities. The project was done in accordance with common  
16 rules for health care services in Palestine and Norway regarding e.g. privacy.

17  
18  
19  
20  
21  
22  
23  
24 **Data sharing statement:** No additional data are available.  
25  
26  
27  
28  
29  
30  
31  
32  
33  
34  
35  
36  
37  
38  
39  
40  
41  
42  
43  
44  
45  
46  
47  
48  
49  
50  
51  
52  
53  
54  
55  
56  
57  
58  
59  
60

## References

1. Abalos E, Addo V, Brocklehurst P, et al. Caesarean section surgical techniques: 3 year follow-up of the CORONIS fractional, factorial, unmasked, randomised controlled trial. *Lancet* (London, England) 2016; **388**: 62-72.
2. Betrán AP, Ye J, Moller A-B, et al. The increasing trend in caesarean section rates: global, regional and national estimates: 1990-2014. *PloS one* 2016; **11**: e0148343.
3. Lumbiganon P, Laopaiboon M, Gülmezoglu AM, et al. Method of delivery and pregnancy outcomes in Asia: the WHO global survey on maternal and perinatal health 2007–08. *Lancet* 2010; **375**: 490-9.
4. Shorten A. Maternal and neonatal effects of caesarean section. *BMJ* 2007; **335**: 1003-4.
5. Kwee A, Elferink-Stinkens P, Reuwer P, et al. Trends in obstetric interventions in the Dutch obstetrical care system in the period 1993–2002. *European Journal of Obstetrics & Gynecology and Reproductive Biology* 2007; **132**: 70-5.
6. Bragg F, Cromwell DA, Edozien LC, et al. Variation in rates of caesarean section among English NHS trusts after accounting for maternal and clinical risk: cross sectional study. *BMJ* 2010; **341**: c5065.
7. Librero J, Peiró S, Calderón SM. Inter-hospital variations in caesarean sections. A risk adjusted comparison in the Valencia public hospitals. *Journal of epidemiology and community health* 2000; **54**: 631-6.
8. Habiba M, Kaminski M, Da Fre M, et al. Caesarean section on request: a comparison of obstetricians' attitudes in eight European countries. *BJOG: An International Journal of Obstetrics & Gynaecology* 2006; **113**: 647-56.

- 1  
2  
3 9. Abdul-Rahim H, Abu-Rmeileh N, Wick L. Cesarean section deliveries in the occupied  
4  
5 Palestinian territory (oPt): An analysis of the 2006 Palestinian Family Health Survey. *Health*  
6  
7 *policy December 2009*; **93**: 151-6.
- 8  
9 10. Mikki N, Abu Rmeileh N, Wick L, et al. Caesarean delivery rates, determinants and  
10  
11 indications in Makassed Hospital, Jerusalem 1993 and 2002. *Eastern Mediterranean Health*  
12  
13 *Journal July-August, 2009*; **15**: 868.
- 14  
15 11. P MoH. Health Status, Palestine 2015. In Ramallah, State of Palestine: Ministry of  
16  
17 Health: July 2016.
- 18  
19 12. Van den Berg MM, Madi HH, Khader A, et al. Increasing neonatal mortality among  
20  
21 Palestine refugees in the Gaza Strip. *PloS one 2015*; **10**: e0135092.
- 22  
23 13. Hassan S, Vikanes A, Laine K, et al. Building a research registry for studying birth  
24  
25 complications and outcomes in six Palestinian governmental hospitals. *BMC Pregnancy and*  
26  
27 *Childbirth 2017*; **17**: 1296-6.
- 28  
29 14. Jensen DM, Damm P, Sørensen B, et al. Pregnancy outcome and prepregnancy body  
30  
31 mass index in 2459 glucose-tolerant Danish women. *American journal of obstetrics and*  
32  
33 *gynecology 2003*; **189**: 239-44.
- 34  
35 15. Lucas D, Yentis S, Kinsella S, et al. Urgency of caesarean section: a new  
36  
37 classification. *Journal of the Royal Society of Medicine 2000*; **93**: 346-50.
- 38  
39 16. Leone T, Padmadas SS, Matthews Z. Community factors affecting rising caesarean  
40  
41 section rates in developing countries: an analysis of six countries. *Social science & medicine*  
42  
43 *2008*; **67**: 1236-46.
- 44  
45 17. Pandey S, Shetty A, Hamilton M, et al. Obstetric and perinatal outcomes in singleton  
46  
47 pregnancies resulting from IVF/ICSI: a systematic review and meta-analysis. *Human*  
48  
49 *reproduction update 2012*; **18**: 485-503
- 50  
51  
52  
53  
54  
55  
56  
57  
58  
59  
60



- 1  
2  
3 18. Ehrenberg HM, Mercer BM, Catalano PM. The influence of obesity and diabetes on  
4 the prevalence of macrosomia. *American journal of obstetrics and gynecology* 2004; **191**:  
5 964-8.  
6  
7  
8  
9 19. Deneux-Tharaux C, Carmona E, Bouvier-Colle M-H, et al. Postpartum maternal  
10 mortality and cesarean delivery. *Obstetrics & Gynecology* 2006; **108**(Part 1): 541-8.  
11  
12  
13 20. Field A, Haloob R. Complications of caesarean section. *The Obstetrician &*  
14 *Gynaecologist* 2016; **18**: 265-72.  
15  
16  
17 21. Lockwood C. Editorial Why the CD rate is on the rise (Part 1). *CONTEMPORARY OB*  
18 *GYN* 2004; **49**: 8.  
19  
20  
21 22. Nilsen ST, Bergsjö P, Lökling A, et al. A comparison of cesarean section frequencies  
22 in two Norwegian hospitals. *Acta obstetrica et gynecologica Scandinavica* 1983; **62**: 555-61.  
23  
24  
25 23. Kurd A, Belbisi A, Jaber S et al. Palestinian guidelines and protocols for Obstetricians,  
26 general practitioners and midwives. Preoperative preparation. Ramallah, State of Palestine:  
27 Palestinian National Authority, MOH November 2014: 191-3.  
28  
29  
30  
31 24. Sachs BP, Kobelin C, Castro MA, et al. The risks of lowering the cesarean-delivery  
32 rate. *The New England Journal of Medicine* 1999; **340**: 54-7.  
33  
34  
35  
36 25. Paranjothy S, Frost C, Thomas J. How much variation in CS rates can be explained by  
37 case mix differences? *BJOG: An International Journal of Obstetrics & Gynaecology* 2005;  
38 **112**: 658-66.  
39  
40  
41  
42 26. Belizán JM, Showalter E, Castro A, et al. Rates and implications of caesarean sections  
43 in Latin America: ecological study  
44 Commentary: all women should have a choice  
45  
46 Commentary: increase in caesarean sections may reflect medical control not women's choice  
47  
48  
49  
50  
51  
52  
53  
54  
55  
56  
57  
58  
59  
60

1  
2  
3 27. Fuglenes D, Øian P, Kristiansen IS. Obstetricians' choice of cesarean delivery in  
4 ambiguous cases: is it influenced by risk attitude or fear of complaints and litigation?

5  
6  
7 *American journal of obstetrics and gynecology* 2009; **200**: 48. e1-. e8.

8  
9 28. Elvander C, Dahlberg J, Andersson G, et al. Mode of delivery and the probability of  
10 subsequent childbearing: a population-based register study. *BJOG* 2015; **122**:1593-600.  
11  
12  
13  
14  
15  
16  
17  
18  
19  
20  
21  
22  
23  
24  
25  
26  
27  
28  
29  
30  
31  
32  
33  
34  
35  
36  
37  
38  
39  
40  
41  
42  
43  
44  
45  
46  
47  
48  
49  
50  
51  
52  
53  
54  
55  
56  
57  
58  
59  
60

For peer review only

1  
2  
3  
4  
5  
6  
7  
8  
9  
10  
11  
12  
13  
14  
15  
16  
17  
18  
19  
20  
21  
22  
23  
24  
25  
26  
27  
28  
29  
30  
31  
32  
33  
34  
35  
36  
37  
38  
39  
40  
41  
42  
43  
44  
45  
46  
47  
48  
49  
50  
51  
52  
53  
54  
55  
56  
57  
58  
59  
60

Figure 1: Flow chart of the selected study population, multicenter study from Palestine

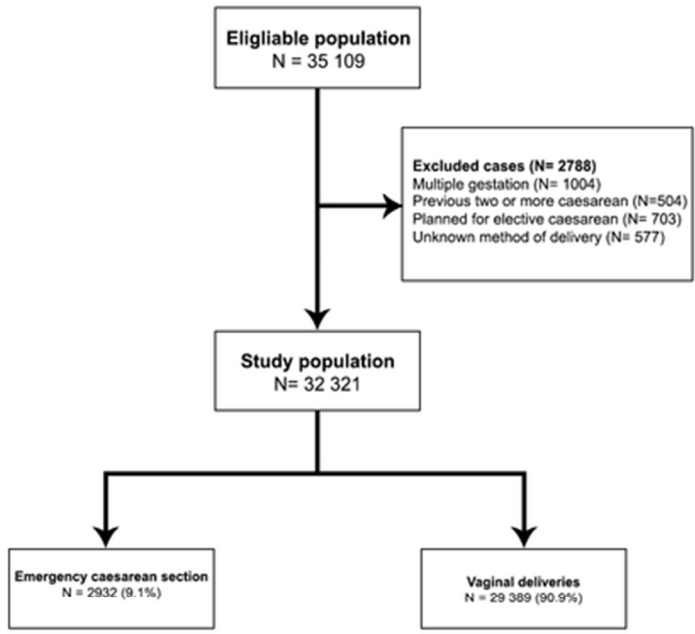

24x20mm (600 x 600 DPI)

View only

**STROBE 2007 (v4) Statement—Checklist of items that should be included in reports of *cohort studies***

| Section/Topic            | Item # | Recommendation                                                                                                                                                                       | Reported on page #                                                |
|--------------------------|--------|--------------------------------------------------------------------------------------------------------------------------------------------------------------------------------------|-------------------------------------------------------------------|
| Title and abstract       | 1      | (a) Indicate the study's design with a commonly used term in the title or the abstract                                                                                               | Within the title page 1 and method section of the abstract page 2 |
|                          |        | (b) Provide in the abstract an informative and balanced summary of what was done and what was found                                                                                  | results section of abstract page 2                                |
| <b>Introduction</b>      |        |                                                                                                                                                                                      |                                                                   |
| Background/rationale     | 2      | Explain the scientific background and rationale for the investigation being reported                                                                                                 | page 4                                                            |
| Objectives               | 3      | State specific objectives, including any prespecified hypotheses                                                                                                                     | page 4-5                                                          |
| <b>Methods</b>           |        |                                                                                                                                                                                      |                                                                   |
| Study design             | 4      | Present key elements of study design early in the paper                                                                                                                              | Abstract page 2 and Methods page 5                                |
| Setting                  | 5      | Describe the setting, locations, and relevant dates, including periods of recruitment, exposure, follow-up, and data collection                                                      | pages 5 and 6                                                     |
| Participants             | 6      | (a) Give the eligibility criteria, and the sources and methods of selection of participants. Describe methods of follow-up                                                           | pages 5                                                           |
|                          |        | (b) For matched studies, give matching criteria and number of exposed and unexposed                                                                                                  |                                                                   |
| Variables                | 7      | Clearly define all outcomes, exposures, predictors, potential confounders, and effect modifiers. Give diagnostic criteria, if applicable                                             | pages 6-7                                                         |
| Data sources/measurement | 8*     | For each variable of interest, give sources of data and details of methods of assessment (measurement). Describe comparability of assessment methods if there is more than one group | pages 5                                                           |
| Bias                     | 9      | Describe any efforts to address potential sources of bias                                                                                                                            | N/A                                                               |
| Study size               | 10     | Explain how the study size was arrived at                                                                                                                                            |                                                                   |
| Quantitative variables   | 11     | Explain how quantitative variables were handled in the analyses. If applicable, describe which groupings were chosen and why                                                         | Pages 6                                                           |
| Statistical methods      | 12     | (a) Describe all statistical methods, including those used to control for confounding                                                                                                | Pages 6                                                           |

|                          |     |                                                                                                                                                                                                              |                          |
|--------------------------|-----|--------------------------------------------------------------------------------------------------------------------------------------------------------------------------------------------------------------|--------------------------|
|                          |     | (b) Describe any methods used to examine subgroups and interactions                                                                                                                                          | Pages 7                  |
|                          |     | (c) Explain how missing data were addressed                                                                                                                                                                  | N/A                      |
|                          |     | (d) If applicable, explain how loss to follow-up was addressed                                                                                                                                               | N/A                      |
|                          |     | (e) Describe any sensitivity analyses                                                                                                                                                                        | Pages 7                  |
| <b>Results</b>           |     |                                                                                                                                                                                                              |                          |
| Participants             | 13* | (a) Report numbers of individuals at each stage of study—eg numbers potentially eligible, examined for eligibility, confirmed eligible, included in the study, completing follow-up, and analysed            | pages 8 and figure 1     |
|                          |     | (b) Give reasons for non-participation at each stage                                                                                                                                                         | N/A                      |
|                          |     | (c) Consider use of a flow diagram                                                                                                                                                                           | Figure 1                 |
| Descriptive data         | 14* | (a) Give characteristics of study participants (eg demographic, clinical, social) and information on exposures and potential confounders                                                                     | pages 8-9 and tables 1-2 |
|                          |     | (b) Indicate number of participants with missing data for each variable of interest                                                                                                                          | Tables 1-2               |
|                          |     | (c) Summarise follow-up time (eg, average and total amount)                                                                                                                                                  | N/A                      |
| Outcome data             | 15* | Report numbers of outcome events or summary measures over time                                                                                                                                               | Tables 3                 |
| Main results             | 16  | (a) Give unadjusted estimates and, if applicable, confounder-adjusted estimates and their precision (eg, 95% confidence interval). Make clear which confounders were adjusted for and why they were included | pages 11-14; table 4-5   |
|                          |     | (b) Report category boundaries when continuous variables were categorized                                                                                                                                    | N/A                      |
|                          |     | (c) If relevant, consider translating estimates of relative risk into absolute risk for a meaningful time period                                                                                             | N/A                      |
| Other analyses           | 17  | Report other analyses done—eg analyses of subgroups and interactions, and sensitivity analyses                                                                                                               | Page 14                  |
| <b>Discussion</b>        |     |                                                                                                                                                                                                              |                          |
| Key results              | 18  | Summarise key results with reference to study objectives                                                                                                                                                     | Page 14                  |
| <b>Limitations</b>       |     |                                                                                                                                                                                                              |                          |
| Interpretation           | 20  | Give a cautious overall interpretation of results considering objectives, limitations, multiplicity of analyses, results from similar studies, and other relevant evidence                                   | Pages 14-17              |
| Generalisability         | 21  | Discuss the generalisability (external validity) of the study results                                                                                                                                        | pages 5 and 14           |
| <b>Other information</b> |     |                                                                                                                                                                                                              |                          |
| Funding                  | 22  | Give the source of funding and the role of the funders for the present study and, if applicable, for the original study on which the present article is based                                                | Page 19                  |

\*Give information separately for cases and controls in case-control studies and, if applicable, for exposed and unexposed groups in cohort and cross-sectional studies.

1  
2  
3  
4  
5 **Note:** An Explanation and Elaboration article discusses each checklist item and gives methodological background and published examples of transparent reporting. The STROBE  
6 checklist is best used in conjunction with this article (freely available on the Web sites of PLoS Medicine at <http://www.plosmedicine.org/>, Annals of Internal Medicine at  
7 <http://www.annals.org/>, and Epidemiology at <http://www.epidem.com/>). Information on the STROBE Initiative is available at [www.strobe-statement.org](http://www.strobe-statement.org).  
8  
9  
10  
11  
12  
13  
14  
15  
16  
17  
18  
19  
20  
21  
22  
23  
24  
25  
26  
27  
28  
29  
30  
31  
32  
33  
34  
35  
36  
37  
38  
39  
40  
41  
42  
43  
44  
45  
46  
47

For peer review only

### Pre-submission checklist

In order to reduce the chance of your manuscript being returned to you, please check:

(√) **Author information:** Have you provided details of all of your co-authors? Is the information that you have entered into Scholar One the same as the information on the manuscript title page?

(√) **Manuscript length and formatting:** Have you checked that your manuscript doesn't exceed the requirements for word count, number of tables and/or figures, and number of references? Have you provided your abstract in the correct format? Have you supplied any required additional information for your article type, such as key messages?

(√) **Tables:** Have you embedded any tables into the main text? Have they been cited in the text? Have you provided appropriate table legends? Have you uploaded any lengthy tables as supplementary files for online publication?

(√) **Figures:** Have you uploaded any figures separately from the text? Have they been supplied in an acceptable format and are they of sufficient quality? Are they suitable for black and white reproduction (unless you intend to pay any required fees for color printing)? Have the files been labelled appropriately? Have the figures been cited in the text? Have you provided appropriate figure legends?

(√) **References:** Have all of the references been cited in the text?

(√) **Supplementary files and appendices:** Have you supplied these in an acceptable format? Have they been cited in the main text?

(√) **Statements:** Have you included the necessary statements relating to contributorship, competing interests, data sharing and ethical approval?

(√) **Research reporting checklists:** Have you either provided the appropriate statement for your study type, or explained why a checklist isn't required?

(√) **Permissions:** Have you obtained from the copyright holder to re-use any previously published material? Has the source been acknowledged?

(√) **Reviewers:** Have you provided the names of any preferred and non-preferred reviewers?

(√) **Revised manuscripts:** Have you supplied both a marked copy and a clean copy of your manuscript? Have you provided a point by point response to the reviewer and editor comments?

1  
2  
3 **Information required for all authors submitting a manuscript to any BMJ journal:**  
4  
5

6 (√) Manuscript files in the appropriate format, including a cover letter and title page  
7

8 (√) Details of any co-authors (name, institution, city, country and email address)  
9

10 (√) Details of preferred reviewers (name and email address)  
11

12 (√) Word count, number of figures, number of tables, number of references and number of  
13

14 (√) supplementary files for online only publication  
15

16 (√) Competing interest statement  
17

18 (√) Contributorship statement  
19  
20  
21  
22  
23  
24  
25  
26  
27  
28  
29  
30  
31  
32  
33  
34  
35  
36  
37  
38  
39  
40  
41  
42  
43  
44  
45  
46  
47  
48  
49  
50  
51  
52  
53  
54  
55  
56  
57  
58  
59  
60



# BMJ Open

## Differences in rates and risks for emergency caesarean section in six Palestinian hospitals: a population based birth cohort study

|                                 |                                                                                                                                                                                                                                                                                                                                                                                                                                                                                                                                                                                                                                                                                                                                                                                                                                                                                                                                                                                                                                                                                                                                                                                                                                                                                                                                                                                                                                                                                                           |
|---------------------------------|-----------------------------------------------------------------------------------------------------------------------------------------------------------------------------------------------------------------------------------------------------------------------------------------------------------------------------------------------------------------------------------------------------------------------------------------------------------------------------------------------------------------------------------------------------------------------------------------------------------------------------------------------------------------------------------------------------------------------------------------------------------------------------------------------------------------------------------------------------------------------------------------------------------------------------------------------------------------------------------------------------------------------------------------------------------------------------------------------------------------------------------------------------------------------------------------------------------------------------------------------------------------------------------------------------------------------------------------------------------------------------------------------------------------------------------------------------------------------------------------------------------|
| Journal:                        | <i>BMJ Open</i>                                                                                                                                                                                                                                                                                                                                                                                                                                                                                                                                                                                                                                                                                                                                                                                                                                                                                                                                                                                                                                                                                                                                                                                                                                                                                                                                                                                                                                                                                           |
| Manuscript ID                   | bmjopen-2017-019509.R1                                                                                                                                                                                                                                                                                                                                                                                                                                                                                                                                                                                                                                                                                                                                                                                                                                                                                                                                                                                                                                                                                                                                                                                                                                                                                                                                                                                                                                                                                    |
| Article Type:                   | Research                                                                                                                                                                                                                                                                                                                                                                                                                                                                                                                                                                                                                                                                                                                                                                                                                                                                                                                                                                                                                                                                                                                                                                                                                                                                                                                                                                                                                                                                                                  |
| Date Submitted by the Author:   | 26-Dec-2017                                                                                                                                                                                                                                                                                                                                                                                                                                                                                                                                                                                                                                                                                                                                                                                                                                                                                                                                                                                                                                                                                                                                                                                                                                                                                                                                                                                                                                                                                               |
| Complete List of Authors:       | Zimmo, Mohammed; Department of Obstetrics, Al Shifa Hospital, Gaza, Palestine, obstetrics and gynaecology; Institute for clinical medicine, Faculty of Medicine, University of Oslo, Oslo, Norway, Department of Obstetrics<br>Laine, Katariina; Oslo University Hospital, Department of Obstetrics; University of Oslo, Department of Health Management and Health Economics, Institute of Health and Society<br>Hassan, Sahar; Institute of Community and Public Health, Birzeit University, Palestine; Faculty of Nursing, Pharmacy and Health Professions, Birzeit University, Palestine<br>Fosse, Erik; The Intervention Centre, Oslo University Hospital Rikshospitalet, Oslo, Norway; Institute for clinical medicine, Faculty of Medicine, University of Oslo, Oslo, Norway<br>Lieng, Marit; Oslo University Hospital, Ullevål, Department of Obstetrics<br>Ali-Masri, Hadil; Department of Obstetrics, Palestine Medical Complex hospital, Ramallah, Palestine; Institute for clinical medicine, Faculty of Medicine, University of Oslo, Oslo, Norway<br>zimmo, kaled; Al Aqsa Hospital, Obstetrics Department; Intervention Centre, Oslo University Hospital Rikshospitalet<br>Anti, Marit; Hoyskolen Campus Kristiania Markedshoyskolen<br>Bottcher, Bettina.; Faculty of Medicine<br>Sørum Falk, Ragnhild; Research Support Services, Oslo University Hospital, Oslo Centre for Biostatistics and Epidemiology<br>Vikanes, Åse; Intervention Centre, Oslo University Hospital Rikshospitalet |
| <b>Primary Subject Heading</b>: | Obstetrics and gynaecology                                                                                                                                                                                                                                                                                                                                                                                                                                                                                                                                                                                                                                                                                                                                                                                                                                                                                                                                                                                                                                                                                                                                                                                                                                                                                                                                                                                                                                                                                |
| Secondary Subject Heading:      | Health services research, Obstetrics and gynaecology                                                                                                                                                                                                                                                                                                                                                                                                                                                                                                                                                                                                                                                                                                                                                                                                                                                                                                                                                                                                                                                                                                                                                                                                                                                                                                                                                                                                                                                      |
| Keywords:                       | Maternal medicine < OBSTETRICS, OBSTETRICS, Prenatal diagnosis < OBSTETRICS                                                                                                                                                                                                                                                                                                                                                                                                                                                                                                                                                                                                                                                                                                                                                                                                                                                                                                                                                                                                                                                                                                                                                                                                                                                                                                                                                                                                                               |
|                                 |                                                                                                                                                                                                                                                                                                                                                                                                                                                                                                                                                                                                                                                                                                                                                                                                                                                                                                                                                                                                                                                                                                                                                                                                                                                                                                                                                                                                                                                                                                           |

SCHOLARONE™  
Manuscripts

## Differences in rates and risks for emergency caesarean section in six

### Palestinian hospitals: a population-based birth cohort study

Mohammed W. Zimmo, MD, MD, PhD candidate,<sup>1-3</sup> Katariina Laine, MD, PhD,<sup>4,5</sup> Sahar Hassan, PhD,<sup>6</sup> Erik Fosse, MD, PhD,<sup>2,3</sup> Marit Lieng, MD, PhD,<sup>2,7</sup> Hadil Ali-Masri, MD, PhD candidate,<sup>2,3,8</sup> Kaled Zimmo, MD, PhD candidate,<sup>2,3,9</sup> Marit Anti, PhD,<sup>10</sup> Bettina Bottcher, PhD,<sup>11</sup> Ragnhild Sørnum Falk, PhD,<sup>12</sup> Åse Vikanes, PhD<sup>3</sup>

#### Addresses:

<sup>1</sup>Obstetrics Department, Al Shifa Hospital, Gaza, Palestine

<sup>2</sup>Institute for Clinical Medicine, Faculty of Medicine, University of Oslo, Norway

<sup>3</sup>Intervention Centre, Oslo University Hospital Rikshospitalet, Oslo, Norway

<sup>4</sup>Department of Obstetrics, Oslo University Hospital, Ullevål, Oslo, Norway

<sup>5</sup>Department of Health Management and Health Economics, Institute of Health and Society, University of Oslo, Norway

<sup>6</sup>Faculty of Pharmacy, Nursing, and Health Professions, Birzeit University, Palestine

<sup>7</sup>Department of Gynaecology, Oslo University Hospital, Ullevål, Oslo, Norway

<sup>8</sup>Obstetrics Department, Palestine Medical complex, West Bank, Palestine

<sup>9</sup>Obstetrics Department, Al Aqsa Hospital, Gaza, Palestine

<sup>10</sup>Oslo School of Management, Oslo, Norway

<sup>11</sup>Faculty of Medicine, Islamic University, Gaza, Palestine

<sup>12</sup>Oslo Centre for Biostatistics and Epidemiology, Research Support Services, Oslo University Hospital, Oslo, Norway

#### Corresponding author:

Mohammed Walid Zimmo

Word count: 3511

241/47 Gaza, Palestine

Tables No.: 5

Mobile No.: +972595325896

Supplementary figure: 1

E-mail address: [mohammedzimmo1983@gmail.com](mailto:mohammedzimmo1983@gmail.com)

References No.: 29

**Keywords:** caesarean section, emergency, Palestine, rate, risk factor.

## Abstract

**Objective:** To assess the differences in rates and risks for emergency caesarean section among singleton pregnancies in six governmental Palestinian hospitals.

**Design:** A prospective population-based birth cohort study.

**Setting:** Obstetric departments in six governmental Palestinian hospitals.

**Participants:** 32 321 women scheduled to deliver vaginally from 1 March 2015, until 29 February 2016.

**Methods:** To assess differences in sociodemographic and antenatal obstetric characteristics by hospital, chi-square test, ANOVA analysis and Kruskal-Wallis test were applied. Logistic regression was used to estimate differences in risk for emergency caesarean section, odds ratios (OR) with 95% confidence intervals (CI) were assessed.

## Main outcome measures

The primary outcome was the adjusted odds ratios of emergency caesarean section among singleton pregnancies for five Palestinian hospitals as compared to the reference (Hospital 1).

**Results:** The prevalence of emergency caesarean section varied across hospitals, ranging from 5.8% and 22.6% among primiparous women, and between 4.8% and 13.1% among parous women. Compared to the reference hospital the risks for emergency caesarean section were increased in all other hospitals; crude ORs ranging from 1.95 (95% CI 1.42–2.67) to 4.75 (95% CI 3.49–6.46) among primiparous women. For parous women these differences were less pronounced; crude ORs ranging from 1.37 (95% CI 1.13–1.67) to 2.99 (95% CI 2.44–3.65). After adjustment for potential confounders, the ORs were reduced but still statistically significant, except for one hospital among parous women.

1  
2  
3 **Conclusion:** Substantial differences in risk for emergency caesarean section between the six  
4  
5 Palestinian governmental hospitals were observed. These could not be explained by the  
6  
7 studied sociodemographic or antenatal obstetric characteristics.  
8

9 *Strengths and limitations of the study*  
10

- 11 • This study is the largest, population-based, prospective birth cohort study in Palestine,  
12 which includes both Gaza and West Bank hospitals  
13
- 14 • All singleton pregnant women aiming to give birth vaginally in the six study hospitals  
15 were included, reducing the risk for selection bias.  
16
- 17 • The main limitation of this study was the large proportion of missing data on deliveries  
18 in one of the study hospitals. The missing data were expected to be random, and  
19 therefore not influencing the exposure-outcome associations studied.  
20
- 21 • Data on diabetes before and during pregnancy were not registered accurately and could  
22 therefore not be used for analyses.  
23
- 24 • Inaccurate registration of maternal weight and place of residence in some hospitals.  
25  
26  
27  
28  
29  
30  
31  
32  
33  
34  
35  
36  
37  
38  
39  
40  
41  
42  
43  
44  
45  
46  
47  
48  
49  
50  
51  
52  
53  
54  
55  
56  
57  
58  
59  
60

## Introduction

Caesarean section is one of the most common surgical procedures worldwide.<sup>1</sup> The rate of caesarean section has increased globally from 7% in 1990 to 19% in 2014.<sup>2</sup> This increase in caesarean section rates is, however, not associated with improved outcomes for mothers and newborns.<sup>3</sup> Although delivery by caesarean section is considered safe, it is associated with adverse short term as well as long term consequences for mothers and children.<sup>4</sup> The most worrying rise in caesarean section rate is therefore seen among healthy primiparous women with singleton pregnancies at term, who were having a low risk of caesarean section. This rise was significantly higher in women who underwent induction of labor.<sup>5</sup>

Despite international evidence-based guidelines for indications of caesarean section, the caesarean section rates vary between countries (from 5% in Sub-Saharan Africa to around 40% in Latin America) and even between hospitals within the same countries.<sup>2,6</sup> A study found that different caesarean section rates in National Health Service (NHS) Trusts in the UK were mainly restricted to emergency caesarean section and not to planned caesarean sections.<sup>6</sup> Another study reported that differences in maternal or fetal risk factors do not explain the variations in caesarean section rates.<sup>7</sup> Healthcare professionals decision to perform caesarean section is known to be influenced by cultural factors, legal liability as well as medical evidence.<sup>8</sup>

In Palestine, two previous studies on caesarean section rates have been published.<sup>9,10</sup> A study from Makassed Charitable Hospital in East Jerusalem, including 6804 women showed that the caesarean section rate increased from 9.4% to 14.4% between 1993 and 2002.<sup>10</sup> Another study in 2006, using data from the Palestinian Family Health Survey of 6113 women from Gaza and the West Bank, reported an increase in caesarean section rates from 6.0% in 1996 to 14.8% in 2006.<sup>9</sup> Both studies lacked information on potential confounders. According to the Palestinian Ministry of Health in 2015, the overall caesarean section rate was 23.2%.<sup>11</sup> Since these studies

1  
2  
3 were published, the political situation in the occupied Palestinian Territories has become more  
4  
5 challenging given the siege on Gaza, which is recently reported to influence health services.<sup>12</sup>  
6

7 The main aim of this study was to explore any differences in rates and risks for emergency  
8  
9 caesarean section among singleton pregnancies in six governmental hospitals in Palestine.  
10

## 11 **Methods**

12  
13 The data were obtained from a population-based birth cohort study in six Palestinian  
14  
15 governmental hospitals from 1 March 2015, until 29 February 2016. Three hospitals (1, 2 and  
16  
17 3) were located in Gaza and three (4, 5 and 6) in the West Bank. All hospitals were teaching  
18  
19 hospitals except one (Hospital 2). Teaching hospitals in Palestine have educational programs  
20  
21 for health personnel; such as nurses, midwives and medical doctors. All were referral  
22  
23 hospitals, except one (Hospital 1). Referral hospitals in Palestine receive patients from other  
24  
25 governmental or private hospitals in the neighbouring areas. Hospital 1, being non-referral,  
26  
27 was the only one without a maternal intensive care unit.  
28  
29

30  
31 All women planned for vaginal delivery were included in the study. Women planned for  
32  
33 elective caesarean section, those with two or more previous caesarean sections, multiple  
34  
35 gestations and those with missing information about the actual mode of delivery were  
36  
37 excluded from the study sample (see online supplementary figure 1).  
38

### 39 *Data collection and entry*

40  
41  
42 A case registration form, developed by Palestinian and Norwegian obstetricians and  
43  
44 midwives, was used to collect data on maternal sociodemographic, antenatal obstetric  
45  
46 characteristics and mode of delivery prospectively.<sup>13</sup> Before the data collection started,  
47  
48 research teams in each hospital were established, comprising the heads of obstetric  
49  
50 departments, medical doctors and midwives working in the labour wards. The case  
51  
52 registration form was filled in by doctors and midwives attending the births. The registered  
53  
54 data were entered by research teams into a tailor made version of District Health Information  
55  
56  
57  
58  
59  
60

1  
2  
3 Software 2 (DHIS2, version 2.24). DHIS 2 has been created by the Department of Global  
4  
5 Infrastructure at the University of Oslo. It is a free, adaptable web-based open-source  
6  
7 information system tool developed with support from the Norwegian Agency for  
8  
9 Development (NORAD). Data were transferred from DHIS2 to be stored in Service for  
10  
11 Sensitive Data (TSD) platform which is developed and operated by the University of Oslo for  
12  
13 researchers to collect, store, analyse and share sensitive data in compliance with the  
14  
15 Norwegian regulations regarding individuals' privacy (tsd-drift@usit.uio.no).

### 16 17 *Risk factors*

18  
19 Data on maternal pre-pregnancy weight and height were obtained from the mother and child  
20  
21 health handbook and if the booklet was unavailable, the medical teams obtained this  
22  
23 information by asking the women.

24  
25 Maternal age was categorized into five-year age groups (table 1). Place of residence was  
26  
27 dichotomised into camp or urban-rural area. Maternal education was categorised into three  
28  
29 groups according to length of education (table 1). Pre-pregnancy body mass index was  
30  
31 categorised according to the World Health Organization classification:  $\leq 18.5$ , 18.5-24.9, 25.0-  
32  
33 29.9 and  $\geq 30.0$  kg/m<sup>2</sup>.<sup>14</sup> Mode of delivery was dichotomised into vaginal (normal and assisted  
34  
35 vaginal) and emergency caesarean section.

36  
37 Parity was dichotomised into primiparous and parous women. Primiparous women have had  
38  
39 no previous delivery, whereas parous women had one or more previous deliveries. Previous  
40  
41 caesarean section was dichotomised into no/yes. Number of antenatal visits was categorised  
42  
43 into four groups:  $<3$ , 4-7,  $\geq 8$  visits. In vitro fertilisation treatment was dichotomised into  
44  
45 no/yes. Hypertensive disorder, which included hypertension before as well as during  
46  
47 pregnancy and preeclampsia, was dichotomised into no/yes. Induction of labour, by  
48  
49 misoprostol or balloon catheter, was dichotomised into no/yes. Unknown information of  
50  
51 hypertensive disorder and induction of labour were considered as no disorder/induction.  
52  
53  
54  
55  
56  
57  
58  
59  
60

### *Outcomes*

The primary outcome was the adjusted odds ratios of emergency caesarean section among singleton pregnancies for five Palestinian hospitals as compared to the reference (Hospital 1). Emergency caesarean section covered a wide range of clinical situations from an immediate threat to the mother or baby to conditions requiring early delivery. The criteria for emergency caesarean section in this study reflect Lucas urgency classification one, two and three.<sup>15</sup>

### *Statistical analysis*

Descriptive analyses were conducted for the baseline characteristics of the women. To assess differences by hospitals, comparison of proportions was tested by chi-square test, differences in means by one-way ANOVA analysis and differences in median by Kruskal-Wallis test.

In order to study the effect of the hospital on the risk of emergency caesarean section, logistic regression analyses were applied; stratified according to parity. Age, place of residence, education, body mass index, number of children alive, previous caesarean section, number of antenatal visits, in vitro fertilisation treatment, hypertensive disorder and induction of labour were included as potential confounders. The strength of the association between each variable and the risk of emergency caesarean section was estimated by odds ratios (ORs) with 95% confidence intervals (CIs). Due to low numbers in categories,  $\leq 18.5$  and  $18.5-24.9$  kg/m<sup>2</sup> of body mass index, they merged into one group in regression analyses.

Multicollinearity of independent variables was checked via the variance inflation factor statistic. For primiparous women, education had to be excluded due to multicollinearity. We found no multicollinearity among parous women. Interaction between hospital and the adjusting variables were explored by entering product terms, one at a time, into the model.

Interactions with  $p < 0.001$  were reported in the text.

P values  $< 0.05$  were considered statistically significant. All statistical analyses were performed using SPSS 22 (SPSS Inc., Chicago, IL, USA).



## Results

During the study period 35 109 women gave birth. In total 32 321 singleton pregnant women were planned for vaginal birth and included in this study. Of these women, 2932 (9.1%) were delivered by emergency caesarean section.

Significant differences were found between the hospitals for maternal age, place of residence, education and body mass index; all p-values <0.001. Hospital 3 had the largest proportion of the youngest women giving birth with 17.3% being 20 years old or younger. In contrast, Hospital 2 had the largest proportion of the oldest women delivering, where approximately 2% were aged 40 years or more.

There were significant differences between hospitals regarding women living in refugee camps ranging from 0.3% in Hospital 4 to 41.2% in Hospital 3. Almost 60% had between 10-12 years of education, ranging from 34.6% in Hospital 6 to 64.6% in Hospital 3. More than 80% (27 172) of the women had a body mass index  $\geq 25$  kg/m<sup>2</sup> (table 1).

Table 1: Sociodemographic characteristics of the study population (N=32 321)

|                           | Gaza                            |                                 |                                   | West Bank                       |                                 |                                 | p value* |
|---------------------------|---------------------------------|---------------------------------|-----------------------------------|---------------------------------|---------------------------------|---------------------------------|----------|
|                           | Hospital 1<br>(N=4674)<br>N (%) | Hospital 2<br>(N=4895)<br>N (%) | Hospital 3<br>(N=10 849)<br>N (%) | Hospital 4<br>(N=5519)<br>N (%) | Hospital 5<br>(N=3626)<br>N (%) | Hospital 6<br>(N=2758)<br>N (%) |          |
| <b>Maternal age</b>       |                                 |                                 |                                   |                                 |                                 |                                 |          |
| ≤20                       | 519 (11.8)                      | 472 (9.9)                       | 1823 (17.3)                       | 839 (15.2)                      | 380 (10.5)                      | 305 (11.3)                      | <0.001   |
| 21-25                     | 1669 (37.9)                     | 1570 (32.9)                     | 4058 (38.5)                       | 1845 (33.5)                     | 1367 (37.9)                     | 1067 (39.6)                     |          |
| 26-30                     | 1230 (28.0)                     | 1440 (30.2)                     | 2616 (24.8)                       | 1401 (25.4)                     | 1021 (28.3)                     | 708 (26.3)                      |          |
| 31-35                     | 628 (14.3)                      | 818 (17.2)                      | 1293 (12.3)                       | 849 (15.4)                      | 562 (15.6)                      | 395 (14.7)                      |          |
| 36-40                     | 285 (6.5)                       | 369 (7.7)                       | 590 (5.6)                         | 481 (8.7)                       | 218 (6.0)                       | 179 (6.6)                       |          |
| >40                       | 69 (1.6)                        | 98 (2.1)                        | 158 (1.5)                         | 98 (1.8)                        | 58 (1.6)                        | 40 (1.5)                        |          |
| Missing                   | 274                             | 128                             | 311                               | 6                               | 20                              | 64                              |          |
| <b>Place of residence</b> |                                 |                                 |                                   |                                 |                                 |                                 |          |
| Urban/rural               | 3636 (84.4)                     | 4640 (97.0)                     | 6333 (58.8)                       | 5498 (99.7)                     | 3516 (97.2)                     | 2548 (93.6)                     | <0.001   |
| Camp                      | 673 (15.6)                      | 144 (3.0)                       | 4436 (41.2)                       | 14 (0.3)                        | 100 (2.8)                       | 175 (6.4)                       |          |
| Missing                   | 365                             | 111                             | 80                                | 7                               | 10                              | 35                              |          |
| <b>Education,</b>         |                                 |                                 |                                   |                                 |                                 |                                 |          |

|                        |             |             |             |             |             |             |        |
|------------------------|-------------|-------------|-------------|-------------|-------------|-------------|--------|
| <b>(years)</b>         |             |             |             |             |             |             |        |
| ≤9                     | 553 (11.8)  | 190 (3.9)   | 448 (4.1)   | 839 (15.2)  | 534 (14.7)  | 1111 (40.3) | <0.001 |
| 10-12                  | 2791 (59.8) | 2885 (59.0) | 6995 (64.6) | 3075 (55.8) | 1748 (48.2) | 954 (34.6)  |        |
| ≥13                    | 1327 (28.4) | 1818 (37.2) | 3389 (31.3) | 1598 (29.0) | 1342 (37.0) | 692 (25.1)  |        |
| Missing                | 3           | 2           | 17          | 7           | 2           | 1           |        |
| <b>Body Mass Index</b> |             |             |             |             |             |             |        |
| ≤18.5                  | 2 (0.0)     | 2 (0.0)     | 3 (0.0)     | 4 (0.1)     | 4 (0.1)     | 1 (0.1)     | <0.001 |
| 18.5-24.9              | 514 (12.3)  | 393 (8.1)   | 533 (4.9)   | 978 (17.9)  | 766 (21.3)  | 344 (18.6)  |        |
| 25-29.9                | 2400 (57.5) | 2811 (58.0) | 2325 (21.6) | 2597 (47.4) | 1711 (47.5) | 980 (53.0)  |        |
| ≥30                    | 1256 (30.1) | 1638 (33.8) | 7915 (73.5) | 1898 (34.7) | 1118 (31.1) | 523 (28.3)  |        |
| Missing                | 502         | 51          | 73          | 42          | 27          | 910         |        |

p-value from chi-square test is used to test the difference between hospitals

Table 2 describes the antenatal obstetric characteristics of all births. About 25% of women were primiparous. Furthermore, women in Hospitals 4 and 5 had significantly more induction of labour than other hospitals (table 2). There were significant differences in hypertensive disorders between hospitals ranging from 0.9% in Hospital 6 to 4.4% in Hospital 3. The numbers of antenatal visits varied between hospitals. The women in Hospitals 1, 2 and 3 in Gaza had around 5 antenatal visits (SD 2.0; range 0–24) compared to nine (SD 2.9; range 0–29) in Hospitals 4, 5 and 6 in the West Bank (table 2). Less than 1% of women in all hospitals had undergone in vitro fertilization treatment.

Table 2: Antenatal obstetric characteristics of the study population (N=32 321)

|                                              | Hospital 1<br>(N=4674)<br>N (%) | Hospital 2<br>(N=4895)<br>N (%) | Hospital 3<br>(N=10 849)<br>N (%) | Hospital 4<br>(N=5519)<br>N (%) | Hospital 5<br>(N=3626)<br>N (%) | Hospital 6<br>(N=2758)<br>N (%) | p value   |
|----------------------------------------------|---------------------------------|---------------------------------|-----------------------------------|---------------------------------|---------------------------------|---------------------------------|-----------|
|                                              | Gaza                            |                                 |                                   | West Bank                       |                                 |                                 |           |
| <b>Parity</b>                                |                                 |                                 |                                   |                                 |                                 |                                 |           |
| Primiparous                                  | 1072 (22.9)                     | 1223 (25.0)                     | 2846 (26.2)                       | 1217 (22.1)                     | 1002 (27.6)                     | 749 (27.2)                      | <0.001*   |
| Parous                                       | 3600 (77.1)                     | 3672 (75.0)                     | 8001 (73.8)                       | 4302 (77.9)                     | 2624 (72.4)                     | 2008 (72.8)                     |           |
| Missing                                      | 2                               | 0                               | 2                                 | 0                               | 0                               | 1                               |           |
| <b>Number of children alive among parous</b> | 2 (2)                           | 2 (3)                           | 1 (3)                             | 2 (3)                           | 1 (3)                           | 1 (3)                           | <0.001*** |

|                                              |             |             |               |             |             |             |          |
|----------------------------------------------|-------------|-------------|---------------|-------------|-------------|-------------|----------|
| <b>women, median (interquartile range)</b>   |             |             |               |             |             |             |          |
| <b>Previous caesarean among parous women</b> |             |             |               |             |             |             |          |
| 0                                            | 3419 (95.0) | 3393 (92.4) | 7161 (89.5)   | 3704 (86.1) | 2295 (87.5) | 1869 (93.1) | <0.001*  |
| 1                                            | 181 (5.0)   | 279 (7.6)   | 840 (10.5)    | 598 (13.9)  | 329 (12.5)  | 139 (6.9)   |          |
| <b>Number of antenatal visits, mean (SD)</b> | 5.12 (1.97) | 5.75 (1.98) | 5.53 (1.97)   | 9.06 (3.06) | 8.60 (2.16) | 9.64 (3.42) | <0.001** |
| <b>Number of antenatal visits</b>            |             |             |               |             |             |             |          |
| ≤3                                           | 947 (20.3)  | 181 (3.7)   | 1358 (12.5)   | 221 (4.0)   | 84 (2.3)    | 103 (3.7)   | <0.001*  |
| 4-7                                          | 3171 (67.9) | 3783 (77.4) | 7334 (67.7)   | 1068 (19.4) | 677 (18.7)  | 439 (16.0)  |          |
| ≥8                                           | 553 (11.8)  | 923 (18.9)  | 2146 (19.8)   | 4212 (76.6) | 2859 (79.0) | 2209 (67.1) |          |
| Missing                                      | 3           | 8           | 11            | 18          | 6           | 7           |          |
| <b>In vitro fertilization treatment</b>      |             |             |               |             |             |             |          |
| Yes                                          | 26 (0.6)    | 13 (0.3)    | 35 (0.3)      | 32 (0.6)    | 19 (0.5)    | 14 (0.5)    | <0.043*  |
| No                                           | 4476 (99.4) | 4809 (99.7) | 10 507 (99.7) | 5471 (99.4) | 3592 (99.5) | 2723 (99.5) |          |
| Missing                                      | 172         | 73          | 307           | 16          | 15          | 21          |          |
| <b>Hypertensive disorder</b>                 |             |             |               |             |             |             |          |
| Yes                                          | 155 (3.3)   | 147 (3.0)   | 473 (4.4)     | 158 (2.9)   | 68 (1.9)    | 26 (0.9)    | <0.001*  |
| No/unknown                                   | 4519 (96.7) | 4748 (97.0) | 10 376 (95.6) | 5361 (97.1) | 3558 (98.1) | 2732 (99.1) |          |
| <b>Induction of labour</b>                   |             |             |               |             |             |             |          |
| Yes                                          | 373 (8.0)   | 549 (11.2)  | 1424 (13.1)   | 1027 (18.6) | 601 (16.6)  | 324 (11.7)  | <0.001*  |
| No/Unknown                                   | 4301 (92.0) | 4346 (88.8) | 9425 (86.9)   | 4492 (81.4) | 3025 (83.4) | 2434 (88.3) |          |

SD= standard deviation.

\* p-value from chi-square test is used to test the difference between hospitals.

\*\* p-value from analysis of variance by ANOVA test is used to test the difference between hospitals.

\*\*\* p-value from analysis of variance by Kruskal-Wallis test

Significant differences in the prevalence of emergency caesarean section between hospitals were observed, for primiparous as well as parous women. Among primiparous women, the prevalence was 12.4%, ranging from 5.8% in Hospital 1 to 22.6% in Hospital 6. Likewise for

parous women, the prevalence was 7.9%, ranging from 4.8% in Hospital 1 to 13.1% in Hospital 6 (table 3).

Table 3: Prevalence of emergency caesarean section in the study hospitals

|                                    | Hospital 1<br>(N=4674) | Hospital 2<br>(N=4895) | Hospital 3<br>(N=10 849) | Hospital 4<br>(N=5519) | Hospital 5<br>(N=3626) | Hospital 6<br>(N=2758) | p<br>value*** |
|------------------------------------|------------------------|------------------------|--------------------------|------------------------|------------------------|------------------------|---------------|
|                                    | Gaza                   |                        |                          | West Bank              |                        |                        |               |
| <b>Emergency caesarean section</b> | % (N)*                 | % (N)*                 | % (N)*                   | % (N)*                 | % (N)*                 | % (N)*                 |               |
| All women                          | 5.0<br>(235/4674)      | 8.0<br>(391/4895)      | 9.4<br>(1015/10 849)     | 7.4<br>(409/5519)      | 12.4<br>(450/3626)     | 15.7<br>(432/2758)     | <0.001        |
| <b>Parity</b>                      | % (N)**                | % (N)**                | % (N)**                  | % (N)**                | % (N)**                | % (N)**                |               |
| Primiparous women                  | 5.8<br>(62/1072)       | 10.9<br>(133/1223)     | 12.8<br>(365/2846)       | 10.7<br>(130/1217)     | 15.0<br>(150/1002)     | 22.6<br>(169/749)      | <0.001        |
| Parous women                       | 4.8<br>(173/3600)      | 7.0<br>(258/3672)      | 8.1<br>(650/8001)        | 6.5<br>(279/4302)      | 11.4<br>(300/2624)     | 13.1<br>(263/2008)     | <0.001        |

\*N=number of emergency caesarean section/ total number of deliveries in the hospital.

\*\*N=number of emergency caesarean section/ total number of deliveries among women group in the hospital.

\*\*\*p-value from chi-square test.

Among primiparous women, the odds ratio (ORs) for emergency caesarean section differed by hospital (table 4). Hospital 1 had the lowest prevalence of emergency caesarean section, and was thus considered the reference hospital. The largest difference was found for Hospital 6, crude OR 4.75 (95% CI 3.49 to 6.46). When adjusting for potential confounders, the ORs for different hospitals were reduced, but still statistically significant (table 4, model 3). When checking for interaction, the body mass index modified the effect of hospitals. In Hospital 3, the OR decreased with increasing body mass index (body mass index  $\geq 30$ : OR 0.31, 95% CI 0.11 to 0.90), whereas the other hospitals had increased ORs with increasing body mass index.

Table 4: Logistic regression analysis of the association between sociodemographic and antenatal obstetric characteristics and the risk of emergency caesarean section among primiparous in the participating hospitals (N=8109)

|                                           | <b>Crude OR</b><br>(95% CI) | <b>Model 1</b><br>OR (95% CI) | <b>Model 2</b><br>OR (95% CI) | <b>Model 3</b><br>OR (95% CI) |
|-------------------------------------------|-----------------------------|-------------------------------|-------------------------------|-------------------------------|
| <b>Hospitals</b>                          |                             |                               |                               |                               |
| Hospital 1                                | REF                         | REF                           | REF                           | REF                           |
| Hospital 2                                | 1.99 (1.45 to 2.72)         | 1.90 (1.34 to 2.70)           | 1.99 (1.44 to 2.75)           | 1.87 (1.30 to 2.68)           |
| Hospital 3                                | 2.40 (1.81 to 3.17)         | 2.40 (1.73 to 3.33)           | 2.43 (1.82 to 3.24)           | 2.47 (1.77 to 3.46)           |
| Hospital 4                                | 1.95 (1.42 to 2.67)         | 2.33 (1.64 to 3.31)           | 1.58 (1.11 to 2.25)           | 1.84 (1.24 to 2.73)           |
| Hospital 5                                | 2.87 (2.11 to 3.91)         | 2.99 (2.12 to 4.22)           | 2.49 (1.77 to 3.50)           | 2.53 (1.74 to 3.70)           |
| Hospital 6                                | 4.75 (3.49 to 6.46)         | 4.28 (2.94 to 6.22)           | 4.11 (2.87 to 5.90)           | 3.54 (2.29 to 5.47)           |
| <b>Maternal age (years)</b>               | 1.12 (1.10 to 1.13)         | 1.12 (1.10 to 1.14)           |                               | 1.12 (1.10 to 1.14)           |
| <b>Place of residence</b>                 |                             |                               |                               |                               |
| Urban/rural                               | REF                         | REF                           |                               | REF                           |
| Camp                                      | 1.22 (1.04 to 1.44)         | 1.32 (1.08 to 1.61)           |                               | 1.24 (1.01 to 1.53)           |
| <b>Education (years)</b>                  |                             |                               |                               |                               |
| ≤9                                        | REF                         | N/A ****                      |                               | N/A ****                      |
| 10 to 12                                  | 0.50 (0.41 to 0.62)         |                               |                               |                               |
| ≥13                                       | 0.58 (0.47 to 0.72)         |                               |                               |                               |
| <b>Body Mass Index (kg/m<sup>2</sup>)</b> |                             |                               |                               |                               |
| ≤24.9                                     | REF                         | REF                           |                               | REF                           |
| 25 to 29.9                                | 1.15 (0.91 to 1.46)         | 1.17 (0.92 to 1.50)           |                               | 1.12 (0.88 to 1.44)           |
| ≥30                                       | 1.50 (1.20 to 1.89)         | 1.41 (1.10 to 1.81)           |                               | 1.30 (1.01 to 1.68)           |
| <b>Antenatal visits (n)</b>               | 1.07 (1.05 to 1.10)         |                               | 1.04 (1.01 to 1.07)           | 1.04 (1.01 to 1.07)           |
| <b>In vitro fertilization treatment</b>   |                             |                               |                               |                               |
| No                                        | REF                         |                               | REF                           | REF                           |
| Yes                                       | 5.93 (3.61 to 9.75)         |                               | 6.62 (3.97 to 10.05)          | 4.64 (2.66 to 8.08)           |
| <b>Hypertensive disorder</b>              |                             |                               |                               |                               |
| No/unknown                                | REF                         |                               | REF                           | REF                           |
| Yes                                       | 3.62 (2.75 to 4.77)         |                               | 3.95 (2.96 to 5.28)           | 3.56 (2.61 to 4.86)           |
| <b>Induction of labour</b>                |                             |                               |                               |                               |
| No/unknown                                | REF                         |                               | REF                           | REF                           |
| Yes                                       | 1.49 (1.27 to 1.75)         |                               | 1.33 (1.12 to 1.57)           | 1.32 (1.10 to 1.57)           |

\*Adjusted for sociodemographic characteristics (maternal age, place of residence, education and body mass index).

\*\*Adjusted for obstetric characteristics (antenatal visits, in vitro fertilization treatment, hypertensive disorder and induction of labour).

\*\*\* Adjusted for sociodemographic characteristics (age, place of residence, education, body mass index) and obstetric characteristics (antenatal visits, in vitro fertilization treatment, hypertensive disorder and induction of labour).

\*\*\*\*N/A= not applicable due to multicollinearity.

A similar trend was found among parous women, but the differences between hospitals were less pronounced compared to primiparous women (table 5). After including sociodemographic and antenatal obstetric confounders in the model, the difference between the hospitals was less clear but still statistically significant for all hospitals, except Hospital 4. The strongest risk factor for emergency caesarean section was previous caesarean section (OR 6.26, 95% CI 5.57 to 7.05).

Table 5: Logistic regression analysis of the association between sociodemographic and obstetric characteristics and the risk of emergency caesarean section among parous in the participating hospitals (N=24 210)

|                  | Crude OR<br>(95% CI) | Model 1*<br>OR (95% CI) | Model 2**<br>OR (95% CI) | Model 3***<br>OR (95% CI) |
|------------------|----------------------|-------------------------|--------------------------|---------------------------|
| <b>Hospitals</b> |                      |                         |                          |                           |
| Hospital 1       | REF                  | REF                     | REF                      | REF                       |
| Hospital 2       | 1.50 (1.23 to 1.83)  | 1.48 (1.19 to 1.84)     | 1.38 (1.12 to 1.70)      | 1.30 (1.04 to 1.63)       |
| Hospital 3       | 1.75 (1.47 to 2.08)  | 1.80 (1.48 to 2.20)     | 1.50 (1.25 to 1.80)      | 1.53 (1.25 to 1.89)       |
| Hospital 4       | 1.37 (1.13 to 1.67)  | 1.39 (1.12 to 1.72)     | 0.87 (0.70 to 1.09)      | 0.81 (0.64 to 1.04)       |
| Hospital 5       | 2.56 (2.11 to 3.11)  | 2.61 (2.11 to 3.23)     | 1.89 (1.52 to 2.34)      | 1.70 (1.34 to 2.15)       |
| Hospital 6       | 2.99 (2.44 to 3.65)  | 2.28 (1.78 to 2.93)     | 2.66 (2.12 to 3.34)      | 1.74 (1.32 to 2.31)       |

|                                           |                     |                     |                     |                     |
|-------------------------------------------|---------------------|---------------------|---------------------|---------------------|
| <b>Maternal age (years)</b>               | 1.05 (1.04 to 1.06) | 1.05 (1.04 to 1.06) |                     | 1.07 (1.05 to 1.08) |
| <b>Place of residence</b>                 |                     |                     |                     |                     |
| Urban/rural                               | REF                 | REF                 |                     | REF                 |
| Camp                                      | 1.14 (1.01 to 1.29) | 1.24 (1.07 to 1.43) |                     | 1.19 (1.02 to 1.39) |
| <b>Education (years)</b>                  |                     |                     |                     |                     |
| ≤9                                        | REF                 | REF                 |                     | REF                 |
| 10 to 12                                  | 0.60 (0.53 to 0.68) | 0.86 (0.74 to 1.01) |                     | 0.79 (0.67 to 0.93) |
| ≥13                                       | 0.52 (0.45 to 0.60) | 0.73 (0.61 to 0.86) |                     | 0.62 (0.52 to 0.75) |
| <b>Body Mass Index (kg/m<sup>2</sup>)</b> |                     |                     |                     |                     |
| ≤24.9                                     | REF                 | REF                 |                     | REF                 |
| 25-29.9                                   | 1.25 (1.04 to 1.49) | 1.27 (1.05 to 1.53) |                     | 1.30 (1.07 to 1.58) |
| ≥30                                       | 1.38 (1.15 to 1.65) | 1.23 (1.02 to 1.49) |                     | 1.18 (0.97 to 1.43) |
| <b>Children alive (n)</b>                 | 1.02 (1 to 1.05)    |                     | 1.03 (1 to 1.05)    | 0.90 (0.87 to 0.94) |
| <b>Previous caesarean section</b>         |                     |                     |                     |                     |
| 0                                         | REF                 |                     | REF                 | REF                 |
| 1                                         | 6.65 (5.98 to 7.39) |                     | 6.85 (6.12 to 7.65) | 6.26 (5.57 to 7.05) |
| <b>Antenatal visits (n)</b>               | 1.07 (1.05 to 1.09) |                     | 1.05 (1.03 to 1.07) | 1.06 (1.04 to 1.08) |
| <b>In vitro fertilization treatment</b>   |                     |                     |                     |                     |
| No                                        | REF                 |                     | REF                 | REF                 |
| Yes                                       | 2.69 (1.50 to 4.81) |                     | 2.13 (1.09 to 4.16) | 1.98 (0.98 to 3.99) |
| <b>Hypertensive disorder</b>              |                     |                     |                     |                     |
| No/unknown                                | REF                 |                     | REF                 | REF                 |
| Yes                                       | 2.98 (2.48 to 3.57) |                     | 3.18 (2.60 to 3.89) | 3.02 (2.45 to 3.73) |
| <b>Induction of labour</b>                |                     |                     |                     |                     |
| No/unknown                                | REF                 |                     | REF                 | REF                 |
| Yes                                       | 0.91 (0.78 to 1.05) |                     | 0.97 (0.83 to 1.14) | 0.95 (0.80 to 1.12) |

\*Adjusted for sociodemographic characteristics (maternal age, place of residence, education and body mass index).

\*\*Adjusted for obstetric characteristics (children alive, previous caesarean section, antenatal visits, in vitro fertilization treatment, hypertensive disorder and induction of labour).

\*\*\*Adjusted for sociodemographic characteristics (age, place of residence, education, body mass index) and obstetric characteristics characteristics (children alive, previous caesarean

1  
2  
3 section, antenatal visits, in vitro fertilization treatment,  
4 hypertensive disorder and induction of labour).

5  
6 \*\*\*\*N/A= not applicable due to multicollinearity.  
7  
8  
9

10  
11 Interactions by hospital were observed for previous caesarean section and for hypertensive  
12 disorder among parous women. The OR of emergency caesarean section was 15-17 for  
13 women with previous caesarean section compared to no previous caesarean section in  
14 Hospitals 2 and 6, whereas the other hospitals had a corresponding OR of 4-8. Furthermore,  
15 an OR of 10 was observed for women with hypertensive disorder compared to those without  
16 hypertensive disorder in Hospital 1, whereas the other hospitals had a corresponding OR of 2-  
17  
18  
19  
20  
21  
22  
23  
24  
25 4 of emergency caesarean section.

## 26 **Discussion**

27  
28 There were notable variations between study hospitals in rate and risk for emergency caesarean  
29 section among singleton pregnancies for primiparous and parous women. Compared to the  
30 hospital with the lowest prevalence for emergency caesarean section, the crude odds ratios  
31 were increased in all other hospitals by up to almost fivefold for the primiparous and threefold  
32 for parous women. The effect of sociodemographic and maternal antenatal obstetrical  
33 characteristics in risk for emergency caesarean section is in line with previous research,  
34 confirming previous caesarean section, hypertension disorder and in vitro fertilization  
35 treatment as the strongest risk factors for emergency caesarean section.<sup>16,17</sup> So far this is the  
36 largest birth cohort study in Palestine, including 32 321 women, and the first to focus on  
37 emergency caesarean section.  
38  
39  
40  
41  
42  
43  
44  
45  
46  
47  
48

49 Caesarean section may be life-saving for both the mother and the newborn, but overuse of  
50 caesarean section does not improve maternal or perinatal health.<sup>4,18</sup> Immediate surgical  
51 complications and adverse effects in future pregnancies, such as increased risk of intrauterine  
52 fetal demise, preterm delivery, uterine abruption and abnormal placentation (praevia, accreta,  
53  
54  
55  
56  
57  
58  
59  
60



1  
2  
3 increta), are reasons why caesarean section should be performed when clinically indicated  
4 only.<sup>4,19</sup> Increasing numbers of repeat caesarean sections increases the risk of severe  
5  
6 complications on the individual level. Knowing that a previous caesarean section increases the  
7  
8 risk for repeat caesarean section in the next pregnancy,<sup>20</sup> makes the management of the  
9  
10 delivery of a primiparous woman a true challenge in obstetrics.  
11

12  
13 Large differences in caesarean section rates between hospitals may reflect varying skills and  
14  
15 working methods.<sup>21</sup> There are few previous studies on differences in caesarean section rates  
16  
17 and risks between hospitals within the same country. A large study from England compared  
18  
19 146 National Health Service (NHS) trusts, including 620 604 singleton births.<sup>6</sup> The study  
20  
21 showed that unadjusted rates of caesarean sections among the NHS trusts differed notably,  
22  
23 ranging from 13.6% to 31.9%. After adjustment for maternal characteristics, the caesarean  
24  
25 section rate still varied from 14.9% to 32.1%. The main differences in caesarean section rates  
26  
27 between trusts appeared with emergency caesarean section; ranging from 10.7% to 18.9%,  
28  
29 compared to elective caesarean section; ranging from 7.8% to 11.2%.<sup>6</sup> The authors suggested  
30  
31 that the remaining differences in emergency caesarean section across NHS trusts could be due  
32  
33 to lack of precise criteria for indications or differences in management practice, which could  
34  
35 also be the case in this study.  
36  
37

38  
39 Another study conducted in Lebanon included 3846 women with singleton, cephalic, viable  
40  
41 full term pregnancy.<sup>21</sup> The study examined the association between caesarean section and  
42  
43 maternal characteristics, pregnancy outcome and characteristics of maternity units. They found  
44  
45 large variations between two geographical zones of Lebanon. The authors concluded that the  
46  
47 variations between zones were due to variations in patients' access to medical care or  
48  
49 variations in clinical practice.<sup>21</sup> These findings were in line with the findings of this study, but  
50  
51 this study focused on the variations between hospitals after adjustment for risk factors.  
52  
53  
54  
55  
56  
57  
58  
59  
60

1  
2  
3 All hospitals in our study have a neonatal intensive care unit and five of six also have a  
4  
5 maternal intensive care unit. Hospital 1 is not a referral hospital, and does not have a maternal  
6  
7 intensive care unit for the delivering women. Thus, the lowest emergency caesarean section  
8  
9 rate in this hospital may reflect a population with lower risk for complications. All six  
10  
11 hospitals were governmental and five of the six were teaching hospitals. The non-teaching one,  
12  
13 Hospital 2, had no educational program for the non-specialist doctors, which may lead to less  
14  
15 qualified maternal care. However, this did not increase the risk for emergency caesarean  
16  
17 section in this hospital.  
18

19  
20 A previous study from Norway showed that decision making for caesarean section delivery by  
21  
22 consultants lowered the caesarean section rates.<sup>22</sup> On call arrangements for each hospital were  
23  
24 not explored in this study and the decision making process for emergency caesarean section  
25  
26 may vary across the study hospitals due to varying involvement of a specialist in obstetrics  
27  
28 during non-office hours. In some of the study hospitals, a specialist in obstetrics is present in  
29  
30 the hospital all the time, whereas in others the specialists are available for consultations only,  
31  
32 and not present in the hospital during the evening and night. Differences in number of  
33  
34 consultations, residents and midwives may also affect the decision-making process. However,  
35  
36 numbers of consultant, residents and midwives, reported in the previous study in these  
37  
38 hospitals, did not have a consistent effect on emergency caesarean section rates.<sup>13</sup>  
39  
40

41  
42 In Palestine, there are common national guidelines for obstetrics,<sup>23</sup> but the practical training of  
43  
44 midwives and doctors may vary between hospitals. Given the large differences in risk for  
45  
46 emergency caesarean section, these guidelines may be applied differently across hospitals due  
47  
48 to differences in skills of medical staff causing different use of caesarean section instead of  
49  
50 operative vaginal delivery.<sup>24</sup> A study from the UK, including 216 maternity units, examined  
51  
52 the variation in caesarean section rates between delivery units. The study concluded that  
53  
54 organizational factors and staffing levels, women's preferences for delivery mode and the  
55  
56  
57  
58  
59  
60

1  
2  
3 clinician's attitudes may explain the variations.<sup>25</sup> Medical doctors in Palestine are neither  
4 insured by their employer nor by the Palestinian Ministry of Health, and may therefore be sued  
5 privately if a pregnancy complication occurs. This may also affect their use of emergency  
6 caesarean section especially when vaginal births after caesarean section were indicated. It is  
7 well known that the decision makers are affected by their own fear, cultural factors, legal  
8 liability and medical evidence.<sup>26</sup> Also the fear of perceived risks for complaints and  
9 malpractice litigation is associated with requested caesarean section delivery.<sup>27</sup> In Sweden,  
10 caesarean section deliveries for non-medical reasons are 18% of all caesarean sections, and this  
11 rate increased by 80% from 1990 to 2001.<sup>28</sup> Physicians' attitudes are known to influence the  
12 parents' choice.<sup>26</sup> However, in governmental Palestinian hospitals maternal request without  
13 medical reason is not a justified indication for caesarean section.

#### 24 25 26 *Strengths and limitations of the study*

##### 27 28 *Strengths*

29  
30 The strengths of this study are the population-based approach and the prospective design. The  
31 data were collected for research purposes in a prospective manner. All women aiming to give  
32 birth vaginally in the six study hospitals were included, reducing the risk for selection bias. A  
33 large number of deliveries were included and six different hospitals were compared in Gaza  
34 and West Bank for the first time.

##### 35 36 37 *Limitations*

38  
39 The main limitation of this study was the missing data on some deliveries from March 2015  
40 until December 2015. In five of the six study hospitals less than 4% of data were missing, but  
41 in one hospital, Hospital 6, data was missing for 28% of its deliveries.<sup>13</sup> The missing data were  
42 expected to be random, not influencing the exposure-outcome associations studied. Data on  
43 diabetes before and during pregnancy, known to be associated with increased risk of  
44 emergency caesarean section,<sup>29</sup> were not registered accurately and could therefore not be used  
45  
46  
47  
48  
49  
50  
51  
52  
53  
54  
55  
56  
57  
58  
59  
60

1  
2  
3 for analyses. Moreover, exclusion for multiple pregnancies may have affected the rate of  
4  
5 emergency caesarean sections. Since this is a methodological choice, we consider exclusion of  
6  
7 multiple pregnancies to be a minor limitation of the study. Additionally, the effect of pre-  
8  
9 pregnancy body mass index increased the risk for emergency caesarean section for primiparous  
10  
11 women in hospitals except in Hospital 3, which could be due to inaccurate registration of  
12  
13 maternal weight. Furthermore, inaccuracies could have affected the categorisation of place of  
14  
15 residence. One further limitation was a lack of data about hospital specification including  
16  
17 available resources or staff shift patterns. However as all study hospitals are governmental  
18  
19 hospitals, it is justified to assume that no great differences exist between the hospitals.  
20  
21

## 22 **Conclusion**

23  
24 Major differences in rates and risks for emergency caesarean section were observed between  
25  
26 the six governmental Palestinian hospitals. These could not be explained by differences in the  
27  
28 studied sociodemographic or antenatal obstetrical characteristics. These findings may imply  
29  
30 that factors related to doctors and their working environments are important in the decision to  
31  
32 deliver by emergency caesarean section.  
33  
34

## 35 **Acknowledgements**

36  
37 The Author would like to extend the best thanks and gratitude to the Norwegian Research  
38  
39 Council for funding this study. We do thank the Palestinian Ministry of Health for supporting  
40  
41 the study. We also appreciate the effort and time spent by research teams for data collection.  
42  
43

## 44 **Contribution to authorship:**

45  
46 M. Zimmo: Charge of data collection, participated in staff training on data registration and  
47  
48 entry, statistical analysis for the data set and drafted the manuscript.  
49

50  
51 K. Laine: Study design, protocol and research tool development, participated in staff training  
52  
53 on data registration and entry and drafted the manuscript.  
54  
55  
56  
57  
58  
59  
60

1  
2  
3 S. Hassan: Study design, collaborated in the preparation of the protocol and research tool  
4 development, data collection, participated in staff training on data registration and entry and  
5 commented on the manuscript.  
6  
7

8  
9 E. Fosse: Study design, protocol development and commented on the manuscript.  
10

11 M. Lieng: commented on the manuscript.  
12

13 K. Zimmo and H. Ali-Masri: Data collection, participated in staff training on data registration  
14 and entry and commented on the manuscript.  
15

16 M. Anti: commented on the manuscript.  
17

18 B. Bottcher: revise the medical English language and commented on the manuscript.  
19

20 R. Sørum Falk: Statistical analysis for the data set and commented on the manuscript.  
21

22 A. Vikanes: Study design, protocol and research tool development and participated in staff  
23 training on data registration and entry and commented on the manuscript.  
24  
25  
26

27 All authors approved the final version.  
28

29  
30 **Funding:** This work was supported by the Norwegian Research Council through Oslo  
31 University Hospital (234452/14). The funding source had no role in the study design, data  
32 collection, data analysis, data interpretation, or writing of the manuscript. All authors had full  
33 access to all the data in the study and can take responsibility for the integrity and accuracy of  
34 the data analysis and they had final responsibility for the decision to submit for publication.  
35  
36  
37  
38

39 **Competing interest:** All authors have completed the ICMJE uniform disclosure form and  
40 have no conflict of interest to declare.  
41  
42  
43

44 **Ethical approval:** This study was approved by the Norwegian Data Inspectorate (17/00082-  
45 2/GRA) and the Regional Committee for Medical and Health Research Ethics in South-Eastern  
46 Norway and was considered as health quality research (REK 2014/1727). Oslo University  
47 Hospital signed an agreement with the Palestinian Ministry of Health which approved  
48  
49  
50  
51  
52  
53  
54  
55  
56  
57  
58  
59  
60

1  
2  
3 conducting the study within their facilities. The project was done in accordance with common  
4  
5 rules for health care services in Palestine and Norway regarding confidentiality and privacy.  
6

7 **Data sharing statement:** No additional data are available.  
8  
9  
10  
11  
12  
13  
14  
15  
16  
17  
18  
19  
20  
21  
22  
23  
24  
25  
26  
27  
28  
29  
30  
31  
32  
33  
34  
35  
36  
37  
38  
39  
40  
41  
42  
43  
44  
45  
46  
47  
48  
49  
50  
51  
52  
53  
54  
55  
56  
57  
58  
59  
60

For peer review only

## References

1. Abalos E, Addo V, Brocklehurst P, et al. Caesarean section surgical techniques: 3 year follow-up of the CORONIS fractional, factorial, unmasked, randomised controlled trial. *Lancet* (London, England) 2016; **388**: 62-72.
2. Betrán AP, Ye J, Moller A-B, et al. The increasing trend in caesarean section rates: global, regional and national estimates: 1990-2014. *PloS one* 2016; **11**: e0148343.
3. Lumbiganon P, Laopaiboon M, Gülmezoglu AM, et al. Method of delivery and pregnancy outcomes in Asia: the WHO global survey on maternal and perinatal health 2007–08. *Lancet* 2010; **375**: 490-9.
4. Shorten A. Maternal and neonatal effects of caesarean section. *BMJ* 2007; **335**: 1003-4.
5. Kwee A, Elferink-Stinkens P, Reuwer P, et al. Trends in obstetric interventions in the Dutch obstetrical care system in the period 1993–2002. *European Journal of Obstetrics & Gynecology and Reproductive Biology* 2007; **132**: 70-5.
6. Bragg F, Cromwell DA, Edozien LC, et al. Variation in rates of caesarean section among English NHS trusts after accounting for maternal and clinical risk: cross sectional study. *BMJ* 2010; **341**: c5065.
7. Librero J, Peiró S, Calderón SM. Inter-hospital variations in caesarean sections. A risk adjusted comparison in the Valencia public hospitals. *Journal of epidemiology and community health* 2000; **54**: 631-6.
8. Habiba M, Kaminski M, Da Fre M, et al. Caesarean section on request: a comparison of obstetricians' attitudes in eight European countries. *BJOG: An International Journal of Obstetrics & Gynaecology* 2006; **113**: 647-56.

- 1  
2  
3 9. Abdul-Rahim H, Abu-Rmeileh N, Wick L. Cesarean section deliveries in the occupied  
4  
5 Palestinian territory (oPt): An analysis of the 2006 Palestinian Family Health Survey. *Health*  
6  
7 *policy December 2009*; **93**: 151-6.
- 8  
9 10. Mikki N, Abu Rmeileh N, Wick L, et al. Caesarean delivery rates, determinants and  
10  
11 indications in Makassed Hospital, Jerusalem 1993 and 2002. *Eastern Mediterranean Health*  
12  
13 *Journal July-August, 2009*; **15**: 868.
- 14  
15 11. P MoH. Health Status, Palestine 2015. In Ramallah, State of Palestine: Ministry of  
16  
17 Health: July 2016.
- 18  
19 12. Van den Berg MM, Madi HH, Khader A, et al. Increasing neonatal mortality among  
20  
21 Palestine refugees in the Gaza Strip. *PloS one 2015*; **10**: e0135092.
- 22  
23 13. Hassan S, Vikanes A, Laine K, et al. Building a research registry for studying birth  
24  
25 complications and outcomes in six Palestinian governmental hospitals. *BMC Pregnancy and*  
26  
27 *Childbirth 2017*; **17**: 1296-6.
- 28  
29 14. Jensen DM, Damm P, Sørensen B, et al. Pregnancy outcome and prepregnancy body  
30  
31 mass index in 2459 glucose-tolerant Danish women. *American journal of obstetrics and*  
32  
33 *gynecology 2003*; **189**: 239-44.
- 34  
35 15. Lucas D, Yentis S, Kinsella S, et al. Urgency of caesarean section: a new  
36  
37 classification. *Journal of the Royal Society of Medicine 2000*; **93**: 346-50.
- 38  
39 16. Leone T, Padmadas SS, Matthews Z. Community factors affecting rising caesarean  
40  
41 section rates in developing countries: an analysis of six countries. *Social science & medicine*  
42  
43 *2008*; **67**: 1236-46.
- 44  
45 17. Pandey S, Shetty A, Hamilton M, et al. Obstetric and perinatal outcomes in singleton  
46  
47 pregnancies resulting from IVF/ICSI: a systematic review and meta-analysis. *Human*  
48  
49 *reproduction update 2012*; **18**: 485-503
- 50  
51  
52  
53  
54  
55  
56  
57  
58  
59  
60



- 1  
2  
3 18. Deneux-Tharaux C, Carmona E, Bouvier-Colle M-H, et al. Postpartum maternal  
4 mortality and cesarean delivery. *Obstetrics & Gynecology* 2006; **108**(Part 1): 541-8.
- 5  
6  
7 19. Field A, Haloob R. Complications of caesarean section. *The Obstetrician &*  
8  
9  
10 *Gynaecologist* 2016; **18**: 265-72.
- 11  
12 20. Lockwood C. Editorial Why the CD rate is on the rise (Part 1). *CONTEMPORARY OB*  
13  
14 *GYN* 2004; **49**: 8.
- 15  
16 21. Carayol M, Zein A, Ghosn N, Du Mazaubrun C, Breart G. Determinants of caesarean  
17  
18 section in Lebanon: geographical differences. *Paediatric and perinatal epidemiology* 2008;  
19  
20 22(2): 136-44.
- 21  
22 22. Nilsen ST, Bergsjö P, Lökling A, et al. A comparison of cesarean section frequencies  
23  
24 in two Norwegian hospitals. *Acta obstetrica et gynecologica Scandinavica* 1983; **62**: 555-61.
- 25  
26 23. Kurd A, Belbisi A, Jaber S et al. Palestinian guidelines and protocols for Obstetricians,  
27  
28 general practitioners and midwives. Preoperative preparation. Ramallah, State of Palestine:  
29  
30 Palestinian National Authority, MOH November 2014: 191-3.
- 31  
32 24. Sachs BP, Kobelin C, Castro MA, et al. The risks of lowering the cesarean-delivery  
33  
34 rate. *The New England Journal of Medicine* 1999; **340**: 54-7.
- 35  
36  
37 25. Paranjothy S, Frost C, Thomas J. How much variation in CS rates can be explained by  
38  
39 case mix differences? *BJOG: An International Journal of Obstetrics & Gynaecology* 2005;  
40  
41 **112**: 658-66.
- 42  
43 26. Belizán JM, Showalter E, Castro A, et al. Rates and implications of caesarean sections  
44  
45 in Latin America: ecological study  
46  
47 Commentary: all women should have a choice  
48  
49 Commentary: increase in caesarean sections may reflect medical control not women's choice  
50  
51 Commentary: "health has become secondary to a sexually attractive body". *BMJ*  
52  
53 1999; **319**: 1397-402.
- 54  
55  
56  
57  
58  
59  
60

- 1  
2  
3 27. Fuglenes D, Øian P, Kristiansen IS. Obstetricians' choice of cesarean delivery in  
4 ambiguous cases: is it influenced by risk attitude or fear of complaints and litigation?  
5 *American journal of obstetrics and gynecology* 2009; **200**: 48. e1-. e8.  
6  
7  
8  
9 28. Elvander C, Dahlberg J, Andersson G, et al. Mode of delivery and the probability of  
10 subsequent childbearing: a population-based register study. *BJOG* 2015; **122**:1593-600.  
11  
12  
13 29. Ehrenberg HM, Mercer BM, Catalano PM. The influence of obesity and diabetes on  
14 the prevalence of macrosomia. *American journal of obstetrics and gynecology* 2004; **191**:  
15  
16  
17  
18  
19  
20  
21  
22  
23  
24  
25  
26  
27  
28  
29  
30  
31  
32  
33  
34  
35  
36  
37  
38  
39  
40  
41  
42  
43  
44  
45  
46  
47  
48  
49  
50  
51  
52  
53  
54  
55  
56  
57  
58  
59  
60

Figure 1: Flow chart of the selected study population, multicenter study from Palestine

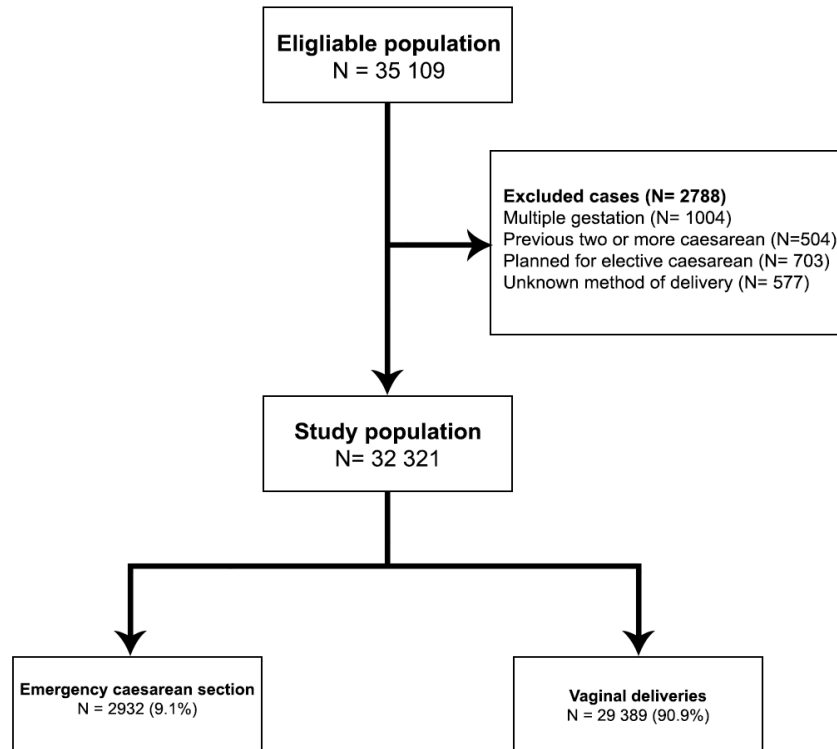

view only

**STROBE 2007 (v4) Statement—Checklist of items that should be included in reports of *cohort studies***

| Section/Topic            | Item # | Recommendation                                                                                                                                                                       | Reported on page #                                                |
|--------------------------|--------|--------------------------------------------------------------------------------------------------------------------------------------------------------------------------------------|-------------------------------------------------------------------|
| Title and abstract       | 1      | (a) Indicate the study's design with a commonly used term in the title or the abstract                                                                                               | Within the title page 1 and method section of the abstract page 2 |
|                          |        | (b) Provide in the abstract an informative and balanced summary of what was done and what was found                                                                                  | results section of abstract page 2                                |
| <b>Introduction</b>      |        |                                                                                                                                                                                      |                                                                   |
| Background/rationale     | 2      | Explain the scientific background and rationale for the investigation being reported                                                                                                 | page 4                                                            |
| Objectives               | 3      | State specific objectives, including any prespecified hypotheses                                                                                                                     | page 4-5                                                          |
| <b>Methods</b>           |        |                                                                                                                                                                                      |                                                                   |
| Study design             | 4      | Present key elements of study design early in the paper                                                                                                                              | Abstract page 2 and Methods page 5                                |
| Setting                  | 5      | Describe the setting, locations, and relevant dates, including periods of recruitment, exposure, follow-up, and data collection                                                      | pages 5 and 6                                                     |
| Participants             | 6      | (a) Give the eligibility criteria, and the sources and methods of selection of participants. Describe methods of follow-up                                                           | pages 5                                                           |
|                          |        | (b) For matched studies, give matching criteria and number of exposed and unexposed                                                                                                  |                                                                   |
| Variables                | 7      | Clearly define all outcomes, exposures, predictors, potential confounders, and effect modifiers. Give diagnostic criteria, if applicable                                             | pages 6-7                                                         |
| Data sources/measurement | 8*     | For each variable of interest, give sources of data and details of methods of assessment (measurement). Describe comparability of assessment methods if there is more than one group | pages 5                                                           |
| Bias                     | 9      | Describe any efforts to address potential sources of bias                                                                                                                            | N/A                                                               |
| Study size               | 10     | Explain how the study size was arrived at                                                                                                                                            |                                                                   |
| Quantitative variables   | 11     | Explain how quantitative variables were handled in the analyses. If applicable, describe which groupings were chosen and why                                                         | Pages 6                                                           |
| Statistical methods      | 12     | (a) Describe all statistical methods, including those used to control for confounding                                                                                                | Pages 6                                                           |

|                          |     |                                                                                                                                                                                                              |                          |
|--------------------------|-----|--------------------------------------------------------------------------------------------------------------------------------------------------------------------------------------------------------------|--------------------------|
|                          |     | (b) Describe any methods used to examine subgroups and interactions                                                                                                                                          | Pages 7                  |
|                          |     | (c) Explain how missing data were addressed                                                                                                                                                                  | N/A                      |
|                          |     | (d) If applicable, explain how loss to follow-up was addressed                                                                                                                                               | N/A                      |
|                          |     | (e) Describe any sensitivity analyses                                                                                                                                                                        | Pages 7                  |
| <b>Results</b>           |     |                                                                                                                                                                                                              |                          |
| Participants             | 13* | (a) Report numbers of individuals at each stage of study—eg numbers potentially eligible, examined for eligibility, confirmed eligible, included in the study, completing follow-up, and analysed            | pages 8 and figure 1     |
|                          |     | (b) Give reasons for non-participation at each stage                                                                                                                                                         | N/A                      |
|                          |     | (c) Consider use of a flow diagram                                                                                                                                                                           | Figure 1                 |
| Descriptive data         | 14* | (a) Give characteristics of study participants (eg demographic, clinical, social) and information on exposures and potential confounders                                                                     | pages 8-9 and tables 1-2 |
|                          |     | (b) Indicate number of participants with missing data for each variable of interest                                                                                                                          | Tables 1-2               |
|                          |     | (c) Summarise follow-up time (eg, average and total amount)                                                                                                                                                  | N/A                      |
| Outcome data             | 15* | Report numbers of outcome events or summary measures over time                                                                                                                                               | Tables 3                 |
| Main results             | 16  | (a) Give unadjusted estimates and, if applicable, confounder-adjusted estimates and their precision (eg, 95% confidence interval). Make clear which confounders were adjusted for and why they were included | pages 11-14; table 4-5   |
|                          |     | (b) Report category boundaries when continuous variables were categorized                                                                                                                                    | N/A                      |
|                          |     | (c) If relevant, consider translating estimates of relative risk into absolute risk for a meaningful time period                                                                                             | N/A                      |
| Other analyses           | 17  | Report other analyses done—eg analyses of subgroups and interactions, and sensitivity analyses                                                                                                               | Page 14                  |
| <b>Discussion</b>        |     |                                                                                                                                                                                                              |                          |
| Key results              | 18  | Summarise key results with reference to study objectives                                                                                                                                                     | Page 14                  |
| <b>Limitations</b>       |     |                                                                                                                                                                                                              |                          |
| Interpretation           | 20  | Give a cautious overall interpretation of results considering objectives, limitations, multiplicity of analyses, results from similar studies, and other relevant evidence                                   | Pages 14-17              |
| Generalisability         | 21  | Discuss the generalisability (external validity) of the study results                                                                                                                                        | pages 5 and 14           |
| <b>Other information</b> |     |                                                                                                                                                                                                              |                          |
| Funding                  | 22  | Give the source of funding and the role of the funders for the present study and, if applicable, for the original study on which the present article is based                                                | Page 19                  |

\*Give information separately for cases and controls in case-control studies and, if applicable, for exposed and unexposed groups in cohort and cross-sectional studies.

1  
2  
3  
4  
5  
6  
7  
8  
9  
10  
11  
12  
13  
14  
15  
16  
17  
18  
19  
20  
21  
22  
23  
24  
25  
26  
27  
28  
29  
30  
31  
32  
33  
34  
35  
36  
37  
38  
39  
40  
41  
42  
43  
44  
45  
46  
47

**Note:** An Explanation and Elaboration article discusses each checklist item and gives methodological background and published examples of transparent reporting. The STROBE checklist is best used in conjunction with this article (freely available on the Web sites of PLoS Medicine at <http://www.plosmedicine.org/>, Annals of Internal Medicine at <http://www.annals.org/>, and Epidemiology at <http://www.epidem.com/>). Information on the STROBE Initiative is available at [www.strobe-statement.org](http://www.strobe-statement.org).

For peer review only

# BMJ Open

## Differences in rates and odds for emergency caesarean section in six Palestinian hospitals: a population-based birth cohort study.

|                                 |                                                                                                                                                                                                                                                                                                                                                                                                                                                                                                                                                                                                                                                                                                                                                                                                                                                                                                                                                                                                                                                                                                                                                                                                                                                                                                                                                                                                                                                                                                           |
|---------------------------------|-----------------------------------------------------------------------------------------------------------------------------------------------------------------------------------------------------------------------------------------------------------------------------------------------------------------------------------------------------------------------------------------------------------------------------------------------------------------------------------------------------------------------------------------------------------------------------------------------------------------------------------------------------------------------------------------------------------------------------------------------------------------------------------------------------------------------------------------------------------------------------------------------------------------------------------------------------------------------------------------------------------------------------------------------------------------------------------------------------------------------------------------------------------------------------------------------------------------------------------------------------------------------------------------------------------------------------------------------------------------------------------------------------------------------------------------------------------------------------------------------------------|
| Journal:                        | <i>BMJ Open</i>                                                                                                                                                                                                                                                                                                                                                                                                                                                                                                                                                                                                                                                                                                                                                                                                                                                                                                                                                                                                                                                                                                                                                                                                                                                                                                                                                                                                                                                                                           |
| Manuscript ID                   | bmjopen-2017-019509.R2                                                                                                                                                                                                                                                                                                                                                                                                                                                                                                                                                                                                                                                                                                                                                                                                                                                                                                                                                                                                                                                                                                                                                                                                                                                                                                                                                                                                                                                                                    |
| Article Type:                   | Research                                                                                                                                                                                                                                                                                                                                                                                                                                                                                                                                                                                                                                                                                                                                                                                                                                                                                                                                                                                                                                                                                                                                                                                                                                                                                                                                                                                                                                                                                                  |
| Date Submitted by the Author:   | 04-Feb-2018                                                                                                                                                                                                                                                                                                                                                                                                                                                                                                                                                                                                                                                                                                                                                                                                                                                                                                                                                                                                                                                                                                                                                                                                                                                                                                                                                                                                                                                                                               |
| Complete List of Authors:       | Zimmo, Mohammed; Department of Obstetrics, Al Shifa Hospital, Gaza, Palestine, obstetrics and gynaecology; Institute for clinical medicine, Faculty of Medicine, University of Oslo, Oslo, Norway, Department of Obstetrics<br>Laine, Katariina; Oslo University Hospital, Department of Obstetrics; University of Oslo, Department of Health Management and Health Economics, Institute of Health and Society<br>Hassan, Sahar; Institute of Community and Public Health, Birzeit University, Palestine; Faculty of Nursing, Pharmacy and Health Professions, Birzeit University, Palestine<br>Fosse, Erik; The Intervention Centre, Oslo University Hospital Rikshospitalet, Oslo, Norway; Institute for clinical medicine, Faculty of Medicine, University of Oslo, Oslo, Norway<br>Lieng, Marit; Oslo University Hospital, Ullevål, Department of Obstetrics<br>Ali-Masri, Hadil; Department of Obstetrics, Palestine Medical Complex hospital, Ramallah, Palestine; Institute for clinical medicine, Faculty of Medicine, University of Oslo, Oslo, Norway<br>zimmo, kaled; Al Aqsa Hospital, Obstetrics Department; Intervention Centre, Oslo University Hospital Rikshospitalet<br>Anti, Marit; Hoyskolen Campus Kristiania Markedshoyskolen<br>Bottcher, Bettina.; Faculty of Medicine<br>Sørum Falk, Ragnhild; Research Support Services, Oslo University Hospital, Oslo Centre for Biostatistics and Epidemiology<br>Vikanes, Åse; Intervention Centre, Oslo University Hospital Rikshospitalet |
| <b>Primary Subject Heading</b>: | Obstetrics and gynaecology                                                                                                                                                                                                                                                                                                                                                                                                                                                                                                                                                                                                                                                                                                                                                                                                                                                                                                                                                                                                                                                                                                                                                                                                                                                                                                                                                                                                                                                                                |
| Secondary Subject Heading:      | Health services research, Obstetrics and gynaecology                                                                                                                                                                                                                                                                                                                                                                                                                                                                                                                                                                                                                                                                                                                                                                                                                                                                                                                                                                                                                                                                                                                                                                                                                                                                                                                                                                                                                                                      |
| Keywords:                       | Maternal medicine < OBSTETRICS, OBSTETRICS, Prenatal diagnosis < OBSTETRICS                                                                                                                                                                                                                                                                                                                                                                                                                                                                                                                                                                                                                                                                                                                                                                                                                                                                                                                                                                                                                                                                                                                                                                                                                                                                                                                                                                                                                               |
|                                 |                                                                                                                                                                                                                                                                                                                                                                                                                                                                                                                                                                                                                                                                                                                                                                                                                                                                                                                                                                                                                                                                                                                                                                                                                                                                                                                                                                                                                                                                                                           |

SCHOLARONE™  
Manuscripts

## Differences in rates and odds for emergency caesarean section in six

### Palestinian hospitals: a population-based birth cohort study

Mohammed W. Zimmo, MD, MD, PhD candidate,<sup>1-3</sup> Katariina Laine, MD, PhD,<sup>4,5</sup> Sahar Hassan, PhD,<sup>6</sup> Erik Fosse, MD, PhD,<sup>2,3</sup> Marit Lieng, MD, PhD,<sup>2,7</sup> Hadil Ali-Masri, MD, PhD candidate,<sup>2,3,8</sup> Kaled Zimmo, MD, PhD candidate,<sup>2,3,9</sup> Marit Anti, PhD,<sup>10</sup> Bettina Bottcher, PhD,<sup>11</sup> Ragnhild Sørnum Falk, PhD,<sup>12</sup> Åse Vikanes, PhD<sup>3</sup>

#### Addresses:

<sup>1</sup>Obstetrics Department, Al Shifa Hospital, Gaza, Palestine

<sup>2</sup>Institute for Clinical Medicine, Faculty of Medicine, University of Oslo, Norway

<sup>3</sup>Intervention Centre, Oslo University Hospital Rikshospitalet, Oslo, Norway

<sup>4</sup>Department of Obstetrics, Oslo University Hospital, Ullevål, Oslo, Norway

<sup>5</sup>Department of Health Management and Health Economics, Institute of Health and Society, University of Oslo, Norway

<sup>6</sup>Faculty of Pharmacy, Nursing, and Health Professions, Birzeit University, Palestine

<sup>7</sup>Department of Gynecology, Oslo University Hospital, Ullevål, Oslo, Norway

<sup>8</sup>Obstetrics Department, Palestine Medical complex, West Bank, Palestine

<sup>9</sup>Obstetrics Department, Al Aqsa Hospital, Gaza, Palestine

<sup>10</sup>Oslo School of Management, Oslo, Norway

<sup>11</sup>Faculty of Medicine, Islamic University, Gaza, Palestine

<sup>12</sup>Oslo Centre for Biostatistics and Epidemiology, Research Support Services, Oslo University Hospital, Oslo, Norway

#### Corresponding author:

Mohammed Walid Zimmo

241/47 Gaza, Palestine

Mobile No.: +972595325896

Word count: 3169

Tables No.: 5

Supplementary figure: 1



E-mail address: [mohammedzimmo1983@gmail.com](mailto:mohammedzimmo1983@gmail.com)

References No.: 29

**Keywords:** caesarean section, emergency, Palestine, rate, odds.

## Abstract

**Objective:** To assess the differences in rates and odds for emergency caesarean section among singleton pregnancies in six governmental Palestinian hospitals.

**Design:** A prospective population-based birth cohort study.

**Setting:** Obstetric departments in six governmental Palestinian hospitals.

**Participants:** 32 321 women scheduled to deliver vaginally from 1 March 2015, until 29 February 2016.

**Methods:** To assess differences in sociodemographic and antenatal obstetric characteristics by hospital, chi-square test, ANOVA analysis and Kruskal-Wallis test were applied. Logistic regression was used to estimate differences in odds for emergency caesarean section, odds ratios (OR) with 95% confidence intervals (CI) were assessed.

## Main outcome measures

The primary outcome was the adjusted ORs of emergency caesarean section among singleton pregnancies for five Palestinian hospitals as compared to the reference (Hospital 1).

**Results:** The prevalence of emergency caesarean section varied across hospitals, ranging from 5.8% and 22.6% among primiparous women, and between 4.8% and 13.1% among parous women. Compared to the reference hospital the OR for emergency caesarean section were increased in all other hospitals; crude ORs ranging from 1.95 (95% CI 1.42–2.67) to 4.75 (95% CI 3.49–6.46) among primiparous women. For parous women these differences were less pronounced; crude ORs ranging from 1.37 (95% CI 1.13–1.67) to 2.99 (95% CI 2.44–3.65). After adjustment for potential confounders, the ORs were reduced but still statistically significant, except for one hospital among parous women.

1  
2  
3 **Conclusion:** Substantial differences in odds for emergency caesarean section between the six  
4  
5 Palestinian governmental hospitals were observed. These could not be explained by the  
6  
7 studied sociodemographic or antenatal obstetric characteristics.  
8

9 *Strengths and limitations of the study*  
10

- 11 • This study is the largest, population-based, prospective birth cohort study in Palestine,  
12 which includes both Gaza and West Bank hospitals  
13
- 14 • All singleton pregnant women aiming to give birth vaginally in the six study hospitals  
15 were included, reducing the risk for selection bias.  
16
- 17 • The main limitation of this study was the large proportion of missing data on mode of  
18 deliveries in one of the study hospitals. The missing data were expected to be random,  
19 and therefore not influencing the exposure-outcome associations studied.  
20
- 21 • Data on diabetes before and during pregnancy were not registered accurately and could  
22 therefore not be used for analyses.  
23
- 24 • Inaccurate registration of maternal weight and place of residence in some hospitals.  
25  
26  
27  
28  
29  
30  
31  
32  
33  
34  
35  
36  
37  
38  
39  
40  
41  
42  
43  
44  
45  
46  
47  
48  
49  
50  
51  
52  
53  
54  
55  
56  
57  
58  
59  
60

## Introduction

Caesarean section is one of the most common surgical procedures worldwide.<sup>1</sup> The rate of caesarean section has increased globally from 7% in 1990 to 19% in 2014.<sup>2</sup> This increase in caesarean section rates is, however, not associated with improved outcomes for mothers and newborns.<sup>3</sup> Although delivery by caesarean section is considered safe, it is associated with adverse short term as well as long term consequences for mothers and children.<sup>4</sup> The most worrying rise in caesarean section rate is therefore seen among healthy primiparous women with singleton pregnancies at term, who were having a low risk of caesarean section. This rise was significantly higher in women who underwent induction of labor.<sup>5</sup>

Despite international evidence-based guidelines for indications of caesarean section, the caesarean section rates vary between countries (from 5% in Sub-Saharan Africa to around 40% in Latin America) and even between hospitals within the same countries.<sup>2,6</sup> A study found that different caesarean section rates in National Health Service (NHS) Trusts in the UK were mainly restricted to emergency caesarean section and not to planned caesarean sections.<sup>6</sup> Another study reported that differences in maternal or fetal risk factors do not explain the variations in caesarean section rates.<sup>7</sup> Healthcare professionals decision to perform caesarean section is known to be influenced by cultural factors, legal liability as well as medical evidence.<sup>8</sup>

In Palestine, two previous studies on caesarean section rates have been published.<sup>9,10</sup> A study from Makassed Charitable Hospital in East Jerusalem, including 6804 women showed that the caesarean section rate increased from 9.4% to 14.4% between 1993 and 2002.<sup>10</sup> Another study in 2006, using data from the Palestinian Family Health Survey of 6113 women from Gaza and the West Bank, reported an increase in caesarean section rates from 6.0% in 1996 to 14.8% in 2006.<sup>9</sup> Both studies lacked information on potential confounders. According to the Palestinian Ministry of Health in 2015, the overall caesarean section rate was 23.2%.<sup>11</sup> Since these studies

1  
2  
3 were published, the political situation in the occupied Palestinian Territories has become more  
4  
5 challenging given the siege on Gaza, which is recently reported to influence health services.<sup>12</sup>  
6

7 The main aim of this study was to explore any differences in rates and odds for emergency  
8  
9 caesarean section among singleton pregnancies in six governmental hospitals in Palestine.  
10

## 11 **Methods**

12  
13 The data were obtained from a population-based birth cohort study in six Palestinian  
14  
15 governmental hospitals from 1 March 2015, until 29 February 2016. Three hospitals (1, 2 and  
16  
17 3) were located in Gaza and three (4, 5 and 6) in the West Bank. All hospitals were teaching  
18  
19 hospitals except one (Hospital 2). Teaching hospitals in Palestine have educational programs  
20  
21 for health personnel; such as nurses, midwives and medical doctors. All were referral  
22  
23 hospitals, except one (Hospital 1). Referral hospitals in Palestine receive patients from other  
24  
25 governmental or private hospitals in the neighbouring areas. Hospital 1, being non-referral,  
26  
27 was the only one without a maternal intensive care unit.  
28  
29

30  
31 All women planned for vaginal delivery were included in the study. Women planned for  
32  
33 elective caesarean section, those with two or more previous caesarean sections, multiple  
34  
35 gestations and those with missing information about the actual mode of delivery were  
36  
37 excluded from the study sample (see online supplementary figure 1).  
38

### 39 *Data collection and entry*

40  
41  
42 A case registration form, developed by Palestinian and Norwegian obstetricians and  
43  
44 midwives, was used to collect data on maternal sociodemographic, antenatal obstetric  
45  
46 characteristics and mode of delivery prospectively.<sup>13</sup> Before the data collection started,  
47  
48 research teams in each hospital were established, comprising the heads of obstetric  
49  
50 departments, medical doctors and midwives working in the labour wards. The case  
51  
52 registration form was filled in by doctors and midwives attending the births. The registered  
53  
54 data were entered by research teams into a tailor made version of District Health Information  
55  
56  
57  
58  
59  
60

1  
2  
3 Software 2 (DHIS2, version 2.24). DHIS 2 has been created by the Department of Global  
4  
5 Infrastructure at the University of Oslo. It is a free, adaptable web-based open-source  
6  
7 information system tool developed with support from the Norwegian Agency for  
8  
9 Development (NORAD). Data were transferred from DHIS2 to be stored in Service for  
10  
11 Sensitive Data (TSD) platform which is developed and operated by the University of Oslo for  
12  
13 researchers to collect, store, analyse and share sensitive data in compliance with the  
14  
15 Norwegian regulations regarding individuals' privacy (tsd-drift@usit.uio.no).

### 16 17 *Risk factors*

18  
19 Data on maternal pre-pregnancy weight and height were obtained from the mother and child  
20  
21 health handbook and if the booklet was unavailable, the medical teams obtained this  
22  
23 information by asking the women.

24  
25 Maternal age was categorized into five-year age groups (table 1). Place of residence was  
26  
27 dichotomised into camp or urban-rural area. Maternal education was categorised into three  
28  
29 groups according to length of education (table 1). Pre-pregnancy body mass index was  
30  
31 categorised according to the World Health Organization classification:  $\leq 18.5$ , 18.5-24.9, 25.0-  
32  
33 29.9 and  $\geq 30.0$  kg/m<sup>2</sup>.<sup>14</sup> Mode of delivery was dichotomised into vaginal (normal and assisted  
34  
35 vaginal) and emergency caesarean section.

36  
37 Parity was dichotomised into primiparous and parous women. Primiparous women have had  
38  
39 no previous delivery, whereas parous women had one or more previous deliveries. Previous  
40  
41 caesarean section was dichotomised into no/yes. Number of antenatal visits was categorised  
42  
43 into four groups:  $<3$ , 4-7,  $\geq 8$  visits. In vitro fertilisation treatment was dichotomised into  
44  
45 no/yes. Hypertensive disorder, which included hypertension before as well as during  
46  
47 pregnancy and preeclampsia, was dichotomised into no/yes. Induction of labour, by  
48  
49 misoprostol or balloon catheter, was dichotomised into no/yes. Unknown information of  
50  
51 hypertensive disorder and induction of labour were considered as no disorder/induction.  
52  
53  
54  
55  
56  
57  
58  
59  
60

### *Outcomes*

The primary outcome was the adjusted odds ratios of emergency caesarean section among singleton pregnancies for five Palestinian hospitals as compared to the reference (Hospital 1). Emergency caesarean section covered a wide range of clinical situations from an immediate threat to the mother or baby to conditions requiring early delivery. The criteria for emergency caesarean section in this study reflect Lucas urgency classification one, two and three.<sup>15</sup>

### *Statistical analysis*

Descriptive analyses were conducted for the baseline characteristics of the women. To assess differences by hospitals, comparison of proportions was tested by chi-square test, differences in means by one-way ANOVA analysis and differences in median by Kruskal-Wallis test. In order to study the effect of the hospital on the odds of emergency caesarean section, logistic regression analyses were applied; stratified according to parity. Sociodemographic characteristics (age, place of residence, education, body mass index) and antenatal obstetric characteristics (number of children alive, previous caesarean section, number of antenatal visits, in vitro fertilisation treatment, hypertensive disorder and induction of labour) were included as potential confounders. Three separate models were performed. Model 1 assessed the influence of sociodemographic characteristics, Model 2 antenatal obstetric characteristics and Model 3 included both sociodemographic and antenatal obstetric characteristics in combined. The strength of the association between each variable and the odds of emergency caesarean section was estimated by odds ratios (ORs) with 95% confidence intervals (CIs). Due to low numbers in categories,  $\leq 18.5$  and  $18.5-24.9$  kg/m<sup>2</sup> of body mass index, they merged into one group in regression analyses. The proportion of missing data was low (<5%), therefore, multiple imputation was not considered. Multicollinearity of independent variables was checked via the variance inflation factor statistic. For primiparous women, education had to be excluded due to multicollinearity. We

found no multicollinearity among parous women. Interaction between hospital and the adjusting variables were explored by entering product terms, one at a time, into the model.

Interactions with  $p < 0.001$  were reported in the text.

P values  $< 0.05$  were considered statistically significant. All statistical analyses were performed using SPSS 22 (SPSS Inc., Chicago, IL, USA).

## Results

During the study period 35 109 women gave birth. In total 32 321 singleton pregnant women were planned for vaginal birth and included in this study. Of these women, 2932 (9.1%) were delivered by emergency caesarean section.

Significant differences were found between the hospitals for maternal age, place of residence, education and body mass index; all p-values  $< 0.001$ . Hospital 3 had the largest proportion of the youngest women giving birth with 17.3% being 20 years old or younger. In contrast, Hospital 2 had the largest proportion of the oldest women delivering, where approximately 2% were aged 40 years or more.

There were significant differences between hospitals regarding women living in refugee camps ranging from 0.3% in Hospital 4 to 41.2% in Hospital 3. Almost 60% had between 10-12 years of education, ranging from 34.6% in Hospital 6 to 64.6% in Hospital 3. More than 80% (27 172) of the women had a body mass index  $\geq 25$  kg/m<sup>2</sup> (table 1).

Table 1: Sociodemographic characteristics of the study population (N=32 321)

|                     | Gaza                            |                                 |                                   | West Bank                       |                                 |                                 | p value* |
|---------------------|---------------------------------|---------------------------------|-----------------------------------|---------------------------------|---------------------------------|---------------------------------|----------|
|                     | Hospital 1<br>(N=4674)<br>N (%) | Hospital 2<br>(N=4895)<br>N (%) | Hospital 3<br>(N=10 849)<br>N (%) | Hospital 4<br>(N=5519)<br>N (%) | Hospital 5<br>(N=3626)<br>N (%) | Hospital 6<br>(N=2758)<br>N (%) |          |
| <b>Maternal age</b> |                                 |                                 |                                   |                                 |                                 |                                 |          |
| ≤20                 | 519 (11.8)                      | 472 (9.9)                       | 1823 (17.3)                       | 839 (15.2)                      | 380 (10.5)                      | 305 (11.3)                      | <0.001   |
| 21-25               | 1669 (37.9)                     | 1570 (32.9)                     | 4058 (38.5)                       | 1845 (33.5)                     | 1367 (37.9)                     | 1067 (39.6)                     |          |
| 26-30               | 1230 (28.0)                     | 1440 (30.2)                     | 2616 (24.8)                       | 1401 (25.4)                     | 1021 (28.3)                     | 708 (26.3)                      |          |
| 31-35               | 628 (14.3)                      | 818 (17.2)                      | 1293 (12.3)                       | 849 (15.4)                      | 562 (15.6)                      | 395 (14.7)                      |          |
| 36-40               | 285 (6.5)                       | 369 (7.7)                       | 590 (5.6)                         | 481 (8.7)                       | 218 (6.0)                       | 179 (6.6)                       |          |

|                           |             |             |             |             |             |             |        |
|---------------------------|-------------|-------------|-------------|-------------|-------------|-------------|--------|
| >40                       | 69 (1.6)    | 98 (2.1)    | 158 (1.5)   | 98 (1.8)    | 58 (1.6)    | 40 (1.5)    |        |
| Missing                   | 274         | 128         | 311         | 6           | 20          | 64          |        |
| <b>Place of residence</b> |             |             |             |             |             |             |        |
| Urban/rural               | 3636 (84.4) | 4640 (97.0) | 6333 (58.8) | 5498 (99.7) | 3516 (97.2) | 2548 (93.6) | <0.001 |
| Camp                      | 673 (15.6)  | 144 (3.0)   | 4436 (41.2) | 14 (0.3)    | 100 (2.8)   | 175 (6.4)   |        |
| Missing                   | 365         | 111         | 80          | 7           | 10          | 35          |        |
| <b>Education, (years)</b> |             |             |             |             |             |             |        |
| ≤9                        | 553 (11.8)  | 190 (3.9)   | 448 (4.1)   | 839 (15.2)  | 534 (14.7)  | 1111 (40.3) | <0.001 |
| 10-12                     | 2791 (59.8) | 2885 (59.0) | 6995 (64.6) | 3075 (55.8) | 1748 (48.2) | 954 (34.6)  |        |
| ≥13                       | 1327 (28.4) | 1818 (37.2) | 3389 (31.3) | 1598 (29.0) | 1342 (37.0) | 692 (25.1)  |        |
| Missing                   | 3           | 2           | 17          | 7           | 2           | 1           |        |
| <b>Body Mass Index</b>    |             |             |             |             |             |             |        |
| ≤18.5                     | 2 (0.0)     | 2 (0.0)     | 3 (0.0)     | 4 (0.1)     | 4 (0.1)     | 1 (0.1)     | <0.001 |
| 18.5-24.9                 | 514 (12.3)  | 393 (8.1)   | 533 (4.9)   | 978 (17.9)  | 766 (21.3)  | 344 (18.6)  |        |
| 25-29.9                   | 2400 (57.5) | 2811 (58.0) | 2325 (21.6) | 2597 (47.4) | 1711 (47.5) | 980 (53.0)  |        |
| ≥30                       | 1256 (30.1) | 1638 (33.8) | 7915 (73.5) | 1898 (34.7) | 1118 (31.1) | 523 (28.3)  |        |
| Missing                   | 502         | 51          | 73          | 42          | 27          | 910         |        |

p-value from chi-square test is used to test the difference between hospitals

Table 2 describes the antenatal obstetric characteristics of all births. About 25% of women were primiparous. Furthermore, women in Hospitals 4 and 5 had significantly more induction of labour than other hospitals (table 2). There were significant differences in hypertensive disorders between hospitals ranging from 0.9% in Hospital 6 to 4.4% in Hospital 3. The numbers of antenatal visits varied between hospitals. The women in Hospitals 1, 2 and 3 in Gaza had around 5 antenatal visits (SD 2.0; range 0–24) compared to nine (SD 2.9; range 0–29) in Hospitals 4, 5 and 6 in the West Bank (table 2). Less than 1% of women in all hospitals had undergone in vitro fertilization treatment.

Table 2: Antenatal obstetric characteristics of the study population (N=32 321)

|  | Hospital 1<br>(N=4674) | Hospital 2<br>(N=4895) | Hospital 3<br>(N=10 849) | Hospital 4<br>(N=5519) | Hospital 5<br>(N=3626) | Hospital 6<br>(N=2758) | p value |
|--|------------------------|------------------------|--------------------------|------------------------|------------------------|------------------------|---------|
|  |                        |                        |                          |                        |                        |                        |         |



|                                                                                  | N (%)       | N (%)       | N (%)         | N (%)       | N (%)       | N (%)       |           |
|----------------------------------------------------------------------------------|-------------|-------------|---------------|-------------|-------------|-------------|-----------|
|                                                                                  | Gaza        |             |               | West Bank   |             |             |           |
| <b>Parity</b>                                                                    |             |             |               |             |             |             |           |
| Primiparous                                                                      | 1072 (22.9) | 1223 (25.0) | 2846 (26.2)   | 1217 (22.1) | 1002 (27.6) | 749 (27.2)  | <0.001*   |
| Parous                                                                           | 3600 (77.1) | 3672 (75.0) | 8001 (73.8)   | 4302 (77.9) | 2624 (72.4) | 2008 (72.8) |           |
| Missing                                                                          | 2           | 0           | 2             | 0           | 0           | 1           |           |
| <b>Number of children alive among parous women, median (interquartile range)</b> | 2 (2)       | 2 (3)       | 1 (3)         | 2 (3)       | 1 (3)       | 1 (3)       | <0.001*** |
| <b>Previous caesarean among parous women</b>                                     |             |             |               |             |             |             |           |
| 0                                                                                | 3419 (95.0) | 3393 (92.4) | 7161 (89.5)   | 3704 (86.1) | 2295 (87.5) | 1869 (93.1) | <0.001*   |
| 1                                                                                | 181 (5.0)   | 279 (7.6)   | 840 (10.5)    | 598 (13.9)  | 329 (12.5)  | 139 (6.9)   |           |
| <b>Number of antenatal visits, mean (SD)</b>                                     | 5.12 (1.97) | 5.75 (1.98) | 5.53 (1.97)   | 9.06 (3.06) | 8.60 (2.16) | 9.64 (3.42) | <0.001**  |
| <b>Number of antenatal visits</b>                                                |             |             |               |             |             |             |           |
| ≤3                                                                               | 947 (20.3)  | 181 (3.7)   | 1358 (12.5)   | 221 (4.0)   | 84 (2.3)    | 103 (3.7)   | <0.001*   |
| 4-7                                                                              | 3171 (67.9) | 3783 (77.4) | 7334 (67.7)   | 1068 (19.4) | 677 (18.7)  | 439 (16.0)  |           |
| ≥8                                                                               | 553 (11.8)  | 923 (18.9)  | 2146 (19.8)   | 4212 (76.6) | 2859 (79.0) | 2209 (67.1) |           |
| Missing                                                                          | 3           | 8           | 11            | 18          | 6           | 7           |           |
| <b>In vitro fertilization treatment</b>                                          |             |             |               |             |             |             |           |
| Yes                                                                              | 26 (0.6)    | 13 (0.3)    | 35 (0.3)      | 32 (0.6)    | 19 (0.5)    | 14 (0.5)    | <0.043*   |
| No                                                                               | 4476 (99.4) | 4809 (99.7) | 10 507 (99.7) | 5471 (99.4) | 3592 (99.5) | 2723 (99.5) |           |
| Missing                                                                          | 172         | 73          | 307           | 16          | 15          | 21          |           |
| <b>Hypertensive disorder</b>                                                     |             |             |               |             |             |             |           |
| Yes                                                                              | 155 (3.3)   | 147 (3.0)   | 473 (4.4)     | 158 (2.9)   | 68 (1.9)    | 26 (0.9)    | <0.001*   |
| No/unknown                                                                       | 4519 (96.7) | 4748 (97.0) | 10 376 (95.6) | 5361 (97.1) | 3558 (98.1) | 2732 (99.1) |           |
| <b>Induction of labour</b>                                                       |             |             |               |             |             |             |           |
| Yes                                                                              | 373 (8.0)   | 549 (11.2)  | 1424 (13.1)   | 1027 (18.6) | 601 (16.6)  | 324 (11.7)  | <0.001*   |
| No/Unknown                                                                       | 4301 (92.0) | 4346 (88.8) | 9425 (86.9)   | 4492 (81.4) | 3025 (83.4) | 2434 (88.3) |           |

SD= standard deviation.

\* p-value from chi-square test is used to test the difference between hospitals.

\*\* p-value from analysis of variance by ANOVA test is used to test the difference between hospitals.

\*\*\* p-value from analysis of variance by Kruskal-Wallis test

Significant differences in the prevalence of emergency caesarean section between hospitals were observed, for primiparous as well as parous women. Among primiparous women, the prevalence was 12.4%, ranging from 5.8% in Hospital 1 to 22.6% in Hospital 6. Likewise for parous women, the prevalence was 7.9%, ranging from 4.8% in Hospital 1 to 13.1% in Hospital 6 (table 3).

Table 3: Prevalence of emergency caesarean section in the study hospitals

|                                    | Hospital 1<br>(N=4674) | Hospital 2<br>(N=4895) | Hospital 3<br>(N=10 849) | Hospital 4<br>(N=5519) | Hospital 5<br>(N=3626) | Hospital 6<br>(N=2758) | p<br>value*** |
|------------------------------------|------------------------|------------------------|--------------------------|------------------------|------------------------|------------------------|---------------|
|                                    | Gaza                   |                        |                          | West Bank              |                        |                        |               |
| <b>Emergency caesarean section</b> | % (N)*                 | % (N)*                 | % (N)*                   | % (N)*                 | % (N)*                 | % (N)*                 |               |
| All women                          | 5.0<br>(235/4674)      | 8.0<br>(391/4895)      | 9.4<br>(1015/10 849)     | 7.4<br>(409/5519)      | 12.4<br>(450/3626)     | 15.7<br>(432/2758)     | <0.001        |
| <b>Parity</b>                      | % (N)**                | % (N)**                | % (N)**                  | % (N)**                | % (N)**                | % (N)**                |               |
| Primiparous women                  | 5.8<br>(62/1072)       | 10.9<br>(133/1223)     | 12.8<br>(365/2846)       | 10.7<br>(130/1217)     | 15.0<br>(150/1002)     | 22.6<br>(169/749)      | <0.001        |
| Parous women                       | 4.8<br>(173/3600)      | 7.0<br>(258/3672)      | 8.1<br>(650/8001)        | 6.5<br>(279/4302)      | 11.4<br>(300/2624)     | 13.1<br>(263/2008)     | <0.001        |

\*N=number of emergency caesarean section/ total number of deliveries in the hospital.

\*\*N=number of emergency caesarean section/ total number of deliveries among women group in the hospital.

\*\*\*p-value from chi-square test.

Among primiparous women, the ORs for emergency caesarean section differed by hospital (table 4). Hospital 1 had the lowest prevalence of emergency caesarean section, and was thus considered the reference hospital. The largest difference was found for Hospital 6, crude OR 4.75 (95% CI 3.49 to 6.46). When adjusting for potential confounders, the ORs for different hospitals were reduced, but still statistically significant (table 4, model 3). When checking for interaction, the body mass index modified the effect of hospitals. In Hospital 3, the OR

decreased with increasing body mass index (body mass index  $\geq 30$ : OR 0.31, 95% CI 0.11 to 0.90), whereas the other hospitals had increased ORs with increasing body mass index.

Table 4: Odds ratio (OR) and 95% confidence intervals (CIs) for emergency caesarean section among primiparous women in the participating hospitals (N=8109)

|                                           | Crude OR<br>(95% CI) | Model 1 <sup>*</sup><br>OR (95% CI) | Model 2 <sup>**</sup><br>OR (95% CI) | Model 3 <sup>**</sup><br>OR (95% CI) |
|-------------------------------------------|----------------------|-------------------------------------|--------------------------------------|--------------------------------------|
| <b>Hospitals</b>                          |                      |                                     |                                      |                                      |
| Hospital 1                                | REF                  | REF                                 | REF                                  | REF                                  |
| Hospital 2                                | 1.99 (1.45 to 2.72)  | 1.90 (1.34 to 2.70)                 | 1.99 (1.44 to 2.75)                  | 1.87 (1.30 to 2.68)                  |
| Hospital 3                                | 2.40 (1.81 to 3.17)  | 2.40 (1.73 to 3.33)                 | 2.43 (1.82 to 3.24)                  | 2.47 (1.77 to 3.46)                  |
| Hospital 4                                | 1.95 (1.42 to 2.67)  | 2.33 (1.64 to 3.31)                 | 1.58 (1.11 to 2.25)                  | 1.84 (1.24 to 2.73)                  |
| Hospital 5                                | 2.87 (2.11 to 3.91)  | 2.99 (2.12 to 4.22)                 | 2.49 (1.77 to 3.50)                  | 2.53 (1.74 to 3.70)                  |
| Hospital 6                                | 4.75 (3.49 to 6.46)  | 4.28 (2.94 to 6.22)                 | 4.11 (2.87 to 5.90)                  | 3.54 (2.29 to 5.47)                  |
| <b>Maternal age (years)</b>               | 1.12 (1.10 to 1.13)  | 1.12 (1.10 to 1.14)                 |                                      | 1.12 (1.10 to 1.14)                  |
| <b>Place of residence</b>                 |                      |                                     |                                      |                                      |
| Urban/rural                               | REF                  | REF                                 |                                      | REF                                  |
| Camp                                      | 1.22 (1.04 to 1.44)  | 1.32 (1.08 to 1.61)                 |                                      | 1.24 (1.01 to 1.53)                  |
| <b>Education (years)</b>                  |                      |                                     |                                      |                                      |
| $\leq 9$                                  | REF                  | N/A ****                            |                                      | N/A ****                             |
| 10 to 12                                  | 0.50 (0.41 to 0.62)  |                                     |                                      |                                      |
| $\geq 13$                                 | 0.58 (0.47 to 0.72)  |                                     |                                      |                                      |
| <b>Body Mass Index (kg/m<sup>2</sup>)</b> |                      |                                     |                                      |                                      |
| $\leq 24.9$                               | REF                  | REF                                 |                                      | REF                                  |
| 25 to 29.9                                | 1.15 (0.91 to 1.46)  | 1.17 (0.92 to 1.50)                 |                                      | 1.12 (0.88 to 1.44)                  |
| $\geq 30$                                 | 1.50 (1.20 to 1.89)  | 1.41 (1.10 to 1.81)                 |                                      | 1.30 (1.01 to 1.68)                  |
| <b>Antenatal visits (n)</b>               | 1.07 (1.05 to 1.10)  |                                     | 1.04 (1.01 to 1.07)                  | 1.04 (1.01 to 1.07)                  |
| <b>In vitro fertilization treatment</b>   |                      |                                     |                                      |                                      |
| No                                        | REF                  |                                     | REF                                  | REF                                  |
| Yes                                       | 5.93 (3.61 to 9.75)  |                                     | 6.62 (3.97 to 11.05)                 | 4.64 (2.66 to 8.08)                  |
| <b>Hypertensive disorder</b>              |                      |                                     |                                      |                                      |
| No/unknown                                | REF                  |                                     | REF                                  | REF                                  |
| Yes                                       | 3.62 (2.75 to 4.77)  |                                     | 3.95 (2.96 to 5.28)                  | 3.56 (2.61 to 4.86)                  |
| <b>Induction of labour</b>                |                      |                                     |                                      |                                      |
| No/unknown                                | REF                  |                                     | REF                                  | REF                                  |
| Yes                                       | 1.49 (1.27 to 1.75)  |                                     | 1.33 (1.12 to 1.57)                  | 1.32 (1.10 to 1.57)                  |

\*Adjusted for sociodemographic characteristics (maternal age, place of residence, education and body mass index).

\*\*Adjusted for antenatal obstetric characteristics (antenatal visits, in vitro fertilization treatment, hypertensive disorder and induction of labour).

\*\*\* Adjusted for sociodemographic characteristics (age, place of residence, education, body mass index) and antenatal obstetric characteristics (antenatal visits, in vitro fertilization treatment, hypertensive disorder and induction of labour).

\*\*\*\*N/A= not applicable due to multicollinearity.

A similar trend was found among parous women, but the differences between hospitals were less pronounced compared to primiparous women (table 5). After including sociodemographic and antenatal obstetric confounders in the model, the difference between the hospitals was less clear but still statistically significant for all hospitals, except Hospital 4. The strongest risk factor for emergency caesarean section was previous caesarean section (OR 6.26, 95% CI 5.57 to 7.05).

Table 5: Odds ratio (OR) and 95% confidence intervals (CIs) for emergency caesarean section among parous women in the participating hospitals (N=24 210)

|                  | <b>Crude OR</b><br>(95% CI) | <b>Model 1</b><br>OR (95% CI) | <b>Model 2</b><br>OR (95% CI) | <b>Model 3</b><br>OR (95% CI) |
|------------------|-----------------------------|-------------------------------|-------------------------------|-------------------------------|
| <b>Hospitals</b> |                             |                               |                               |                               |
| Hospital 1       | REF                         | REF                           | REF                           | REF                           |
| Hospital 2       | 1.50 (1.23 to<br>1.83)      | 1.48 (1.19 to<br>1.84)        | 1.38 (1.12 to<br>1.70)        | 1.30 (1.04 to<br>1.63)        |
| Hospital 3       | 1.75 (1.47 to<br>2.08)      | 1.80 (1.48 to<br>2.20)        | 1.50 (1.25 to<br>1.80)        | 1.53 (1.25 to<br>1.89)        |
| Hospital 4       | 1.37 (1.13 to<br>1.67)      | 1.39 (1.12 to<br>1.72)        | 0.87 (0.70 to<br>1.09)        | 0.81 (0.64 to<br>1.04)        |
| Hospital 5       | 2.56 (2.11 to<br>3.09)      | 2.61 (2.11 to<br>3.23)        | 1.89 (1.52 to<br>2.34)        | 1.70 (1.34 to<br>2.16)        |

|                                           |                        |                        |                        |                        |
|-------------------------------------------|------------------------|------------------------|------------------------|------------------------|
|                                           | 3.11)                  | 3.23)                  | 2.34)                  | 2.15)                  |
| Hospital 6                                | 2.99 (2.44 to<br>3.65) | 2.28 (1.78 to<br>2.93) | 2.66 (2.12 to<br>3.34) | 1.74 (1.32 to<br>2.31) |
| <b>Maternal age (years)</b>               | 1.05 (1.04 to<br>1.06) | 1.05 (1.04 to<br>1.06) |                        | 1.07 (1.05 to<br>1.08) |
| <b>Place of residence</b>                 |                        |                        |                        |                        |
| Urban/rural                               | REF                    | REF                    |                        | REF                    |
| Camp                                      | 1.14 (1.01 to<br>1.29) | 1.24 (1.07 to<br>1.43) |                        | 1.19 (1.02 to<br>1.39) |
| <b>Education (years)</b>                  |                        |                        |                        |                        |
| ≤9                                        | REF                    | REF                    |                        | REF                    |
| 10 to 12                                  | 0.60 (0.53 to<br>0.68) | 0.86 (0.74 to<br>1.01) |                        | 0.79 (0.67 to<br>0.93) |
| ≥13                                       | 0.52 (0.45 to<br>0.60) | 0.73 (0.61 to<br>0.86) |                        | 0.62 (0.52 to<br>0.75) |
| <b>Body Mass Index (kg/m<sup>2</sup>)</b> |                        |                        |                        |                        |
| ≤24.9                                     | REF                    | REF                    |                        | REF                    |
| 25-29.9                                   | 1.25 (1.04 to<br>1.49) | 1.27 (1.05 to<br>1.53) |                        | 1.30 (1.07 to<br>1.58) |
| ≥30                                       | 1.38 (1.15 to<br>1.65) | 1.23 (1.02 to<br>1.49) |                        | 1.18 (0.97 to<br>1.43) |
| <b>Children alive (n)</b>                 | 1.02 (1 to 1.05)       |                        | 1.03 (1 to 1.05)       | 0.90 (0.87 to<br>0.94) |
| <b>Previous caesarean section</b>         |                        |                        |                        |                        |
| 0                                         | REF                    |                        | REF                    | REF                    |
| 1                                         | 6.65 (5.98 to<br>7.39) |                        | 6.85 (6.12 to<br>7.65) | 6.26 (5.57 to<br>7.05) |
| <b>Antenatal visits (n)</b>               | 1.07 (1.05 to<br>1.09) |                        | 1.05 (1.03 to<br>1.07) | 1.06 (1.04 to<br>1.08) |
| <b>In vitro fertilization treatment</b>   |                        |                        |                        |                        |
| No                                        | REF                    |                        | REF                    | REF                    |
| Yes                                       | 2.69 (1.50 to<br>4.81) |                        | 2.13 (1.09 to<br>4.16) | 1.98 (0.98 to<br>3.99) |
| <b>Hypertensive disorder</b>              |                        |                        |                        |                        |
| No/unknown                                | REF                    |                        | REF                    | REF                    |
| Yes                                       | 2.98 (2.48 to<br>3.57) |                        | 3.18 (2.60 to<br>3.89) | 3.02 (2.45 to<br>3.73) |
| <b>Induction of labour</b>                |                        |                        |                        |                        |

| No/unknown | REF                 |  | REF                 | REF                 |
|------------|---------------------|--|---------------------|---------------------|
| Yes        | 0.91 (0.78 to 1.05) |  | 0.97 (0.83 to 1.14) | 0.95 (0.80 to 1.12) |

\* Adjusted for sociodemographic characteristics (maternal age, place of residence, education and body mass index).

\*\* Adjusted for antenatal obstetric characteristics (children alive, previous caesarean section, antenatal visits, in vitro fertilization treatment, hypertensive disorder and induction of labour).

\*\*\* Adjusted for sociodemographic characteristics (age, place of residence, education, body mass index) and antenatal obstetric characteristics (children alive, previous caesarean section, antenatal visits, in vitro fertilization treatment, hypertensive disorder and induction of labour).

\*\*\*\* N/A= not applicable due to multicollinearity.

Interactions by hospital were observed for previous caesarean section and for hypertensive disorder among parous women. The OR of emergency caesarean section was 15-17 for women with previous caesarean section compared to no previous caesarean section in Hospitals 2 and 6, whereas the other hospitals had a corresponding OR of 4-8. Furthermore, an OR of 10 was observed for women with hypertensive disorder compared to those without hypertensive disorder in Hospital 1, whereas the other hospitals had a corresponding OR of 2-4 of emergency caesarean section.

## Discussion

There were notable variations between study hospitals in rate and odds for emergency caesarean section among singleton pregnancies for primiparous and parous women. Compared to the hospital with the lowest prevalence for emergency caesarean section, the crude ORs were increased in all other hospitals by up to almost fivefold for the primiparous and threefold

1  
2  
3 for parous women. The effect of sociodemographic and maternal antenatal obstetrical  
4 characteristics in odds for emergency caesarean section is in line with previous research,  
5 confirming previous caesarean section, hypertension disorder and in vitro fertilization  
6 treatment as the strongest risk factors for emergency caesarean section.<sup>16,17</sup> So far this is the  
7 largest birth cohort study in Palestine, including 32 321 women, and the first to focus on  
8 emergency caesarean section.  
9

10  
11  
12  
13  
14  
15 Caesarean section may be life-saving for both the mother and the newborn, but overuse of  
16 caesarean section does not improve maternal or perinatal health.<sup>4,18</sup> Immediate surgical  
17 complications and adverse effects in future pregnancies, such as increased risk of intrauterine  
18 fetal demise, preterm delivery, uterine abruption and abnormal placentation (praevia, accreta,  
19 increta), are reasons why caesarean section should be performed when clinically indicated  
20 only.<sup>4,19</sup> Increasing numbers of repeat caesarean sections increases the risk of severe  
21 complications on the individual level. Knowing that a previous caesarean section increases the  
22 risk for repeat caesarean section in the next pregnancy,<sup>20</sup> makes the management of the  
23 delivery of a primiparous woman a true challenge in obstetrics.  
24  
25

26  
27  
28  
29  
30  
31  
32  
33  
34  
35 Large differences in caesarean section rates between hospitals may reflect varying skills and  
36 working methods.<sup>21</sup> There are few previous studies on differences in caesarean section rates  
37 and risk between hospitals within the same country. A large study from England compared 146  
38 National Health Service (NHS) trusts, including 620 604 singleton births.<sup>6</sup> The study showed  
39 that unadjusted rates of caesarean sections among the NHS trusts differed notably, ranging  
40 from 13.6% to 31.9%. After adjustment for maternal characteristics, the caesarean section rate  
41 still varied from 14.9% to 32.1%. The main differences in caesarean section rates between  
42 trusts appeared with emergency caesarean section; ranging from 10.7% to 18.9%, compared to  
43 elective caesarean section; ranging from 7.8% to 11.2%.<sup>6</sup> The authors suggested that the  
44 remaining differences in emergency caesarean section across NHS trusts could be due to lack  
45  
46  
47  
48  
49  
50  
51  
52  
53  
54  
55  
56  
57  
58  
59  
60

1  
2  
3 of precise criteria for indications or differences in management practice, which could also be  
4  
5 the case in this study.

6  
7 Another study conducted in Lebanon included 3846 women with singleton, cephalic, viable  
8  
9 full term pregnancy.<sup>21</sup> The study examined the association between caesarean section and  
10  
11 maternal characteristics, pregnancy outcome and characteristics of maternity units. They found  
12  
13 large variations between two geographical zones of Lebanon. The authors concluded that the  
14  
15 variations between zones were due to variations in patients' access to medical care or  
16  
17 variations in clinical practice.<sup>21</sup> These findings were in line with the findings of this study, but  
18  
19 this study focused on the variations between hospitals after adjustment for risk factors.

20  
21 All hospitals in our study have a neonatal intensive care unit and five of six also have a  
22  
23 maternal intensive care unit. Hospital 1 is not a referral hospital, and does not have a maternal  
24  
25 intensive care unit for the delivering women. Thus, the lowest emergency caesarean section  
26  
27 rate in this hospital may reflect a population with lower risk for complications. All six  
28  
29 hospitals were governmental and five of the six were teaching hospitals. The non-teaching one,  
30  
31 Hospital 2, had no educational program for the non-specialist doctors, which may lead to less  
32  
33 qualified maternal care. However, this did not increase the odds for emergency caesarean  
34  
35 section in this hospital.

36  
37 A previous study from Norway showed that decision making for caesarean section delivery by  
38  
39 consultants lowered the caesarean section rates.<sup>22</sup> On call arrangements for each hospital were  
40  
41 not explored in this study and the decision making process for emergency caesarean section  
42  
43 may vary across the study hospitals due to varying involvement of a specialist in obstetrics  
44  
45 during non-office hours. In some of the study hospitals, a specialist in obstetrics is present in  
46  
47 the hospital all the time, whereas in others the specialists are available for consultations only,  
48  
49 and not present in the hospital during the evening and night. Differences in number of  
50  
51 consultations, residents and midwives may also affect the decision-making process. However,  
52  
53  
54  
55  
56  
57  
58  
59  
60



1  
2  
3 numbers of consultant, residents and midwives, reported in the previous study in these  
4  
5 hospitals, did not have a consistent effect on emergency caesarean section rates.<sup>13</sup>  
6  
7 In Palestine, there are common national guidelines for obstetrics,<sup>23</sup> but the practical training of  
8  
9 midwives and doctors may vary between hospitals. Given the large differences in odds for  
10  
11 emergency caesarean section, these guidelines may be applied differently across hospitals due  
12  
13 to differences in skills of medical staff causing different use of caesarean section instead of  
14  
15 operative vaginal delivery.<sup>24</sup> A study from the UK, including 216 maternity units, examined  
16  
17 the variation in caesarean section rates between delivery units. The study concluded that  
18  
19 organizational factors and staffing levels, women's preferences for delivery mode and the  
20  
21 clinician's attitudes may explain the variations.<sup>25</sup> Medical doctors in Palestine are neither  
22  
23 insured by their employer nor by the Palestinian Ministry of Health, and may therefore be sued  
24  
25 privately if a pregnancy complication occurs. This may also affect their use of emergency  
26  
27 caesarean section especially when vaginal births after caesarean section were indicated. It is  
28  
29 well known that the decision makers are affected by their own fear, cultural factors, legal  
30  
31 liability and medical evidence.<sup>26</sup> Also the fear of perceived risks for complaints and  
32  
33 malpractice litigation is associated with requested caesarean section delivery.<sup>27</sup> In Sweden,  
34  
35 caesarean section deliveries for non-medical reasons are 18% of all caesarean sections, and this  
36  
37 rate increased by 80% from 1990 to 2001.<sup>28</sup> Physicians' attitudes are known to influence the  
38  
39 parents' choice.<sup>26</sup> However, in governmental Palestinian hospitals maternal request without  
40  
41 medical reason is not a justified indication for caesarean section.  
42  
43  
44

#### 45 *Strengths and limitations of the study*

##### 46 *Strengths*

47  
48  
49 The strengths of this study are the population-based approach and the prospective design. The  
50  
51 data were collected for research purposes in a prospective manner. All women aiming to give  
52  
53 birth vaginally in the six study hospitals were included, reducing the risk for selection bias. A  
54  
55  
56  
57  
58  
59  
60

1  
2  
3 large number of deliveries were included and six different hospitals were compared in Gaza  
4  
5 and West Bank for the first time.

### 6 7 *Limitations*

8  
9 The main limitation of this study was the missing data on some deliveries from March 2015  
10  
11 until December 2015. In five of the six study hospitals less than 4% of data were missing, but  
12  
13 in one hospital, Hospital 6, data was missing for 28% of its deliveries.<sup>13</sup> The missing data were  
14  
15 expected to be random, not influencing the exposure-outcome associations studied. Data on  
16  
17 diabetes before and during pregnancy, known to be associated with increased risk of  
18  
19 emergency caesarean section,<sup>29</sup> were not registered accurately and could therefore not be used  
20  
21 for analyses. Moreover, exclusion for multiple pregnancies may have affected the rate of  
22  
23 emergency caesarean sections. Since this is a methodological choice, we consider exclusion of  
24  
25 multiple pregnancies to be a minor limitation of the study. Additionally, the effect of pre-  
26  
27 pregnancy body mass index increased the odds for emergency caesarean section for  
28  
29 primiparous women in hospitals except in Hospital 3, which could be due to inaccurate  
30  
31 registration of maternal weight. Furthermore, confusion existed among the data collectors in  
32  
33 distinguishing rural from urban place of residence. Thus, place of residence was dichotomized  
34  
35 as urban/rural versus camp. One further limitation was a lack of data about hospital  
36  
37 specification including available resources or staff shift patterns. However as all study  
38  
39 hospitals are governmental hospitals, it is justified to assume that no great differences exist  
40  
41 between the hospitals.  
42  
43  
44

### 45 46 **Conclusion**

47  
48 Major differences in rates and odds for emergency caesarean section were observed between  
49  
50 the six governmental Palestinian hospitals. These could not be explained by differences in the  
51  
52 studied sociodemographic or antenatal obstetrical characteristics. These findings may imply  
53  
54  
55  
56  
57  
58  
59

1  
2  
3 that factors related to doctors and their working environments are important in the decision to  
4  
5 deliver by emergency caesarean section.

### 6 7 **Acknowledgements**

8  
9 The Author would like to extend the best thanks and gratitude to the Norwegian Research  
10  
11 Council for funding this study. We do thank the Palestinian Ministry of Health for supporting  
12  
13 the study. We also appreciate the effort and time spent by research teams for data collection.  
14

### 15 16 **Contribution to authorship:**

17  
18 M. Zimmo: Charge of data collection, participated in staff training on data registration and  
19  
20 entry, statistical analysis for the data set and drafted the manuscript.

21  
22 K. Laine: Study design, protocol and research tool development, participated in staff training  
23  
24 on data registration and entry and drafted the manuscript.

25  
26 S. Hassan: Study design, collaborated in the preparation of the protocol and research tool  
27  
28 development, data collection, participated in staff training on data registration and entry and  
29  
30 commented on the manuscript.

31  
32 E. Fosse: Study design, protocol development and commented on the manuscript.

33  
34 M. Lieng: commented on the manuscript.

35  
36 K. Zimmo and H. Ali-Masri: Data collection, participated in staff training on data registration  
37  
38 and entry and commented on the manuscript.

39  
40 M. Anti: commented on the manuscript.

41  
42 B. Bottcher: revise the medical English language and commented on the manuscript.

43  
44 R. Sørnum Falk: Statistical analysis for the data set and commented on the manuscript.

45  
46 A. Vikanes: Study design, protocol and research tool development and participated in staff  
47  
48 training on data registration and entry and commented on the manuscript.  
49

50  
51 All authors approved the final version.  
52  
53  
54  
55  
56  
57

1  
2  
3 **Funding:** This work was supported by the Norwegian Research Council through Oslo  
4 University Hospital (234452/14). The funding source had no role in the study design, data  
5 collection, data analysis, data interpretation, or writing of the manuscript. All authors had full  
6 access to all the data in the study and can take responsibility for the integrity and accuracy of  
7 the data analysis and they had final responsibility for the decision to submit for publication.  
8  
9

10  
11  
12  
13 **Competing interest:** All authors have completed the ICMJE uniform disclosure form and  
14 have no conflict of interest to declare.  
15

16  
17  
18 **Ethical approval:** This study was approved by the Norwegian Data Inspectorate (17/00082-  
19 2/GRA) and the Regional Committee for Medical and Health Research Ethics in South-Eastern  
20 Norway and was considered as health quality research (REK 2014/1727). Oslo University  
21 Hospital signed an agreement with the Palestinian Ministry of Health which approved  
22 conducting the study within their facilities. The project was done in accordance with common  
23 rules for health care services in Palestine and Norway regarding confidentiality and privacy.  
24  
25  
26  
27  
28  
29

30  
31 **Data sharing statement:** No additional data are available.  
32  
33  
34  
35  
36  
37  
38  
39  
40  
41  
42  
43  
44  
45  
46  
47  
48  
49  
50  
51  
52  
53  
54  
55  
56  
57  
58  
59  
60

## References

1. Abalos E, Addo V, Brocklehurst P, et al. Caesarean section surgical techniques: 3 year follow-up of the CORONIS fractional, factorial, unmasked, randomised controlled trial. *Lancet* (London, England) 2016; **388**: 62-72.
2. Betrán AP, Ye J, Moller A-B, et al. The increasing trend in caesarean section rates: global, regional and national estimates: 1990-2014. *PloS one* 2016; **11**: e0148343.
3. Lumbiganon P, Laopaiboon M, Gülmezoglu AM, et al. Method of delivery and pregnancy outcomes in Asia: the WHO global survey on maternal and perinatal health 2007–08. *Lancet* 2010; **375**: 490-9.
4. Shorten A. Maternal and neonatal effects of caesarean section. *BMJ* 2007; **335**: 1003-4.
5. Kwee A, Elferink-Stinkens P, Reuwer P, et al. Trends in obstetric interventions in the Dutch obstetrical care system in the period 1993–2002. *European Journal of Obstetrics & Gynecology and Reproductive Biology* 2007; **132**: 70-5.
6. Bragg F, Cromwell DA, Edozien LC, et al. Variation in rates of caesarean section among English NHS trusts after accounting for maternal and clinical risk: cross sectional study. *BMJ* 2010; **341**: c5065.
7. Librero J, Peiró S, Calderón SM. Inter-hospital variations in caesarean sections. A risk adjusted comparison in the Valencia public hospitals. *Journal of epidemiology and community health* 2000; **54**: 631-6.
8. Habiba M, Kaminski M, Da Fre M, et al. Caesarean section on request: a comparison of obstetricians' attitudes in eight European countries. *BJOG: An International Journal of Obstetrics & Gynaecology* 2006; **113**: 647-56.

- 1  
2  
3 9. Abdul-Rahim H, Abu-Rmeileh N, Wick L. Cesarean section deliveries in the occupied  
4  
5 Palestinian territory (oPt): An analysis of the 2006 Palestinian Family Health Survey. *Health*  
6  
7 *policy December 2009*; **93**: 151-6.
- 8  
9 10. Mikki N, Abu Rmeileh N, Wick L, et al. Caesarean delivery rates, determinants and  
10  
11 indications in Makassed Hospital, Jerusalem 1993 and 2002. *Eastern Mediterranean Health*  
12  
13 *Journal July-August, 2009*; **15**: 868.
- 14  
15 11. P MoH. Health Status, Palestine 2015. In Ramallah, State of Palestine: Ministry of  
16  
17 Health: July 2016.
- 18  
19 12. Van den Berg MM, Madi HH, Khader A, et al. Increasing neonatal mortality among  
20  
21 Palestine refugees in the Gaza Strip. *PloS one 2015*; **10**: e0135092.
- 22  
23 13. Hassan S, Vikanes A, Laine K, et al. Building a research registry for studying birth  
24  
25 complications and outcomes in six Palestinian governmental hospitals. *BMC Pregnancy and*  
26  
27 *Childbirth 2017*; **17**: 1296-6.
- 28  
29 14. Jensen DM, Damm P, Sørensen B, et al. Pregnancy outcome and prepregnancy body  
30  
31 mass index in 2459 glucose-tolerant Danish women. *American journal of obstetrics and*  
32  
33 *gynecology 2003*; **189**: 239-44.
- 34  
35 15. Lucas D, Yentis S, Kinsella S, et al. Urgency of caesarean section: a new  
36  
37 classification. *Journal of the Royal Society of Medicine 2000*; **93**: 346-50.
- 38  
39 16. Leone T, Padmadas SS, Matthews Z. Community factors affecting rising caesarean  
40  
41 section rates in developing countries: an analysis of six countries. *Social science & medicine*  
42  
43 *2008*; **67**: 1236-46.
- 44  
45 17. Pandey S, Shetty A, Hamilton M, et al. Obstetric and perinatal outcomes in singleton  
46  
47 pregnancies resulting from IVF/ICSI: a systematic review and meta-analysis. *Human*  
48  
49 *reproduction update 2012*; **18**: 485-503
- 50  
51  
52  
53  
54  
55  
56  
57  
58  
59  
60

- 1  
2  
3 18. Deneux-Tharaux C, Carmona E, Bouvier-Colle M-H, et al. Postpartum maternal  
4 mortality and cesarean delivery. *Obstetrics & Gynecology* 2006; **108**(Part 1): 541-8.  
5  
6  
7 19. Field A, Haloob R. Complications of caesarean section. *The Obstetrician &*  
8  
9 *Gynaecologist* 2016; **18**: 265-72.  
10  
11 20. Lockwood C. Editorial Why the CD rate is on the rise (Part 1). *CONTEMPORARY OB*  
12 *GYN* 2004; **49**: 8.  
13  
14  
15 21. Carayol M, Zein A, Ghosn N, Du Mazaubrun C, Breart G. Determinants of caesarean  
16 section in Lebanon: geographical differences. *Paediatric and perinatal epidemiology* 2008;  
17  
18 22(2): 136-44.  
19  
20  
21 22. Nilsen ST, Bergsjö P, Lökling A, et al. A comparison of cesarean section frequencies  
22 in two Norwegian hospitals. *Acta obstetrica et gynecologica Scandinavica* 1983; **62**: 555-61.  
23  
24  
25 23. Kurd A, Belbisi A, Jaber S et al. Palestinian guidelines and protocols for Obstetricians,  
26 general practitioners and midwives. Preoperative preparation. Ramallah, State of Palestine:  
27  
28  
29  
30  
31  
32  
33 24. Sachs BP, Kobelin C, Castro MA, et al. The risks of lowering the cesarean-delivery  
34 rate. *The New England Journal of Medicine* 1999; **340**: 54-7.  
35  
36  
37 25. Paranjothy S, Frost C, Thomas J. How much variation in CS rates can be explained by  
38 case mix differences? *BJOG: An International Journal of Obstetrics & Gynaecology* 2005;  
39  
40  
41  
42  
43  
44 26. Belizán JM, Showalter E, Castro A, et al. Rates and implications of caesarean sections  
45 in Latin America: ecological study  
46  
47  
48  
49  
50  
51  
52  
53  
54  
55  
56  
57  
58  
59  
60

- 1  
2  
3 27. Fuglenes D, Øian P, Kristiansen IS. Obstetricians' choice of cesarean delivery in  
4 ambiguous cases: is it influenced by risk attitude or fear of complaints and litigation?  
5 *American journal of obstetrics and gynecology* 2009; **200**: 48. e1-. e8.  
6  
7  
8  
9 28. Elvander C, Dahlberg J, Andersson G, et al. Mode of delivery and the probability of  
10 subsequent childbearing: a population-based register study. *BJOG* 2015; **122**:1593-600.  
11  
12  
13 29. Ehrenberg HM, Mercer BM, Catalano PM. The influence of obesity and diabetes on  
14 the prevalence of macrosomia. *American journal of obstetrics and gynecology* 2004; **191**:  
15  
16  
17  
18  
19  
20  
21  
22  
23  
24  
25  
26  
27  
28  
29  
30  
31  
32  
33  
34  
35  
36  
37  
38  
39  
40  
41  
42  
43  
44  
45  
46  
47  
48  
49  
50  
51  
52  
53  
54  
55  
56  
57  
58  
59  
60



Figure 1: Flow chart of the selected study population, multicenter study from Palestine



view only

**STROBE 2007 (v4) Statement—Checklist of items that should be included in reports of *cohort studies***

| Section/Topic            | Item # | Recommendation                                                                                                                                                                       | Reported on page #                                                |
|--------------------------|--------|--------------------------------------------------------------------------------------------------------------------------------------------------------------------------------------|-------------------------------------------------------------------|
| Title and abstract       | 1      | (a) Indicate the study's design with a commonly used term in the title or the abstract                                                                                               | Within the title page 1 and method section of the abstract page 2 |
|                          |        | (b) Provide in the abstract an informative and balanced summary of what was done and what was found                                                                                  | results section of abstract page 2                                |
| <b>Introduction</b>      |        |                                                                                                                                                                                      |                                                                   |
| Background/rationale     | 2      | Explain the scientific background and rationale for the investigation being reported                                                                                                 | page 4                                                            |
| Objectives               | 3      | State specific objectives, including any prespecified hypotheses                                                                                                                     | page 4-5                                                          |
| <b>Methods</b>           |        |                                                                                                                                                                                      |                                                                   |
| Study design             | 4      | Present key elements of study design early in the paper                                                                                                                              | Abstract page 2 and Methods page 5                                |
| Setting                  | 5      | Describe the setting, locations, and relevant dates, including periods of recruitment, exposure, follow-up, and data collection                                                      | pages 5 and 6                                                     |
| Participants             | 6      | (a) Give the eligibility criteria, and the sources and methods of selection of participants. Describe methods of follow-up                                                           | pages 5                                                           |
|                          |        | (b) For matched studies, give matching criteria and number of exposed and unexposed                                                                                                  |                                                                   |
| Variables                | 7      | Clearly define all outcomes, exposures, predictors, potential confounders, and effect modifiers. Give diagnostic criteria, if applicable                                             | pages 6-7                                                         |
| Data sources/measurement | 8*     | For each variable of interest, give sources of data and details of methods of assessment (measurement). Describe comparability of assessment methods if there is more than one group | pages 5                                                           |
| Bias                     | 9      | Describe any efforts to address potential sources of bias                                                                                                                            | N/A                                                               |
| Study size               | 10     | Explain how the study size was arrived at                                                                                                                                            |                                                                   |
| Quantitative variables   | 11     | Explain how quantitative variables were handled in the analyses. If applicable, describe which groupings were chosen and why                                                         | Pages 6                                                           |
| Statistical methods      | 12     | (a) Describe all statistical methods, including those used to control for confounding                                                                                                | Pages 6                                                           |

|                          |     |                                                                                                                                                                                                              |                          |
|--------------------------|-----|--------------------------------------------------------------------------------------------------------------------------------------------------------------------------------------------------------------|--------------------------|
|                          |     | (b) Describe any methods used to examine subgroups and interactions                                                                                                                                          | Pages 7                  |
|                          |     | (c) Explain how missing data were addressed                                                                                                                                                                  | N/A                      |
|                          |     | (d) If applicable, explain how loss to follow-up was addressed                                                                                                                                               | N/A                      |
|                          |     | (e) Describe any sensitivity analyses                                                                                                                                                                        | Pages 7                  |
| <b>Results</b>           |     |                                                                                                                                                                                                              |                          |
| Participants             | 13* | (a) Report numbers of individuals at each stage of study—eg numbers potentially eligible, examined for eligibility, confirmed eligible, included in the study, completing follow-up, and analysed            | pages 8 and figure 1     |
|                          |     | (b) Give reasons for non-participation at each stage                                                                                                                                                         | N/A                      |
|                          |     | (c) Consider use of a flow diagram                                                                                                                                                                           | Figure 1                 |
| Descriptive data         | 14* | (a) Give characteristics of study participants (eg demographic, clinical, social) and information on exposures and potential confounders                                                                     | pages 8-9 and tables 1-2 |
|                          |     | (b) Indicate number of participants with missing data for each variable of interest                                                                                                                          | Tables 1-2               |
|                          |     | (c) Summarise follow-up time (eg, average and total amount)                                                                                                                                                  | N/A                      |
| Outcome data             | 15* | Report numbers of outcome events or summary measures over time                                                                                                                                               | Tables 3                 |
| Main results             | 16  | (a) Give unadjusted estimates and, if applicable, confounder-adjusted estimates and their precision (eg, 95% confidence interval). Make clear which confounders were adjusted for and why they were included | pages 11-14; table 4-5   |
|                          |     | (b) Report category boundaries when continuous variables were categorized                                                                                                                                    | N/A                      |
|                          |     | (c) If relevant, consider translating estimates of relative risk into absolute risk for a meaningful time period                                                                                             | N/A                      |
| Other analyses           | 17  | Report other analyses done—eg analyses of subgroups and interactions, and sensitivity analyses                                                                                                               | Page 14                  |
| <b>Discussion</b>        |     |                                                                                                                                                                                                              |                          |
| Key results              | 18  | Summarise key results with reference to study objectives                                                                                                                                                     | Page 14                  |
| <b>Limitations</b>       |     |                                                                                                                                                                                                              |                          |
| Interpretation           | 20  | Give a cautious overall interpretation of results considering objectives, limitations, multiplicity of analyses, results from similar studies, and other relevant evidence                                   | Pages 14-17              |
| Generalisability         | 21  | Discuss the generalisability (external validity) of the study results                                                                                                                                        | pages 5 and 14           |
| <b>Other information</b> |     |                                                                                                                                                                                                              |                          |
| Funding                  | 22  | Give the source of funding and the role of the funders for the present study and, if applicable, for the original study on which the present article is based                                                | Page 19                  |

\*Give information separately for cases and controls in case-control studies and, if applicable, for exposed and unexposed groups in cohort and cross-sectional studies.

1  
2  
3  
4  
5  
6  
7  
8  
9  
10  
11  
12  
13  
14  
15  
16  
17  
18  
19  
20  
21  
22  
23  
24  
25  
26  
27  
28  
29  
30  
31  
32  
33  
34  
35  
36  
37  
38  
39  
40  
41  
42  
43  
44  
45  
46  
47

**Note:** An Explanation and Elaboration article discusses each checklist item and gives methodological background and published examples of transparent reporting. The STROBE checklist is best used in conjunction with this article (freely available on the Web sites of PLoS Medicine at <http://www.plosmedicine.org/>, Annals of Internal Medicine at <http://www.annals.org/>, and Epidemiology at <http://www.epidem.com/>). Information on the STROBE Initiative is available at [www.strobe-statement.org](http://www.strobe-statement.org).

For peer review only
