# Supplementary figures and images for: Differences in rates and odds for emergency caesarean section in six Palestinian hospitals: a population-based birth cohort study
Source: PubMed Central journal article supplement — BMJ Open. 2018 Mar 2;8(3):e019509. doi: 10.1136/bmjopen-2017-019509 (PMC5855207; doi:10.1136/bmjopen-2017-019509), 2018-03-02

Figure 1: Flow chart of the selected study population, multicenter study from Palestine

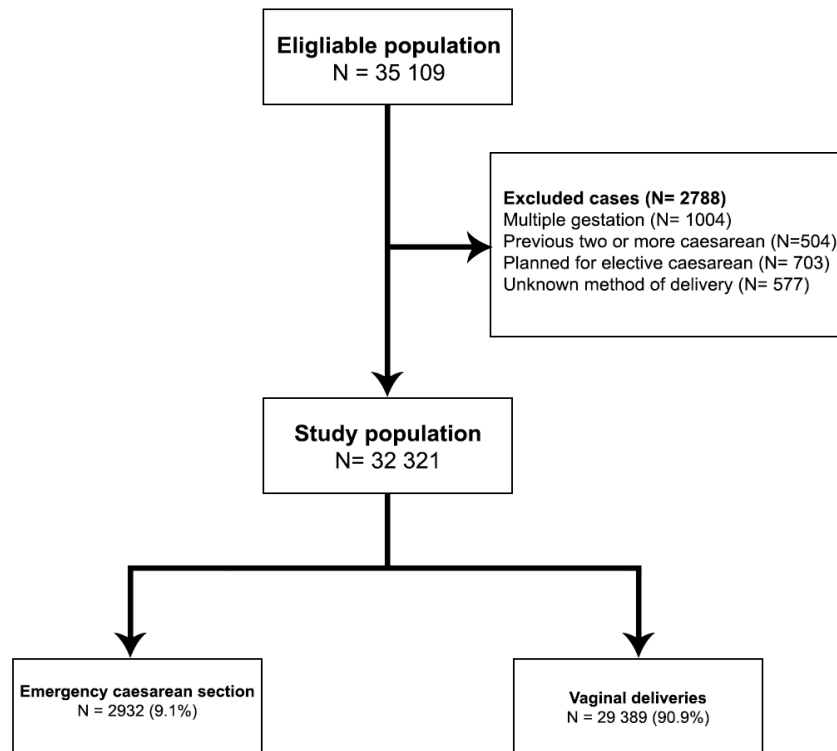

Supplement: bmjopen-2017-019509supp001.pdf [file bmjopen-2017-019509supp001.pdf]
